# Supplementary material for: Uncovering diverse reactivity of NHCs with diazoalkane: C–H activation, CC bond formation, and access to N-heterocyclic methylenehydrazine
Source: Royal Society of Chemistry journal article supplement (doi:10.1039/d4sc05740f), 2024-01-01
Supplement: d4sc05740f1.pdf [file d4sc05740f1.pdf]

## Supporting Information

*for*

### **Uncovering diverse reactivity of NHCs with diazoalkane: C-H activation, C=C bond formation, and access to N-heterocyclic methylenehydrazine**

Kajal Balayan, Himanshu Sharma, Kumar Vanka, Rajesh G. Gonnade\* and Sakya S. Sen\*

#### **Contents**

1. General procedures and instrumentation
2. Experimental section with spectroscopic details
3. Miscellaneous information
4. Crystallographic data for the structural analysis
5. DFT calculations
6. References
7. Optimized Cartesian Coordinates

## 1. General procedures and instrumentation

All manipulations and experiments were performed in an inert atmosphere of argon using standard Schlenk techniques (unless otherwise mentioned) and in an argon-filled MBRAUN glove box. The solvents, toluene, THF, and hexane were purified by MBRAUN solvent purification system MB SPS-800 and stored over activated 4 Å molecular sieves before use. All chemicals were purchased from Sigma Aldrich and TCI chemicals (0.6 M Me<sub>3</sub>SiCHN<sub>2</sub> solution in hexane) and used without further purification. The starting materials 6-SIPr, 5-IPr, 5-SIPr, 5-*t*Bu, and DAC carbenes were synthesized using a literature procedure.<sup>1</sup> Deuterated NMR solvents, benzene-*d*<sub>6</sub>, CDCl<sub>3</sub> and THF-*d*<sub>8</sub> were stored over 4 Å molecular sieves at least 48 h before use. The <sup>1</sup>H, <sup>13</sup>C, and <sup>29</sup>Si NMR spectra were recorded in a Bruker Avance DPX 400 and Bruker Avance DPX 500 spectrometer. High-resolution mass spectra (HRMS) were obtained using a Q Exactive Thermo Scientific. The IR Spectra were acquired by using Bruker Alpha-II ECO-ATR spectrophotometer using solid samples in the 500-4000 cm<sup>-1</sup> range. Melting points were measured in a sealed glass tube on a Stuart SMP-30 melting point apparatus.

## 2. Experimental section with spectroscopic details

**Synthesis of 1:** 5-SIPr (0.200 g, 0.51 mmol) was dissolved in 10 mL toluene in a Schlenk flask and kept at -36 °C for 10 min. After that, Me<sub>3</sub>SiCHN<sub>2</sub> (0.938 mL, 0.56 mmol) was added to the solution resulting in a yellow-colored solution. The reaction was run for 18 hours while slowly warming to room temperature. All the volatiles were removed and the residue was dissolved in 6-8 mL of hexane. The solution was filtered using a cannula, concentrated to 2 mL, and stored at room temperature to get block-shaped yellow crystals of **1** and **2** after one day with a total yield of 56% of **1** and 9% of **2** calculated from NMR. **2** resulted from the hydrolysis of 5-SIPr due to the adventitious amount of water.

**1** and **2** could not be separated as both crystallized simultaneously.

**<sup>1</sup>H NMR (400 MHz, 298 K, C<sub>6</sub>D<sub>6</sub>):** δ = -0.38 (singlet, 9 H, Si(CH<sub>3</sub>)<sub>3</sub>), δ = 1.21 (d, *J* = 6.75 Hz, 6 H, CH(CH<sub>3</sub>)<sub>2</sub>), δ = 1.27 (d, *J* = 6.88 Hz, 6 H, CH(CH<sub>3</sub>)<sub>2</sub>), δ = 1.34 (d, *J* = 6.88 Hz, 6 H, CH(CH<sub>3</sub>)<sub>2</sub>), δ = 1.49 (d, *J* = 6.88 Hz, 6 H, CH(CH<sub>3</sub>)<sub>2</sub>), 3.47 (multiplet, merging sept with NCH<sub>2</sub>CH<sub>2</sub>N, *J* = 6.88 Hz, 2 H, CH(CH<sub>3</sub>)<sub>2</sub>), 3.48

(multiplet, merging quart with  $\text{CH}(\text{CH}_3)_2$ ),  $J = 2.63$  Hz, 2 H,  $\text{NCH}_2\text{CH}_2\text{N}$ ), 3.77 (quart,  $J = 2.63$  Hz, 2 H,  $\text{NCH}_2\text{CH}_2\text{N}$ ), 4.19 (sept,  $J = 6.88$  Hz, 2 H,  $\text{CH}(\text{CH}_3)_2$ ), 5.14 (singlet, C-H), 7.09 (multiplet, 4 H, Ar-H), 7.19 (t, 2 H, Ar-H) ppm.

**$^{13}\text{C}\{^1\text{H}\}$  NMR (101 MHz, 298 K,  $\text{C}_6\text{D}_6$ ):**  $\delta = -1.62$  ( $\text{Si}(\text{CH}_3)_3$ ),  $\delta = 23.89$ , 24.26, 26.11, 26.26 ( $\text{CH}(\text{CH}_3)_2$ ), 27.65 ( $\text{CH}(\text{CH}_3)_2$ ), 28.80 ( $\text{NCH}_2\text{CH}_2\text{N}$ ), 53.06 ( $\text{SiMe}_3\text{CNN}$ ), 83.92 (NCN), 124.44, (Ar-C), 124.77 (Ar-C), 127.76 (Ar-C), 139.75 (Ar-C), 149.20 (Ar-C), 151.75 (Ar-C).

**$^{29}\text{Si}$  (79.49 MHz, 298 K,  $\text{C}_6\text{D}_6$ ):** -2.10 ppm

**HRMS:**  $m/z$  calcd for  $[\text{M}+\text{H}]^+$   $\text{C}_{31}\text{H}_{49}\text{N}_4\text{Si}$ , 505.84; found **505.37**.

**IR ( $\text{cm}^{-1}$ ):** 2960.88, 2037.15, 1653.64, 1453.63, 1255.69, 1096.93, 1045.38, 802.07.

**Melting point range:** 77-85 °C.

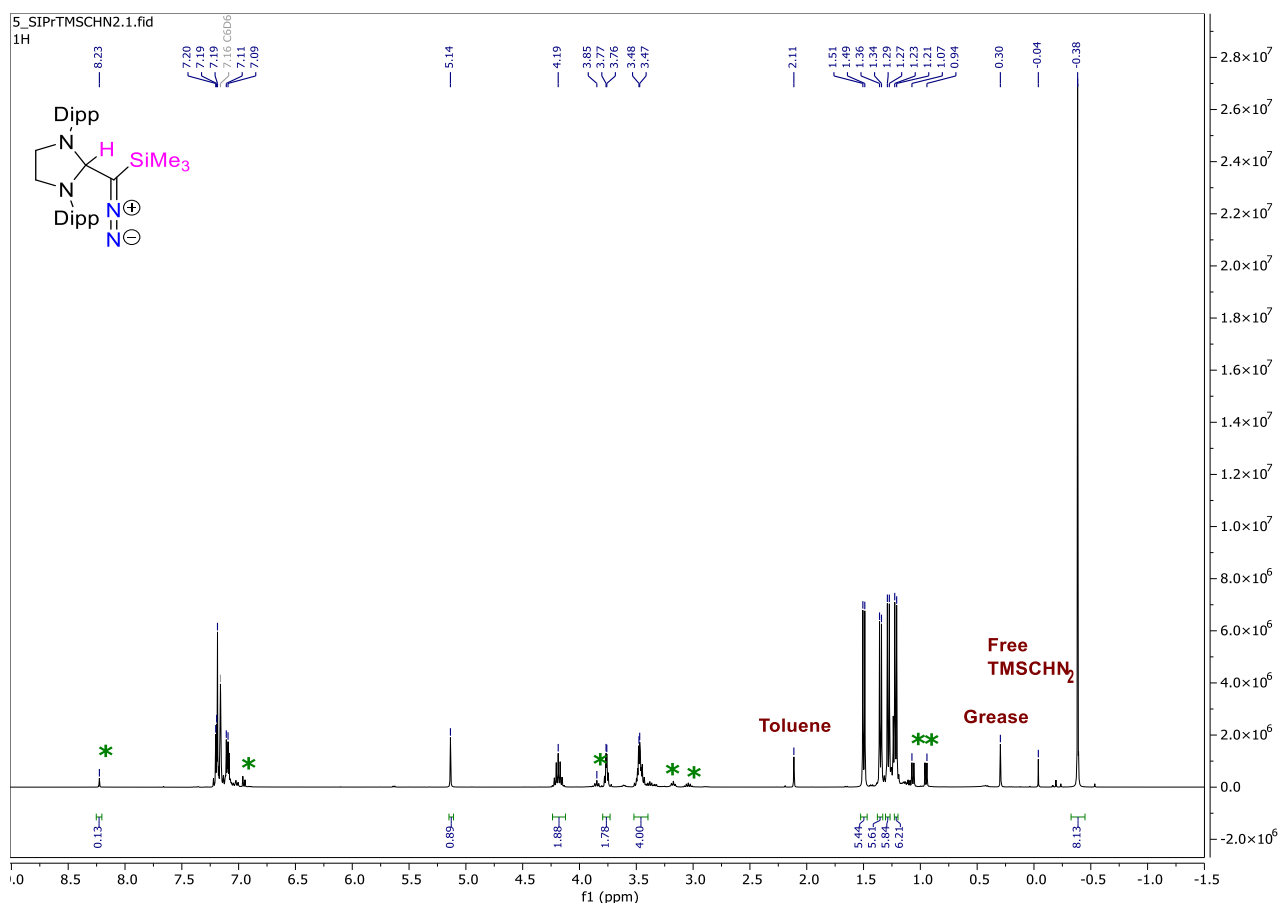

**Figure S1:**  $^1\text{H}$  NMR spectrum of **1** (Peak at -0.04 belongs to free  $\text{Me}_3\text{SiCHN}_2$ , Peaks with green asterisks belong to **2**)

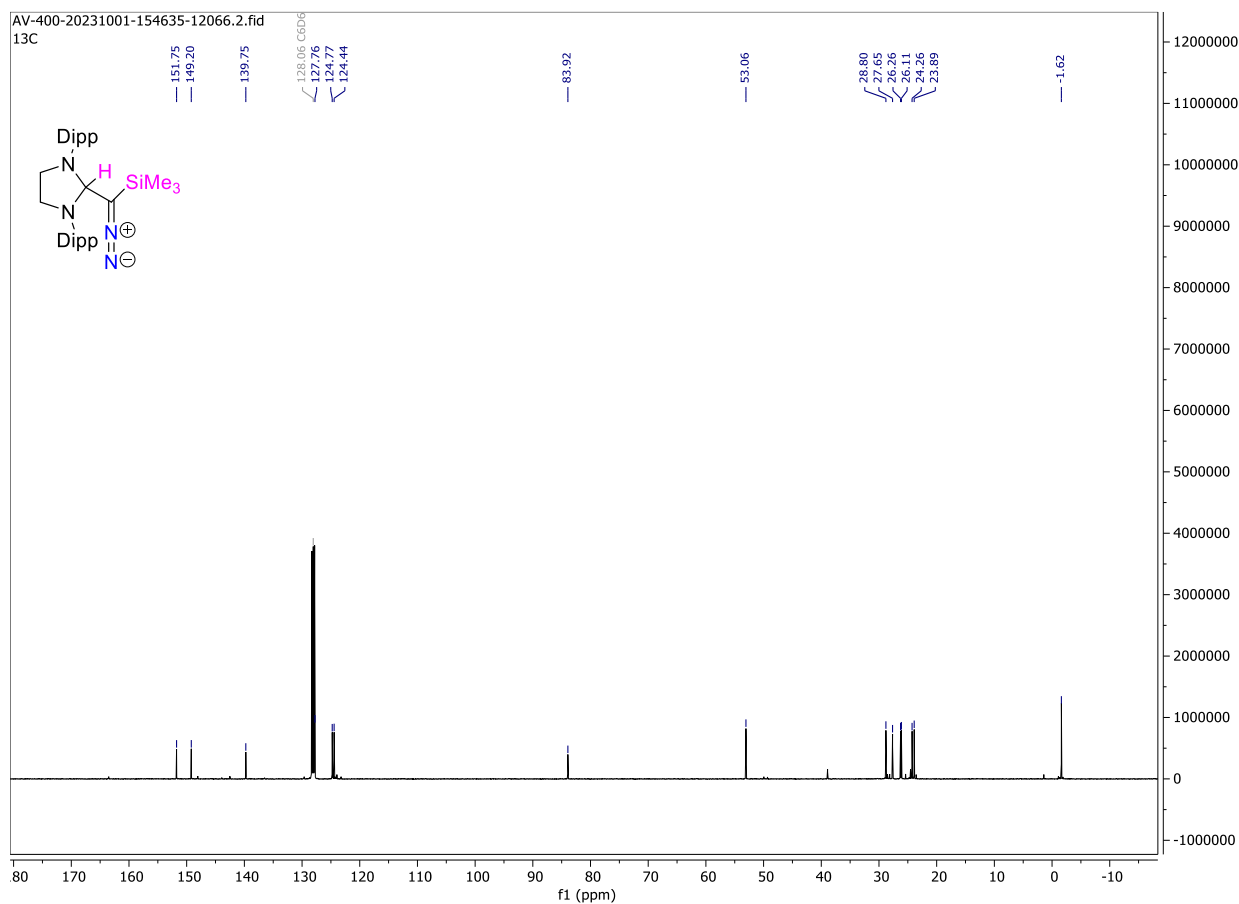

Figure S2:  $^{13}\text{C}\{^1\text{H}\}$  NMR spectrum of 1

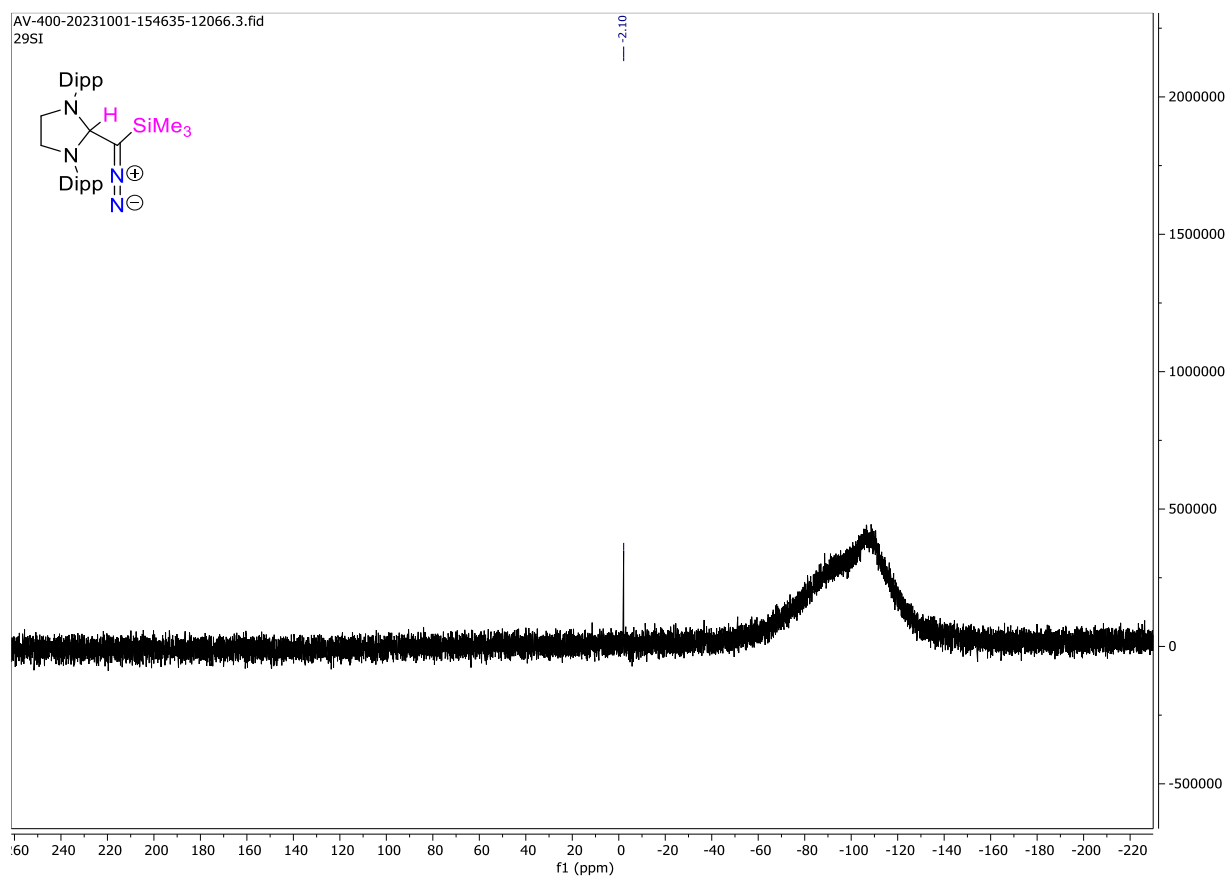

Figure S3:  $^{29}\text{Si}\{^1\text{H}\}$  NMR spectrum of 1

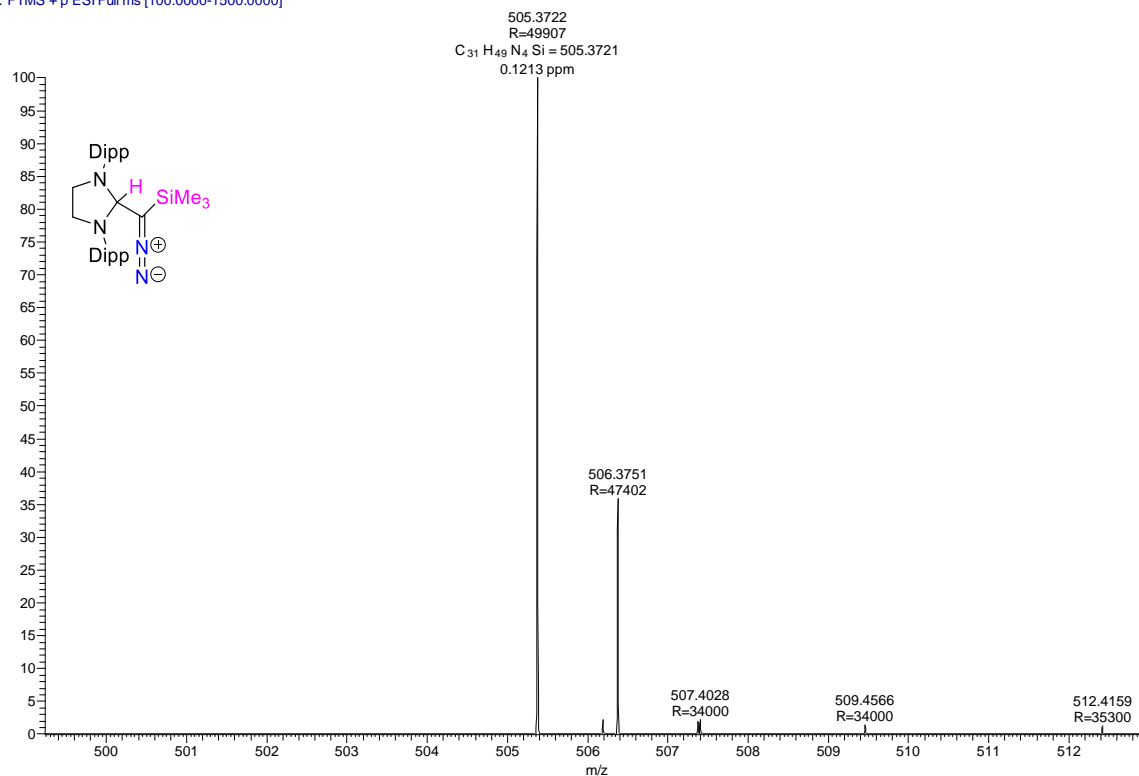

Figure S4: HRMS spectrum of 1

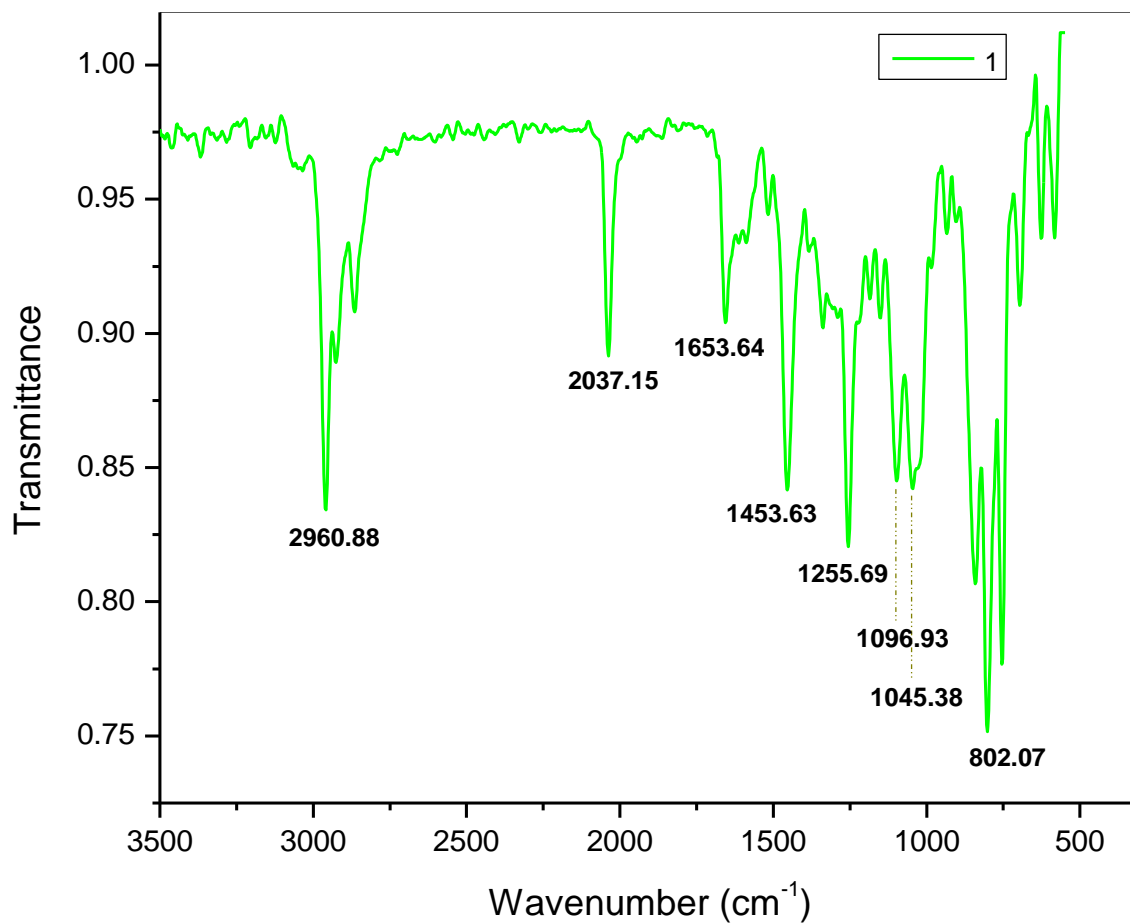

Figure S5: IR (ATR) spectrum of 1

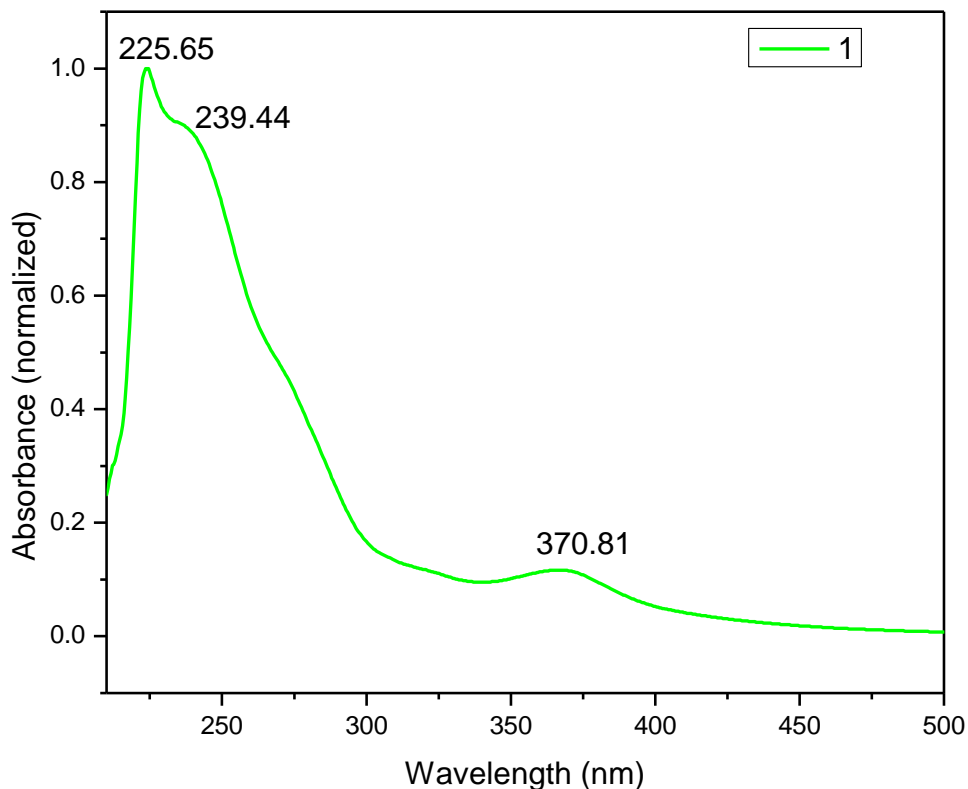

**Figure S6:** UV-VIS spectrum of **1** in THF

**Synthesis of 3:** 6-SIPr (0.200 g, 0.49 mmol) was dissolved in 10 mL toluene in a Schlenk flask and kept at  $-36\text{ }^{\circ}\text{C}$  for 10 min. After that,  $\text{Me}_3\text{SiCHN}_2$  (0.90 mL, 0.54 mmol) was added to it resulting in a yellow-colored solution. The reaction was run for 20 hours while slowly warming to room temperature. All the volatiles were removed and the residue was dissolved in 6-8 mL of hexane. The solution was filtered using a cannula, concentrated to 3 mL, and stored at room temperature to get plate-shaped yellow crystals of **3** after a day with a yield of 68%.

**$^1\text{H}$  NMR (400 MHz, 298 K,  $\text{C}_6\text{D}_6$ ):**  $\delta$  = -0.21 (singlet, 9 H,  $\text{Si}(\text{CH}_3)_3$ ), 1.31 (broad d,  $J$  = 4.77 Hz, 12 H,  $\text{CH}(\text{CH}_3)_2$ ), 1.42 (broad d,  $J$  = 13.20 Hz, 12 H,  $\text{CH}(\text{CH}_3)_2$ ), 1.62 (quint,  $J$  = 5.99 Hz, 2 H,  $\text{NCH}_2\text{CH}_2\text{CH}_2\text{N}$ ), 3.14 (t,  $J$  = 5.99 Hz, 4 H,  $\text{NCH}_2\text{CH}_2\text{CH}_2\text{N}$ ), 3.33 (sept,  $J$  = 6.72, 4 H,  $\text{CH}(\text{CH}_3)_2$ ), 7.08 (broad, 4 H, Ar-H), 7.40 (singlet, 1 H,  $\text{NNCHSiMe}_3$ ) ppm.

**$^{13}\text{C}\{^1\text{H}\}$  NMR (125.7 MHz, 298 K,  $\text{CDCl}_3$ ):**  $\delta$  = -1.70 ( $\text{Si}(\text{CH}_3)_3$ ), 23.46 ( $\text{NCH}_2\text{CH}_2\text{CH}_2\text{N}$ ), 24.18( $\text{CH}(\text{CH}_3)_3$ ), 24.93 ( $\text{CH}(\text{CH}_3)_3$ ), 28.92 ( $\text{CH}(\text{CH}_3)_3$ ), 49.28 ( $\text{NCH}_2\text{CH}_2\text{CH}_2\text{N}$ ), 52.91( $\text{NCH}_2\text{CH}_2\text{CH}_2\text{N}$ ), 123.74 (Ar-C), 126.70 (Ar-C), 127.40 (Ar-C), 141.02 (Ar-C), 144.24 (Ar-C), 146.23 (Ar-C), 151.37 ( $\text{CNNCHSiMe}_3$ ), 156.01 ( $\text{NNCHSiMe}_3$ ) ppm.

**$^{29}\text{Si}$  (79.49 MHz, 298 K,  $\text{CDCl}_3$ ):** -11.16 ppm.

**HRMS:**  $m/z$  calcd for  $[\text{M}+\text{H}]^+$   $\text{C}_{34}\text{H}_{51}\text{N}_4\text{Si}$ , 519.87; found **519.38**.

**IR (cm<sup>-1</sup>):** 2956.76, 1550.54, 1494.87, 1455.70, 1290.74, 1249.51, 1210.33, 1045.38, 833.00.

**Melting point range:** 125-130 °C.

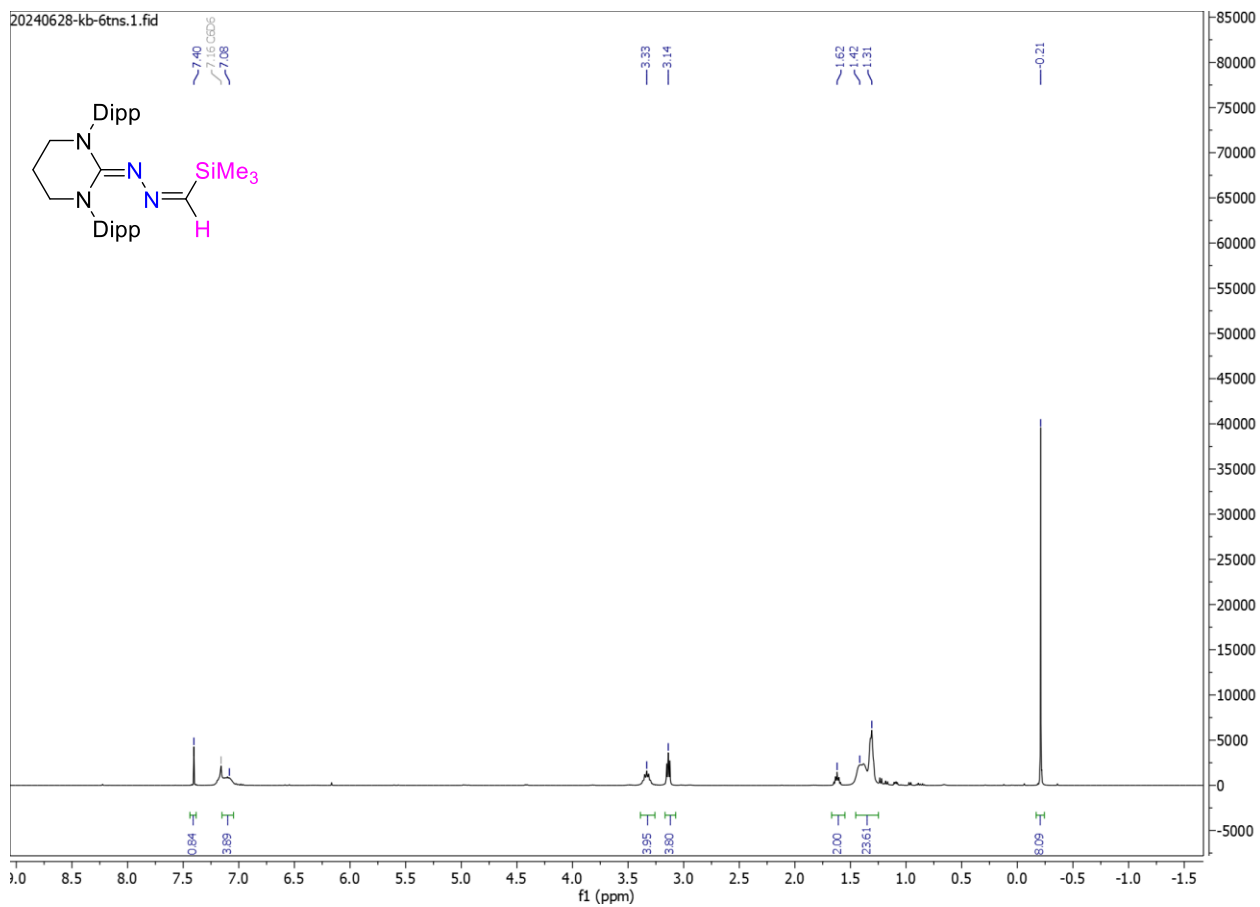

**Figure S7:** <sup>1</sup>H NMR spectrum of **3** (Smaller peaks in the region 1.4-0.75 ppm belong to minor impurities)

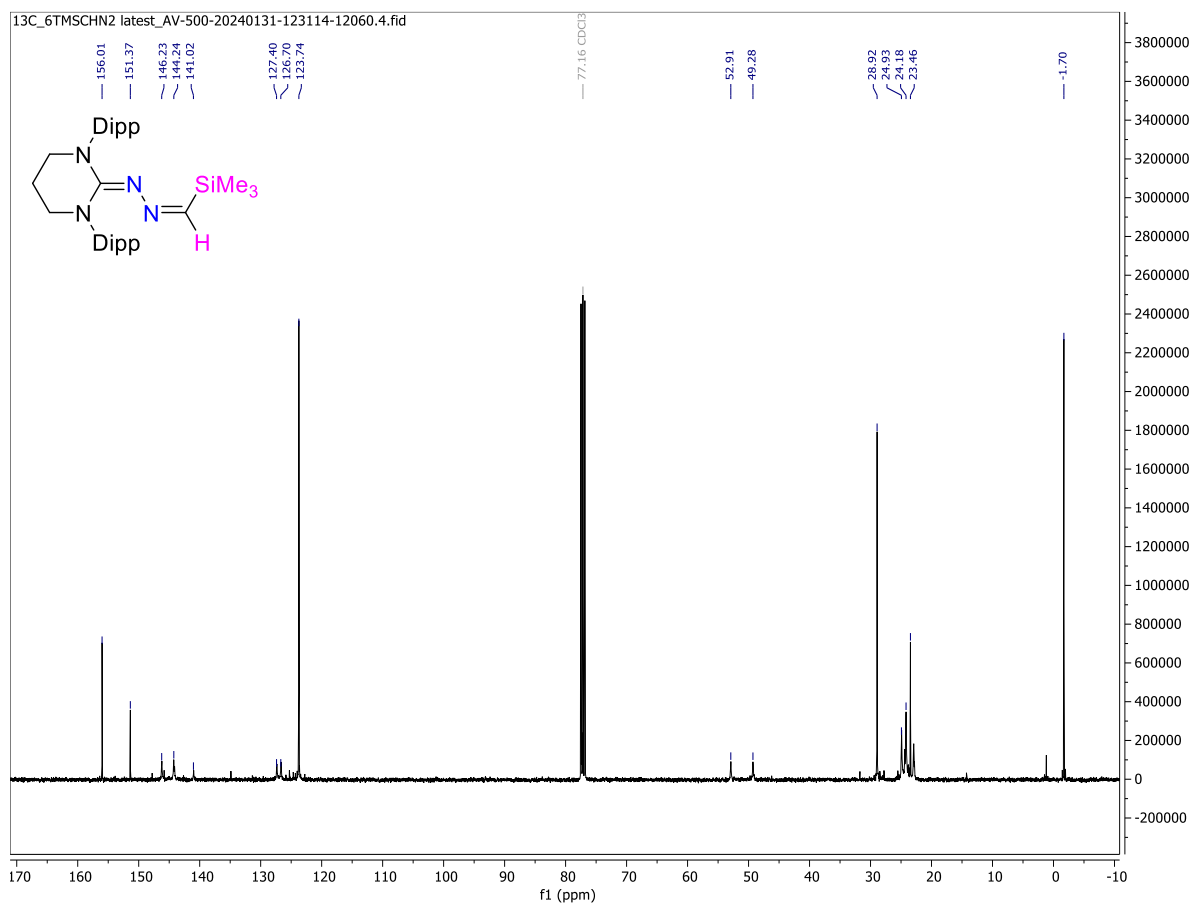

Figure S8:  $^{13}\text{C}\{^1\text{H}\}$  NMR spectrum of **3**

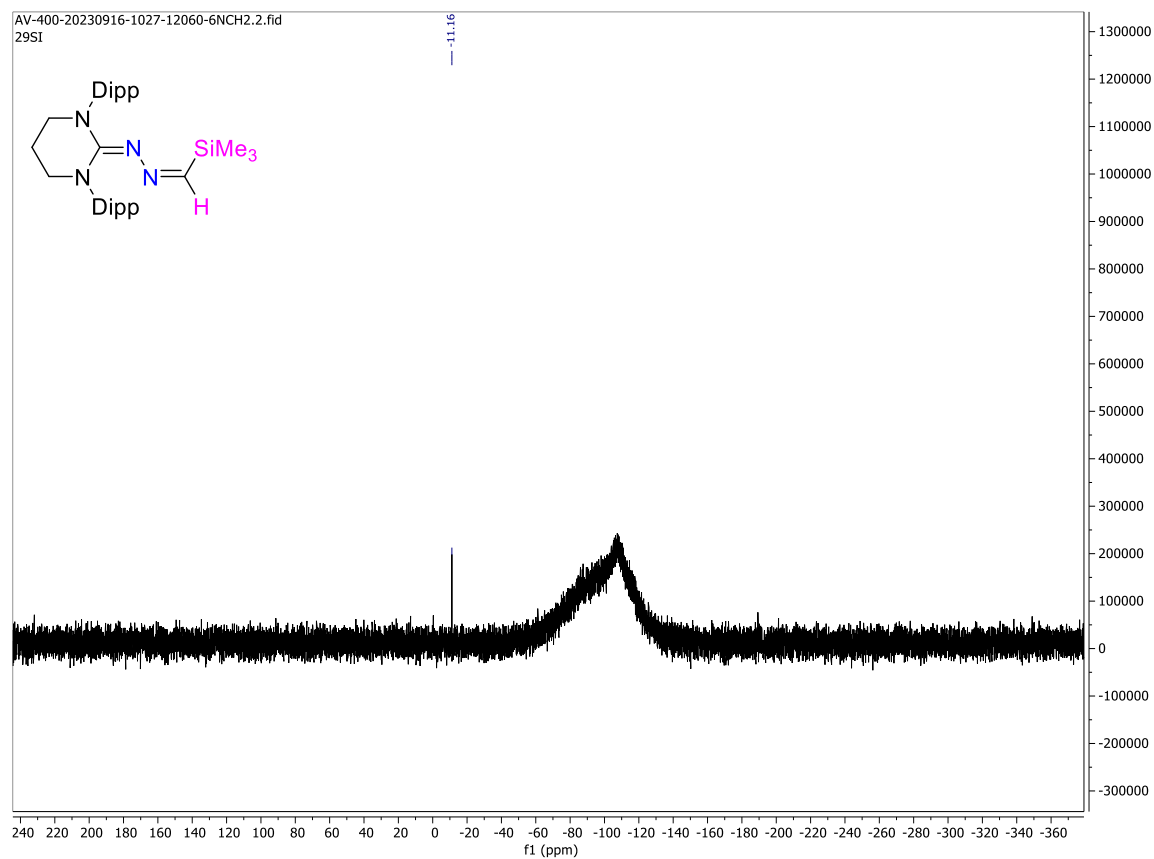

Figure S9:  $^{29}\text{Si}$  NMR spectrum of **3**



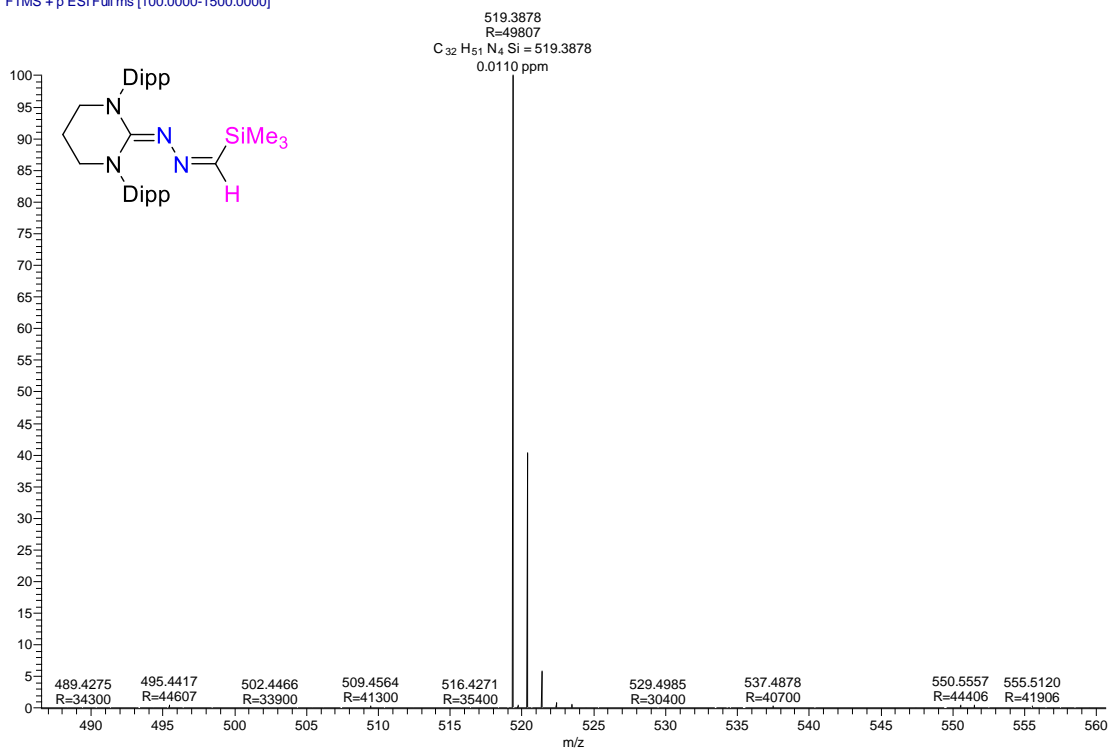

Figure S10: HRMS spectrum of 3

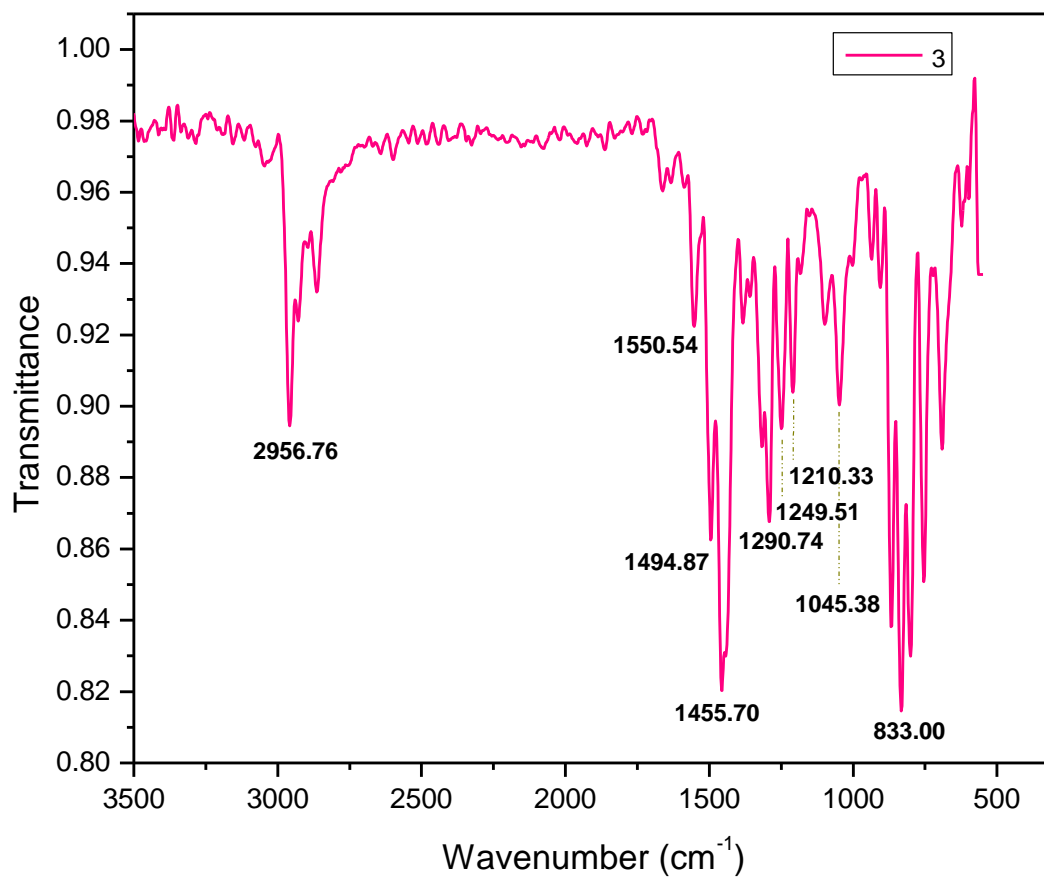

Figure S11: IR (ATR) spectrum of 3

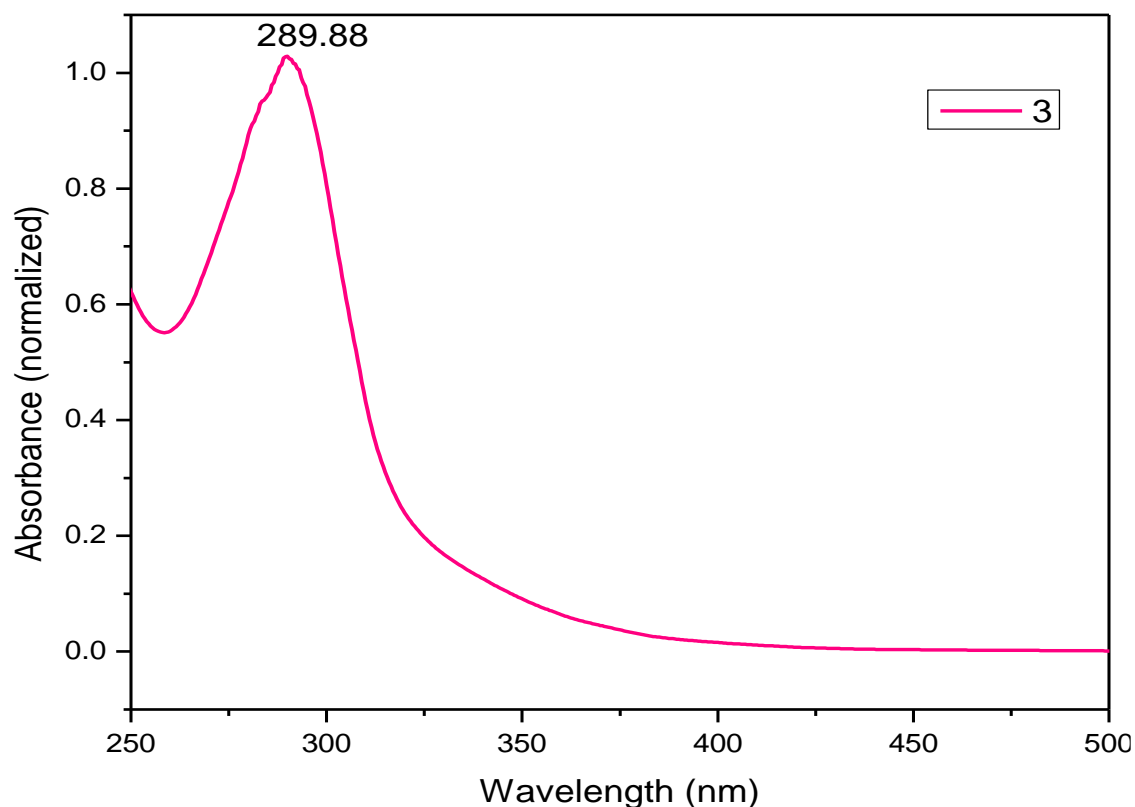

**Figure S12:** UV-VIS spectra of **3** in THF

**Synthesis of 4:** 5-IPr (0.200 g, 0.51 mmol) was dissolved in 10 mL toluene in a Schlenk flask and kept at  $-36\text{ }^{\circ}\text{C}$  for 10 min. After that,  $\text{SiMe}_3\text{CHN}_2$  (0.943 mL, 0.56 mmol) was added to it at low temperature. The reaction was run for 24 hours while slowly warming to room temperature, resulting in a deep red solution. The solution was filtered using a cannula. All the volatiles were removed, resulting in a red-colored sticky compound, which gets solidified after keeping the flask in a glove box to afford pure red-colored solid, **4** within 24 h with a yield of 85%.

After several attempts, crystals of **4** were obtained by slow evaporation of  $\text{CDCl}_3$  in a *vial* at room temperature.

**$^1\text{H}$  NMR (400 MHz, 298 K,  $\text{C}_6\text{D}_6$ ):**  $\delta = -0.18$  (singlet, 9 H,  $\text{Si}(\text{CH}_3)_3$ ), 1.23 (d,  $J = 6.88$  Hz, 12 H,  $\text{CH}(\text{CH}_3)_2$ ), 1.38 (d,  $J = 6.88$  Hz, 12 H,  $\text{CH}(\text{CH}_3)_2$ ), 3.18 (broad sept, 4 H,  $\text{CH}(\text{CH}_3)_2$ ), 5.83 (broad singlet, 2 H,  $\text{NCHCHN}$ ), 7.12 (d,  $J = 7.75$  Hz, 4 H, Ar-H), 7.23 (t, 2 H,  $J = 7.50$  Hz, Ar-H), 7.68 (singlet, 1 H,  $\text{NNCHSiMe}_3$ ) ppm.

**$^{13}\text{C}\{^1\text{H}\}$  NMR (125.7 MHz, 298 K,  $\text{CDCl}_3$ ):**  $\delta = -1.95$  ( $\text{Si}(\text{CH}_3)_3$ ), 22.69, 23.97 ( $\text{CH}(\text{CH}_3)_2$ ), 28.95 ( $\text{CH}(\text{CH}_3)_2$ ), 114.74 ( $\text{NCHCHN}$ ), 117.10 ( $\text{NCHCHN}$ ), 123.35 (Ar-C), 124.04 (Ar-C), 128.36 (Ar-C), 129.17 (Ar-C), 145.50 (Ar-C), 147.27 (Ar-C), 150.60 ( $\text{CNNCHSiMe}_3$ ), 155.22 ( $\text{NNCHSiMe}_3$ ).

**$^{29}\text{Si}$  (79.49 MHz, 298 K,  $\text{C}_6\text{D}_6$ ):**  $-10.88$  ppm.

**IR (cm<sup>-1</sup>):** 2958.82, 1591.78, 1503.12, 1463.94, 1356.73, 1249.51, 1055.69, 938.16, 837.13.

**HRMS:** m/z calcd for [M+H]<sup>+</sup> C<sub>31</sub>H<sub>47</sub>N<sub>4</sub>Si, 503.35; found **503.35**.

**Melting point range:** 90-95 °C.

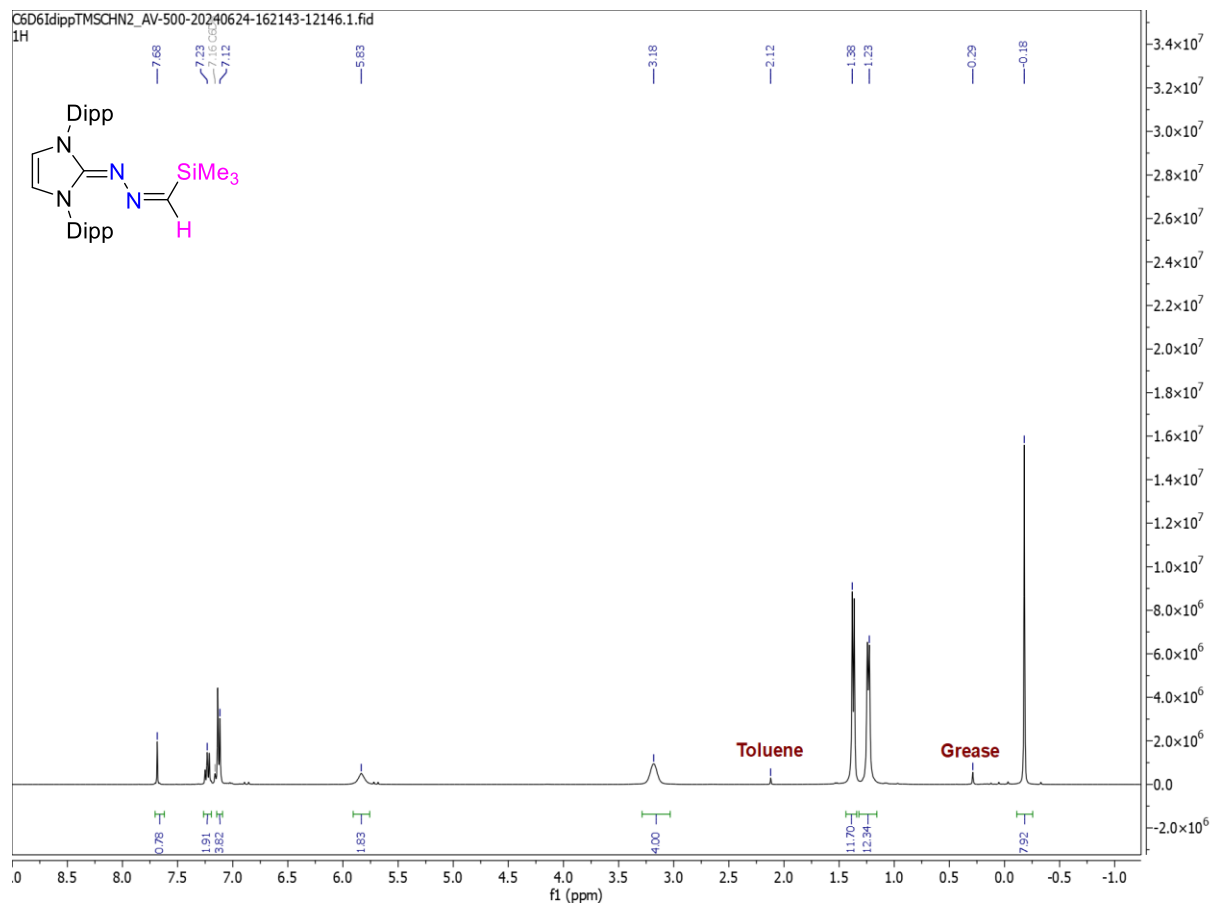

**Figure S13:** <sup>1</sup>H NMR spectrum of **4**

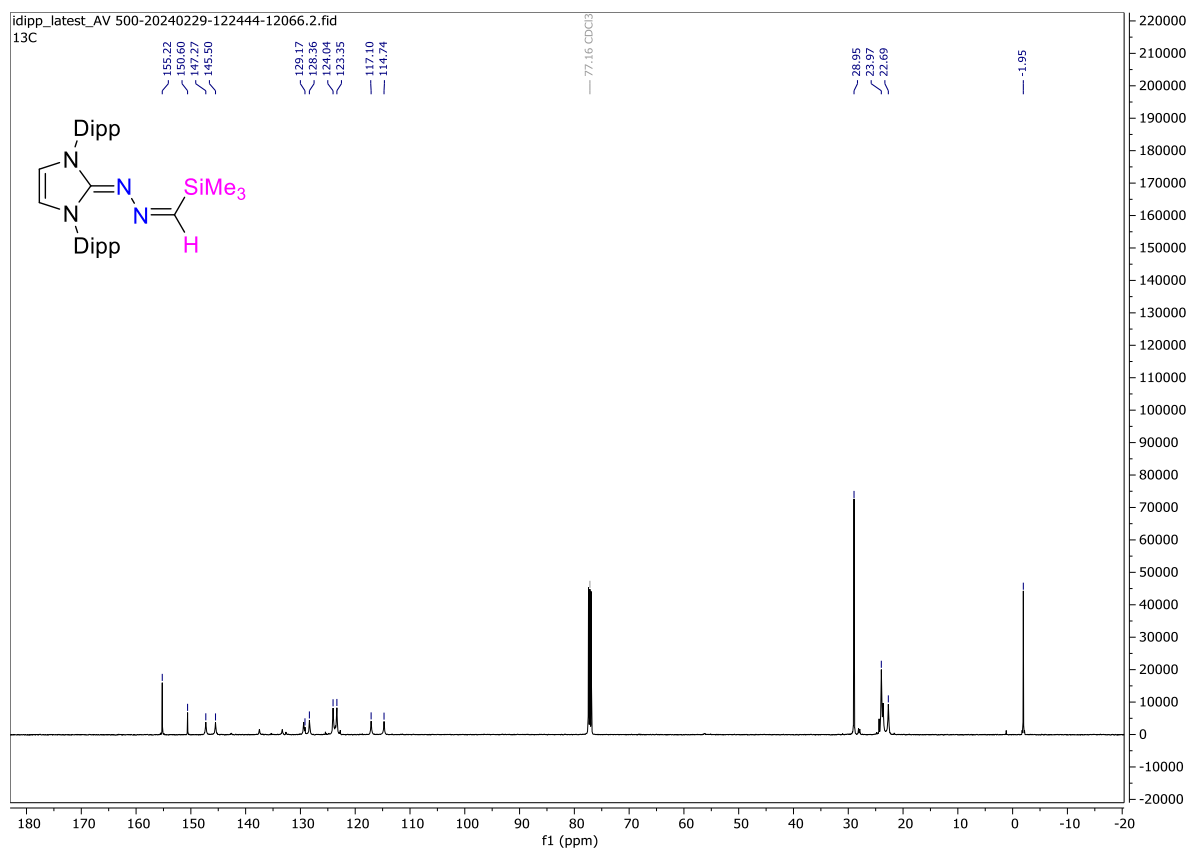

Figure S14:  $^{13}\text{C}\{^1\text{H}\}$  NMR spectrum of 4

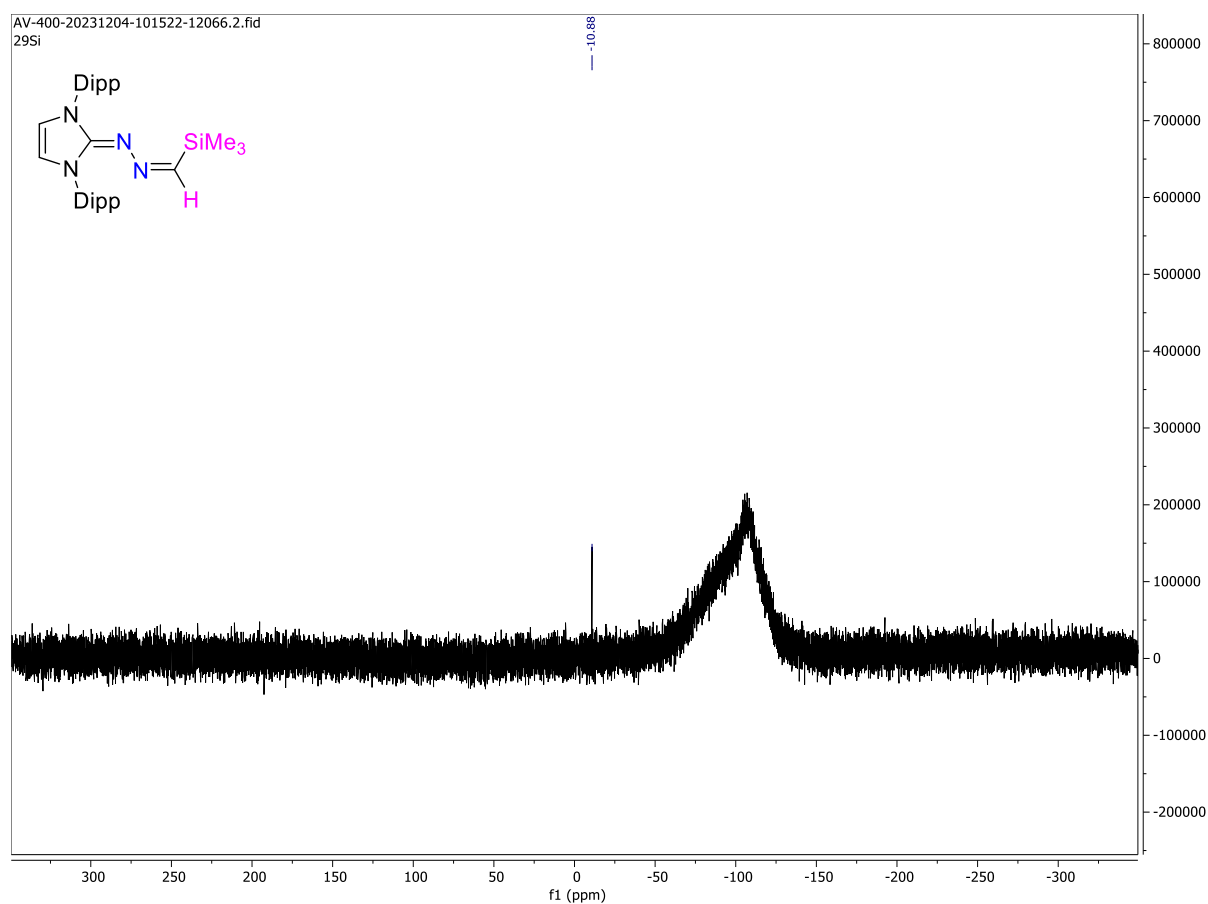

Figure S15:  $^{29}\text{Si}\{^1\text{H}\}$  NMR spectrum of 4

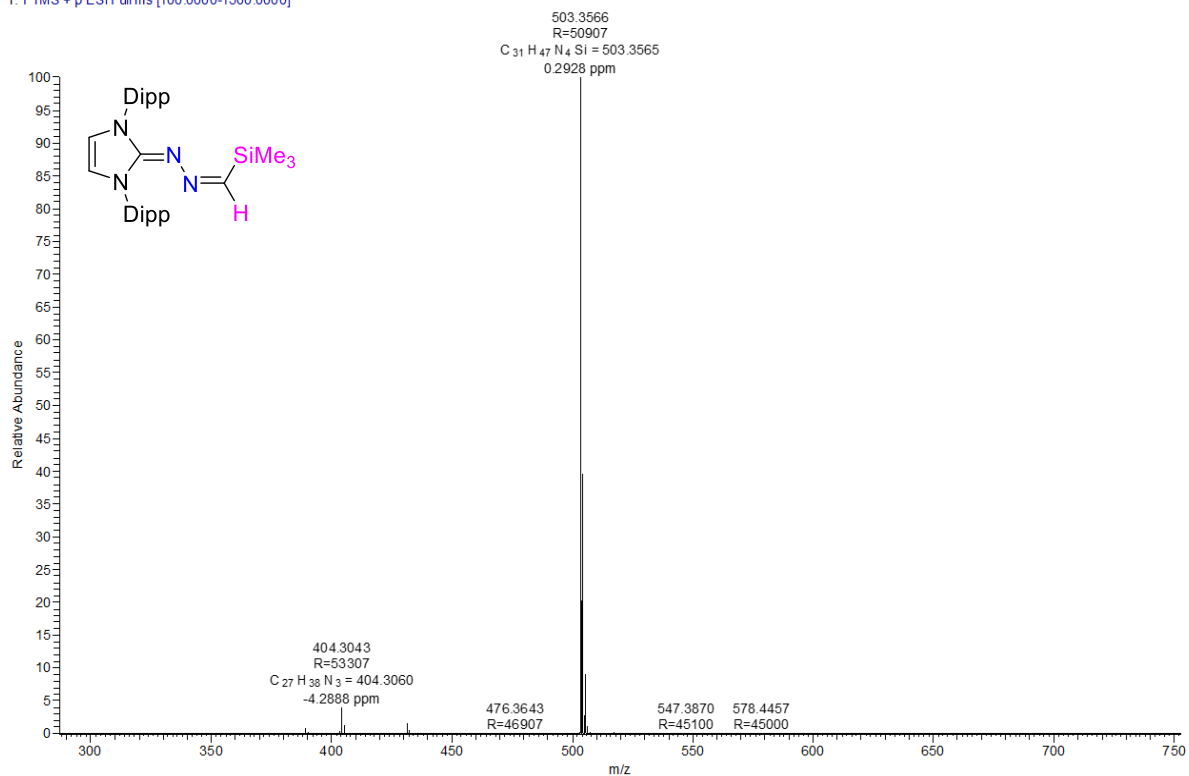

Figure S16: HRMS spectrum of 4

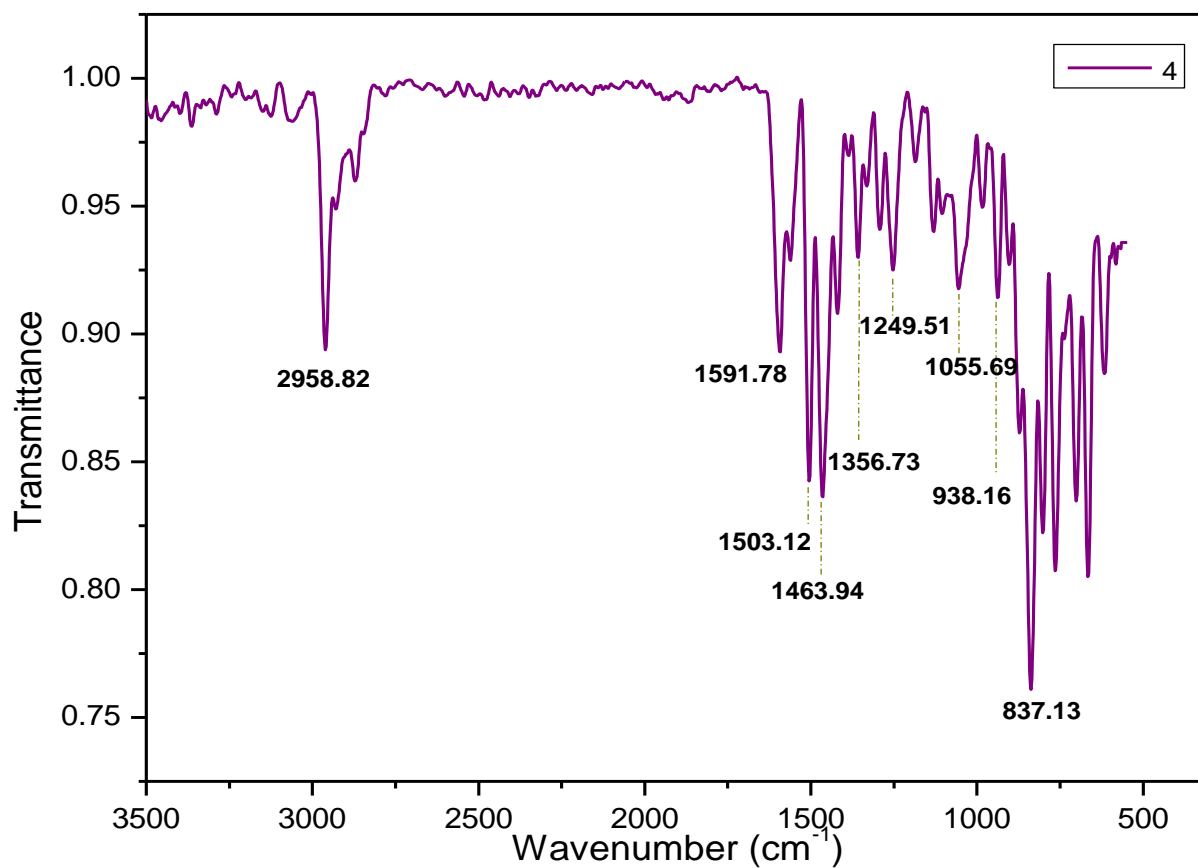

Figure S17: IR (ATR) spectrum of 4

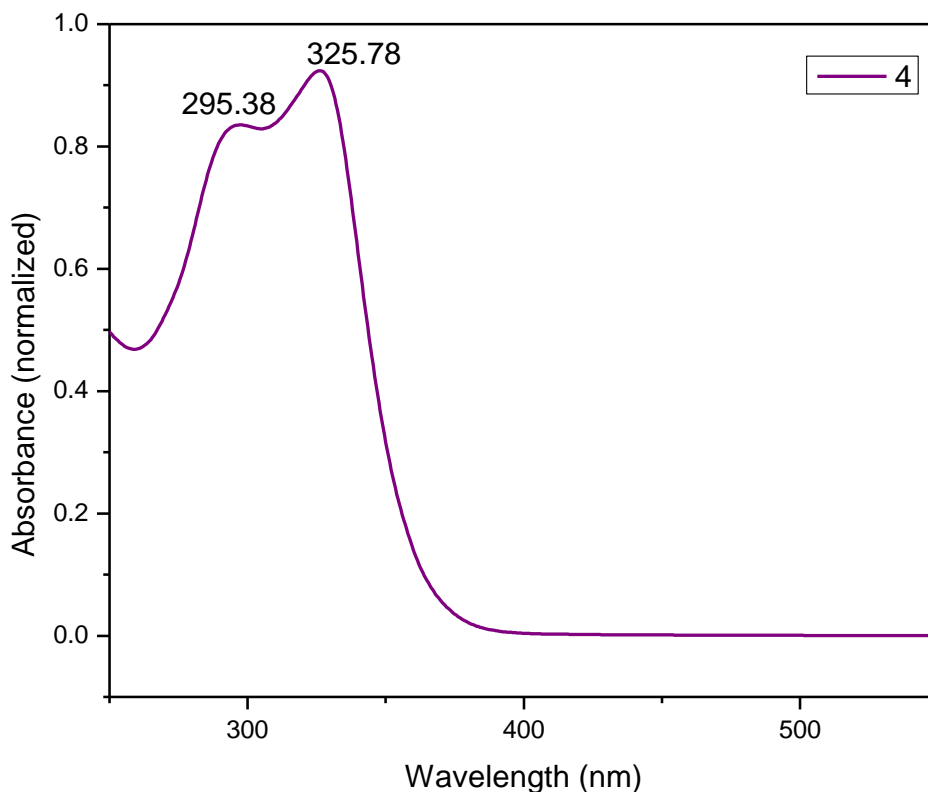

**Figure S18:** UV-VIS spectrum of **4** in THF

### Synthesis of **5**:

#### Method 1: By deprotonation of **5a** using bases such as $\text{Et}_3\text{N}$ or KHMDS

**5a** (0.350 g, 0.75 mmol) was dissolved in 10 mL THF in a round bottom flask. After that,  $\text{Et}_3\text{N}$  (0.12 mL, 0.82 mmol) was added to it at room temperature, resulting in the immediate formation of  $\text{Et}_3\text{NH}^+\text{Cl}^-$  precipitate. The reaction was run for 12 hours. All the volatiles were completely removed to give a white-colored solid. After that, 10 mL toluene was added to it and stirred for 15 min. Filtered the solution using the funnel. All the volatiles were completely removed to afford the pure yellow-colored solid, with a yield of 53%.

Or

**4** (0.070 g, 0.15 mmol) was taken in a Schlenk flask and dried for 20 min. After that, **4** and KHMDS (0.032g, 0.16 mmol) were taken together in the Schlenk flask under the Argon atmosphere, and 10 mL THF was added to it at room temperature, resulting in an orange-colored solution. The reaction was run for 12 hours. All the volatiles were completely removed, and 10 mL toluene was added to it and stirred for 15 minutes. Filtered the solution using a funnel. Completely removed all the volatiles to afford the pure yellow-colored solid, **5**.

**Method 2: By the one-pot reaction of 5-IPr, SiMe<sub>3</sub>CHN<sub>2</sub>, and water**

5-IPr carbene (0.200 g, 0.51 mmol) was dissolved in 8 mL toluene in a Schlenk flask. After that, SiMe<sub>3</sub>CHN<sub>2</sub> (0.86 mL, 0.51 mmol) and degassed water (0.01 mL, 0.51 mmol) were added to it at room temperature. The reaction was stirred for 12 hours, resulting in a yellow-colored solution. The solution was filtered using a cannula. Completely removed all the volatiles to afford the pure yellow-colored solid, **5**. Suitable crystals of **5** were obtained upon supersaturation in toluene.

**Note:** The reaction requires the precise addition of water, as excess water can lead to the formation of a mixture of decomposed products of carbene along with **5**.

**<sup>1</sup>H NMR (400 MHz, 298 K, C<sub>6</sub>D<sub>6</sub>):** δ = 1.25 (d, *J* = 7 Hz, 12 H, CH(CH<sub>3</sub>)<sub>2</sub>), 1.39 (d, *J* = 6.75 Hz, 12 H, CH(CH<sub>3</sub>)<sub>2</sub>), 3.19 (sept, *J* = 5.75 Hz, 4 H, CH(CH<sub>3</sub>)<sub>2</sub>), 5.70 (d, 1 H, *J* = 15.01 Hz, NNCH<sub>2</sub>), 5.83 (singlet, 2 H, NCHCHN), 6.89 (d, 1 H, *J* = 15.01 Hz, NNCH<sub>2</sub>), 7.11 (d, *J* = 7.50 Hz, 4 H, Ar-H), 7.21 (t, *J* = 7.75 Hz, 2 H, Ar-H).

**<sup>13</sup>C{<sup>1</sup>H} DEPT NMR (101 MHz, 298 K, C<sub>6</sub>D<sub>6</sub>):** 134.92 ppm.

**<sup>13</sup>C{<sup>1</sup>H} NMR (101 MHz, 298 K, CDCl<sub>3</sub>):** δ = 23.13, 23.97 (CH(CH<sub>3</sub>)<sub>2</sub>), 28.95 (CH(CH<sub>3</sub>)<sub>2</sub>), 114.56, 117.14 (NCHCHN), 123.61 (Ar-C), 129.03 (Ar-C), 135.35 (CNNCH<sub>2</sub>), 146.08, 146.93 (Ar-C), 151.43 (CNNCH<sub>2</sub>) ppm.

**IR (cm<sup>-1</sup>):** 3080, 2960, 2865.33, 1609, 1549.33, 1481.33, 1364, 1260.77, 793.33, 681.35.

**HRMS:** *m/z* calcd for [M+H]<sup>+</sup> C<sub>28</sub>H<sub>39</sub>N<sub>4</sub>, 431.31; found **431.31** for C<sub>28</sub>H<sub>39</sub>N<sub>4</sub>.

**Melting point range:** 105-110 °C.

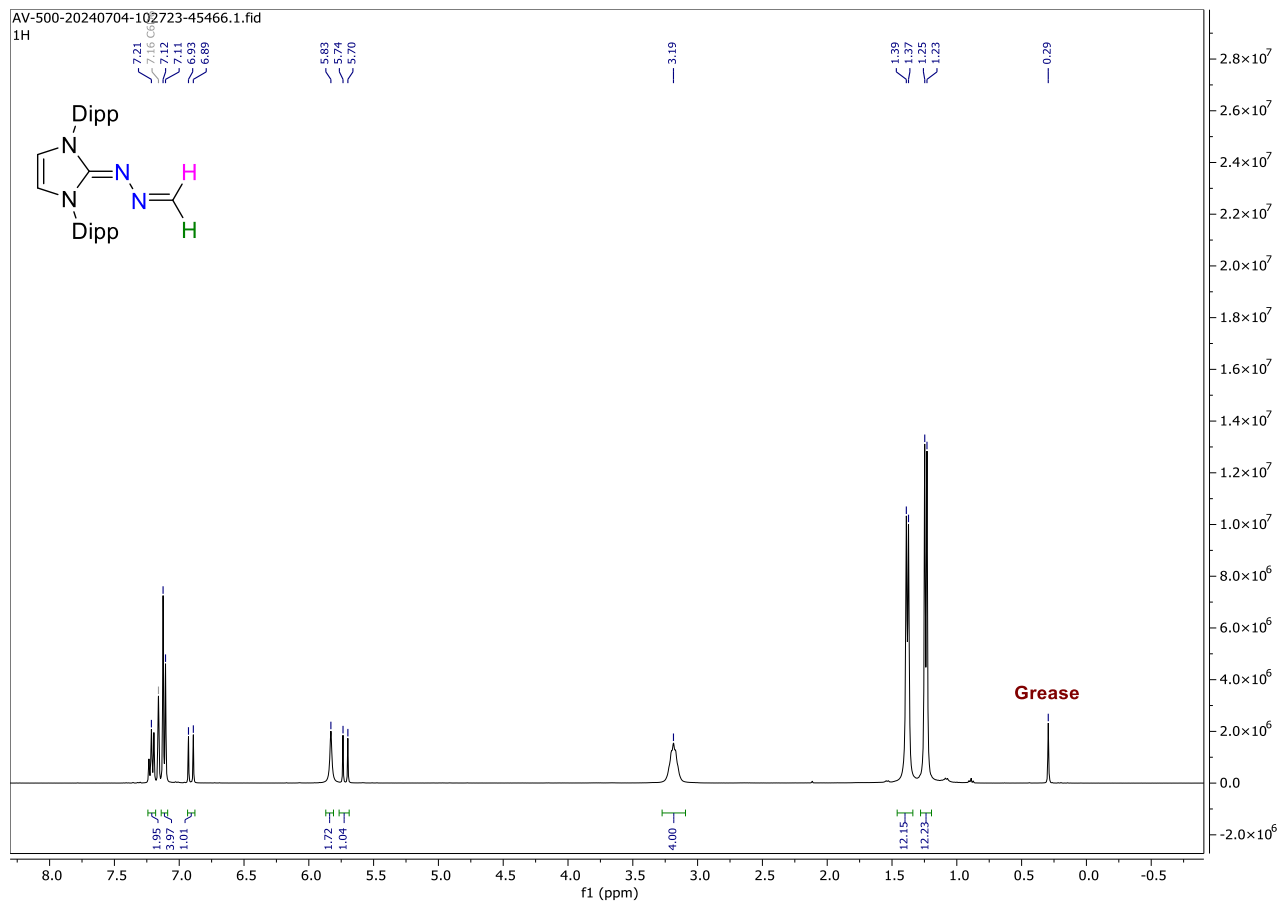

Figure S19: <sup>1</sup>H NMR of 5

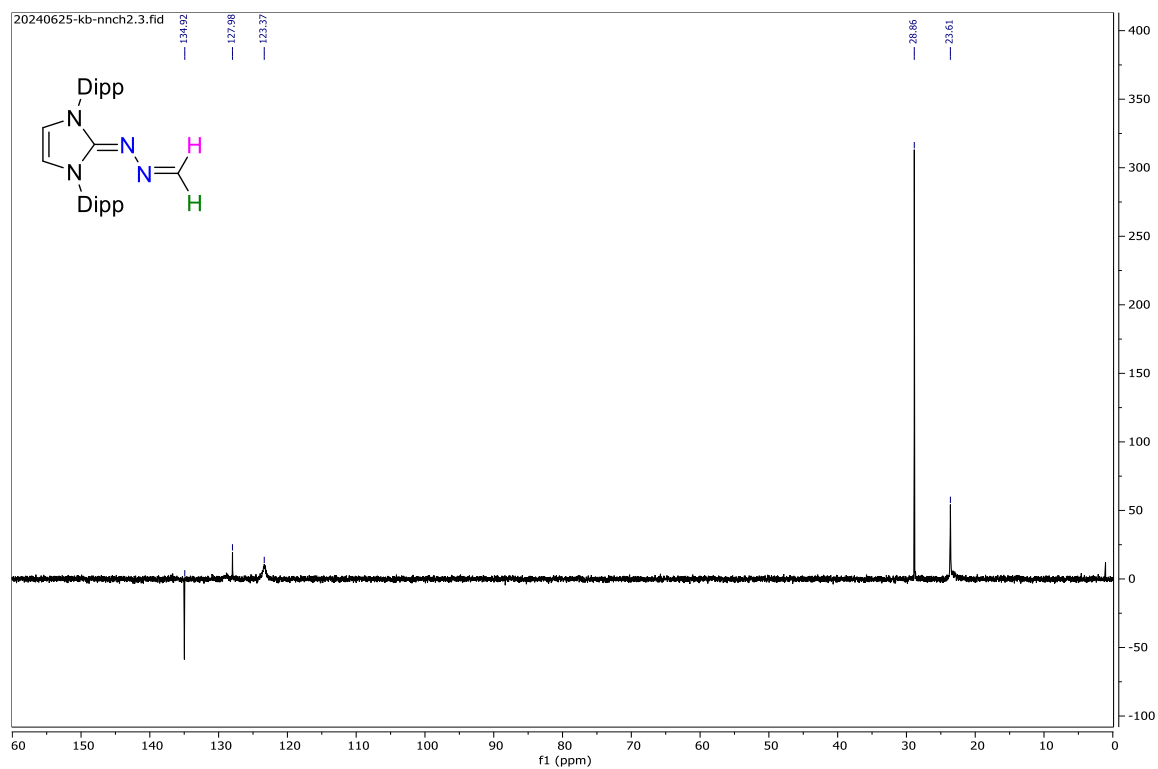

Figure S20: <sup>13</sup>C{<sup>1</sup>H} DEPT NMR of 5



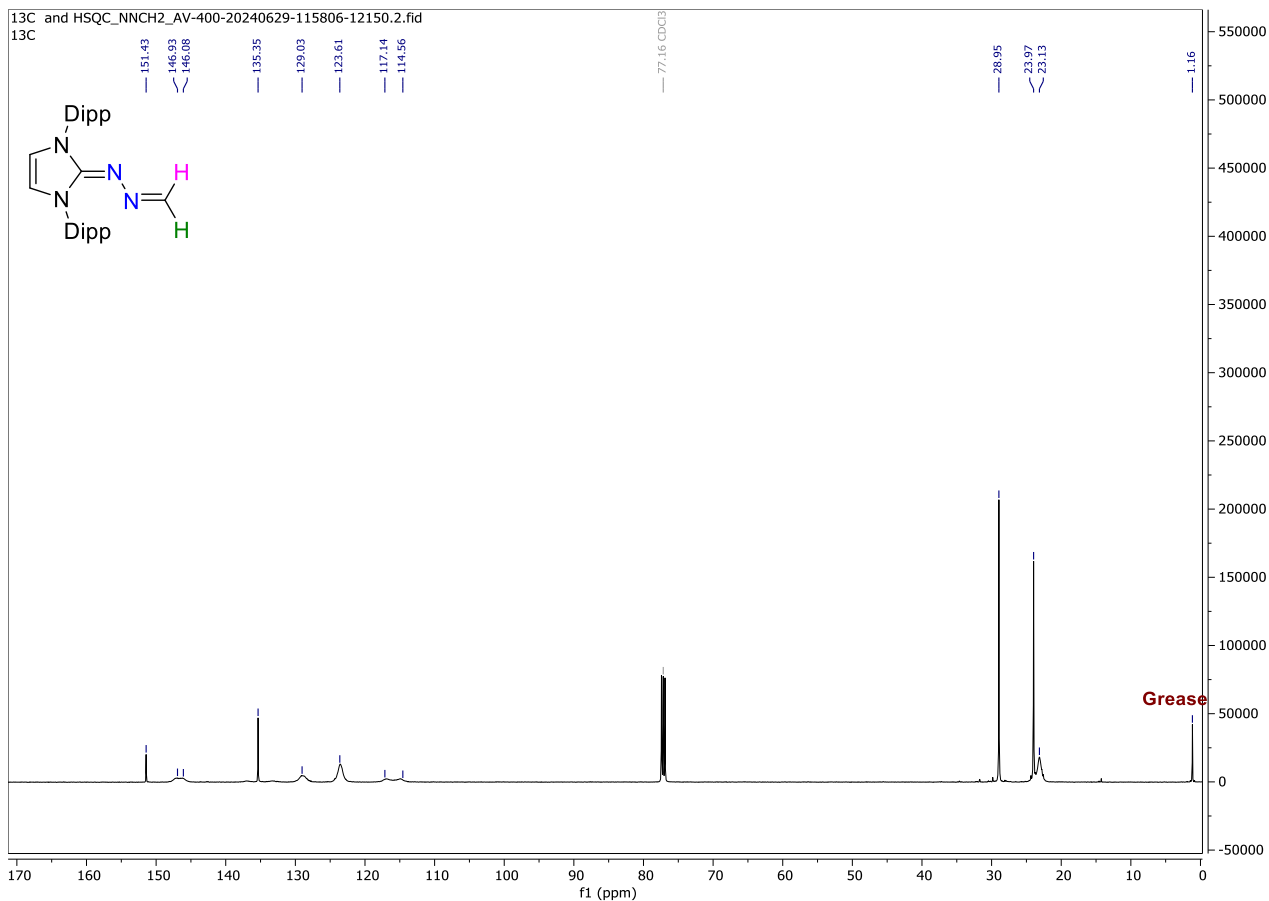

Figure S21: <sup>13</sup>C{<sup>1</sup>H} NMR of 5

KB-4 #314 RT: 1.40 AV: 1 NL: 1.72E10  
T: FTMS + p ESI Full ms [100.0000-1500.0000]

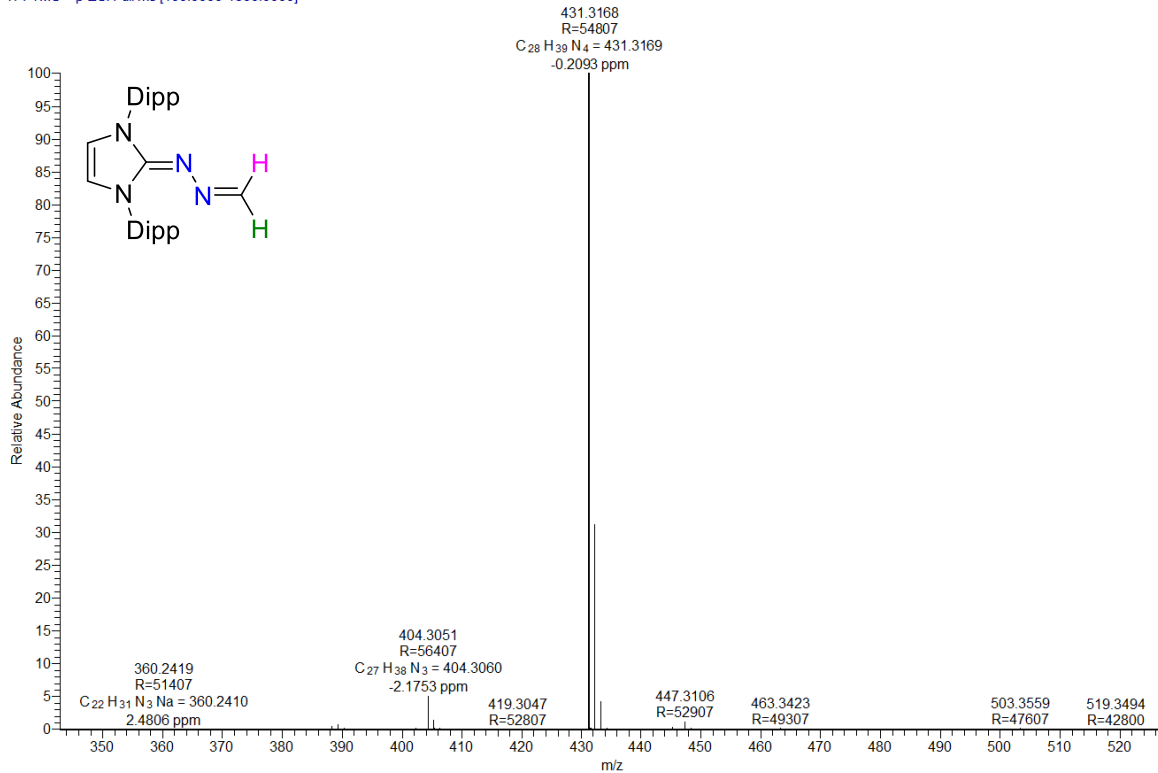

Figure S22: HRMS of 5

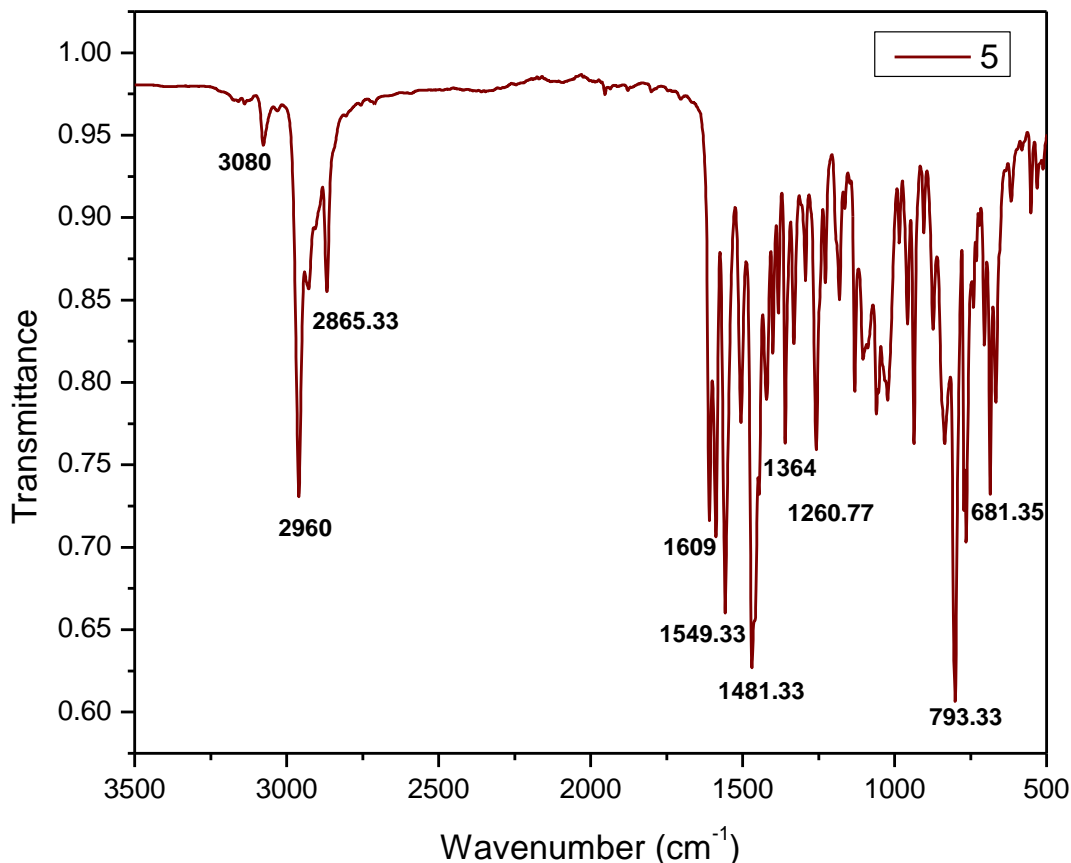

**Figure S23:** IR spectrum of **5**

#### Synthesis of **5a**:

##### **Method 1: By treating 4 with HCl (0.5 eq.-1.1 eq.)**

**4** (0.100 g, 0.19 mmol) was dissolved in 12 mL toluene in a round bottom flask. After that, 4 M HCl in dioxane (0.05 mL, 0.21 mmol) was added to it at room temperature, resulting in the formation of precipitate within an hour. The reaction was run for 12 hours. Completely removed all the volatiles to give a white-colored solid. After that, 10 mL hexane was added to it for washing and stirred for 15 min. Decanted the hexane part and completely dried the precipitate part to get pure product, **5a** in 91% yield. Suitable crystals for XRD analysis were grown by slow evaporation of DCM and hexane mixture in air at room temperature.

##### **Method 2: By treating 5 with 1.1 eq. HCl**

**5** (0.060 g, 0.14 mmol) was dissolved in 7 mL toluene in a round bottom flask. After that, 4 M HCl in dioxane (0.04 mL, 0.15 mmol) was added to it at room temperature. The reaction was run for 12 hours. All the volatiles were completely removed, followed by a hexane wash to give the pure product **5a**.

**<sup>1</sup>H NMR (400 MHz, 298 K, CDCl<sub>3</sub>):**  $\delta$  = 1.19-1.23 (dd,  $J$  = 3.88 Hz, 24 H, CH(CH<sub>3</sub>)<sub>2</sub>), 2.58 (sept,  $J$  = 6.75 Hz, 4 H, CH(CH<sub>3</sub>)<sub>2</sub>), 5.98 (d, 1 H,  $J$  = 11.26 Hz,

NNCH<sub>2</sub>), 6.78 (singlet, 2 H, NCHCHN), 7.24 (d, 4 H, Ar-H), 7.25 (t, 2 H, Ar-H), 7.94 (d, 1 H, *J* = 11.26 Hz, NNCH<sub>2</sub>), 13.88 (N<sup>+</sup>H) ppm.

**<sup>13</sup>C{<sup>1</sup>H} NMR (101 MHz, 298 K, CDCl<sub>3</sub>):** δ = 23.04, 24.21 (CH(CH<sub>3</sub>)<sub>2</sub>), 29.30 (CH(CH<sub>3</sub>)<sub>2</sub>), 119.41 (NCHCHN), 124.60 (Ar-C), 130.69 (Ar-C), 131.34 (Ar-C), 141.77 (Ar-C), 144.62 (CNNCH<sub>2</sub>), 145.35 (CNNCH<sub>2</sub>) ppm.

**IR (cm<sup>-1</sup>):** 2958.78, 2868.06, 1614.44, 1455.68, 1383.51, 1212.38, 1030.93, 806.19, 698.97.

**HRMS:** *m/z* calcd for [M]<sup>+</sup>[Cl]<sup>-</sup> C<sub>28</sub>H<sub>39</sub>N<sub>4</sub>Cl, 466.29; found **431.31** for C<sub>28</sub>H<sub>39</sub>N<sub>4</sub>.

**Melting point range:** 184-188 °C.

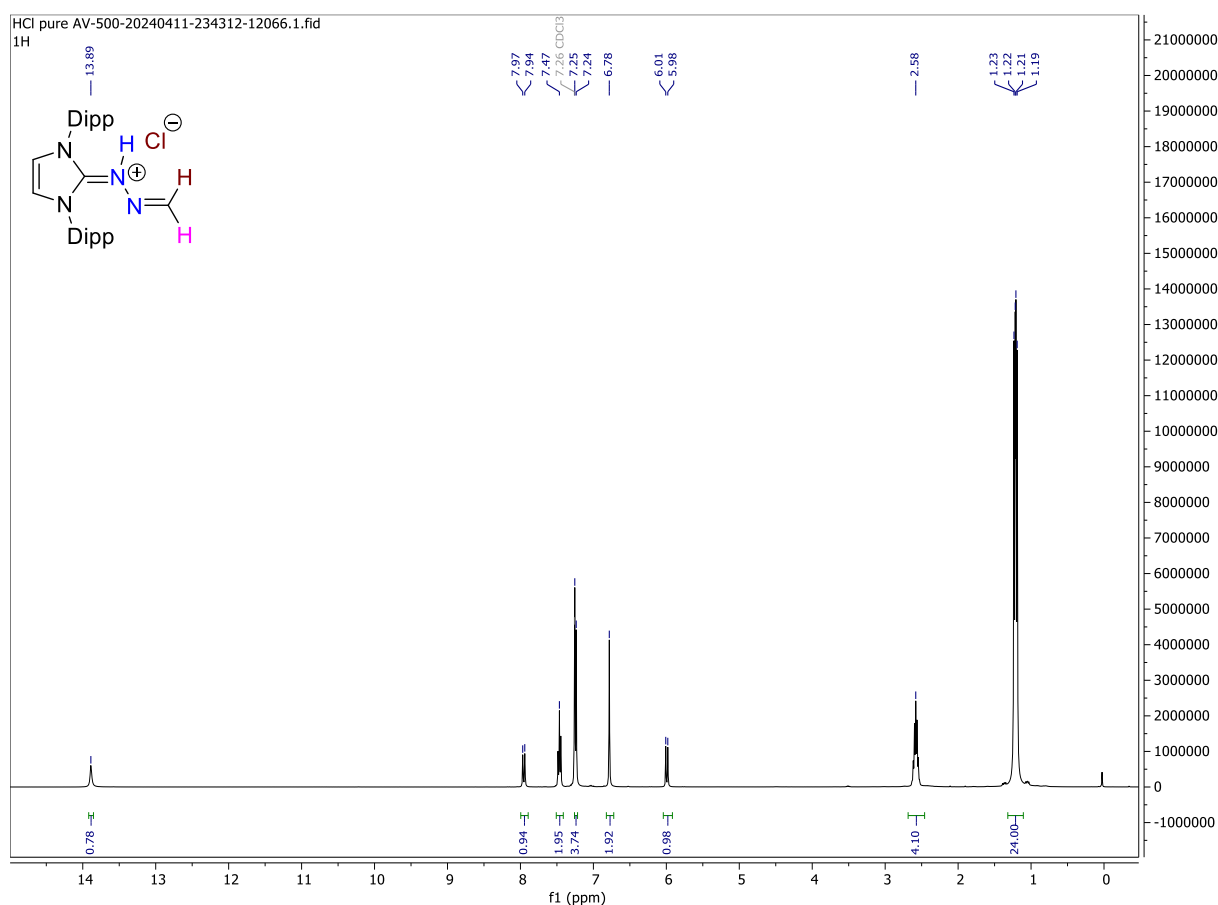

Figure S24: <sup>1</sup>H NMR spectrum of **5a**

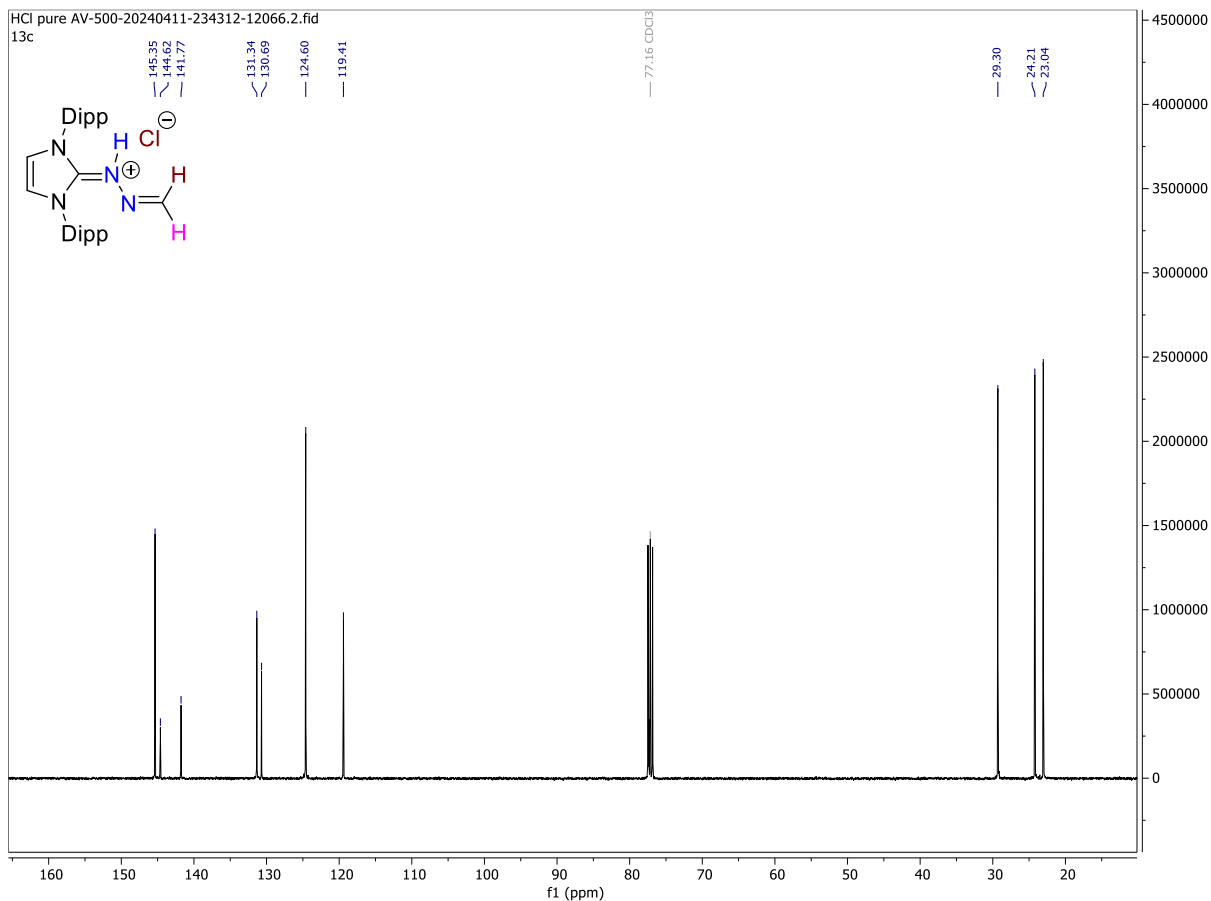

Figure S25:  $^{13}\text{C}\{^1\text{H}\}$  NMR spectrum of 5a

KB-4 #263 RT: 1.17 AV: 1 NL: 4.61E9  
T: FTMS + p ESI Full ms [100.0000-1500.0000]

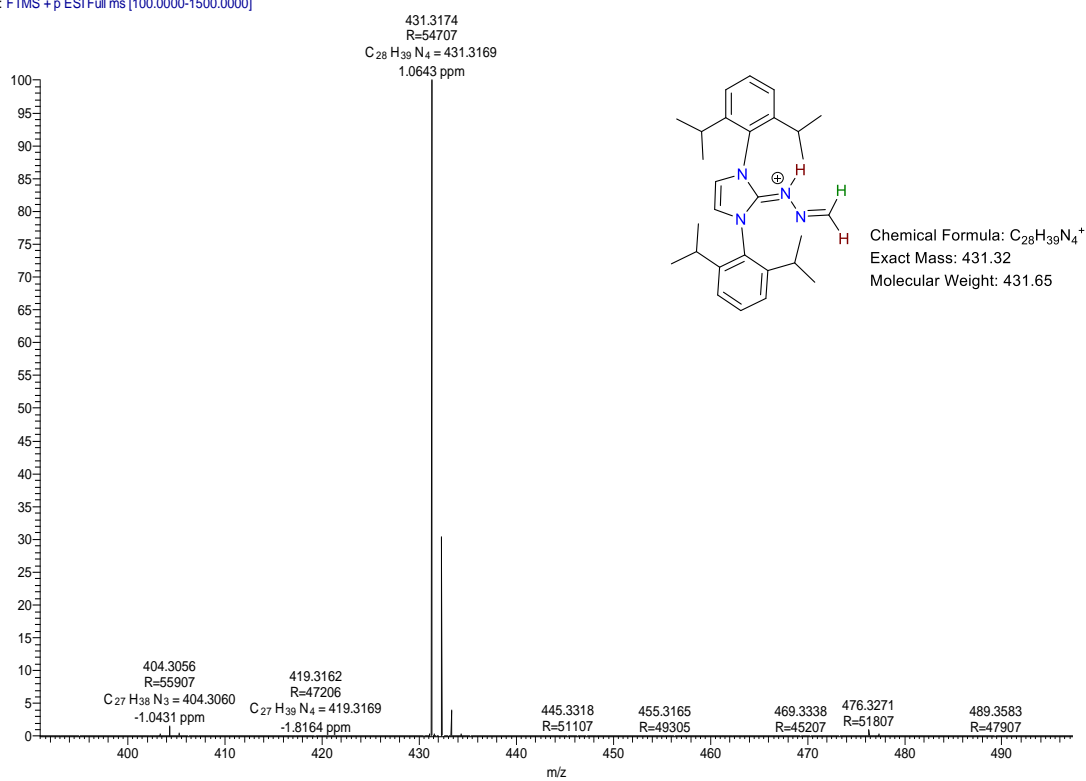

Figure S26: HRMS spectrum of 5a

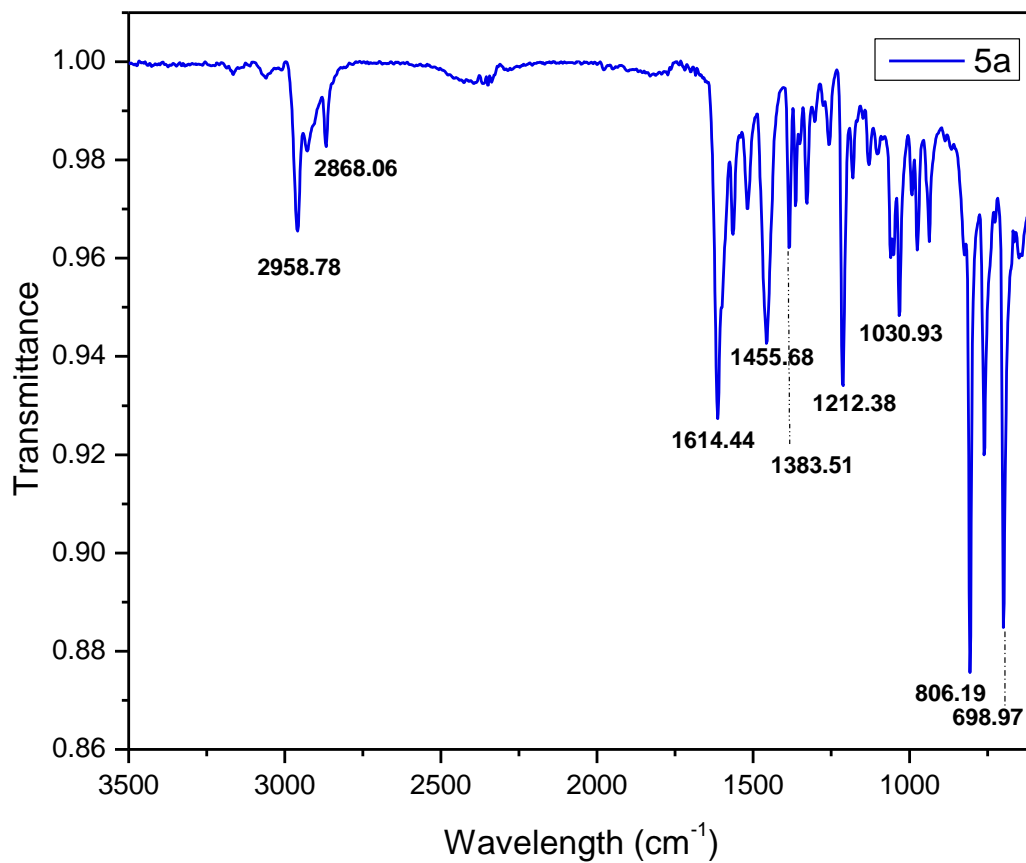

**Figure S27:** IR (ATR) spectrum of **5a**

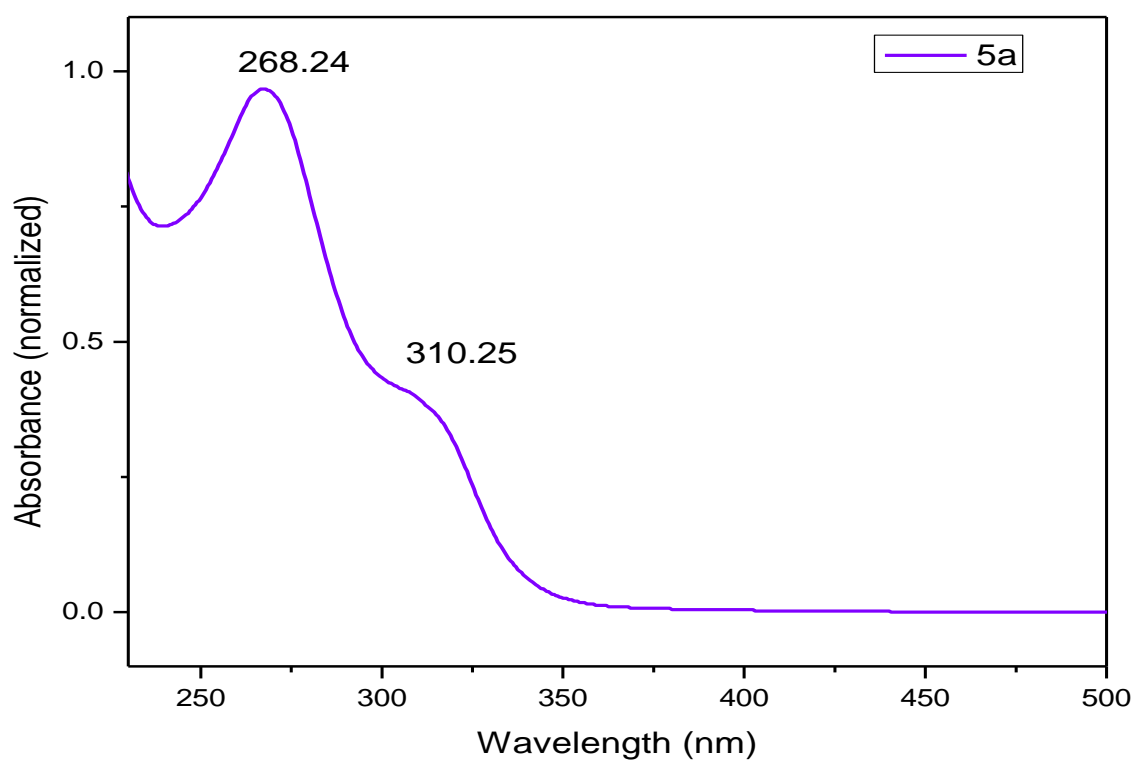

**Figure S28:** UV-VIS spectrum of **5a** in THF

**Synthesis of 6 and 7:** 5-*t*Bu (0.200 g, 1.10 mmol) was dissolved in 10 mL hexane in a Schlenk flask and kept at -36 °C for 10 min. After that, SiMe<sub>3</sub>CHN<sub>2</sub> (1.84 mL, 1.10 mmol) was added to the solution resulting in a deep red-colored solution along with the formation of a yellow-colored precipitate. The reaction was run for 12 hours while slowly warming to room temperature. The solution was filtered using a cannula and completely dried the precipitate part followed by toluene wash to get the pure product **6** with a yield of 21%.

Suitable crystals were grown by concentrating the filtrate to 3 mL when the reaction was performed in toluene and stored at room temperature to get red-colored crystals **6** after 2 days.

<sup>1</sup>H NMR of the filtrate part in C<sub>6</sub>D<sub>6</sub> shows the formation of a mixture of products comprising both **6** and **7**. Suitable crystals of **7** for XRD analysis were grown from the NMR tube itself after keeping it at room temperature for a week.

However, compound **7** could not be isolated and well-characterized. Also, it was difficult to predict the yield of **7** as the filtrate part comprised a mixture of both **6** and **7**.

**<sup>1</sup>H NMR of 6 (400 MHz, 298 K, CDCl<sub>3</sub>):** 1.48 (singlet, 18 H, C(CH<sub>3</sub>)<sub>3</sub>), 7.37 (singlet, 2 H, NCHCHN), 8.27 (CNCHNN) ppm.

**<sup>13</sup>C{<sup>1</sup>H} NMR of 6 (125.7 MHz, 298 K, CDCl<sub>3</sub>):** 30.21 (C(CH<sub>3</sub>)<sub>3</sub>), 63.41(C(CH<sub>3</sub>)<sub>3</sub>), 118.22 (NCHCHN), 143.99 (NCN), 146.09 (CNCHNN), 152.50 (CNCHNN) ppm.

**IR (cm<sup>-1</sup>) of 6:** 3094.91, 2971.19, 1571.16, 1439.20, 1375.28, 1321.67, 1185.59, 981.46, 849.50, 732.72.

**HRMS of 6:** m/z calcd for [M+H]<sup>+</sup> C<sub>13</sub>H<sub>22</sub>N<sub>5</sub>, 248.18; found **248.18**.

**Melting point range of 6:** 209-214 °C.

**<sup>29</sup>Si of 7 (79.49 MHz, 298 K, C<sub>6</sub>D<sub>6</sub>):** -10.32 ppm

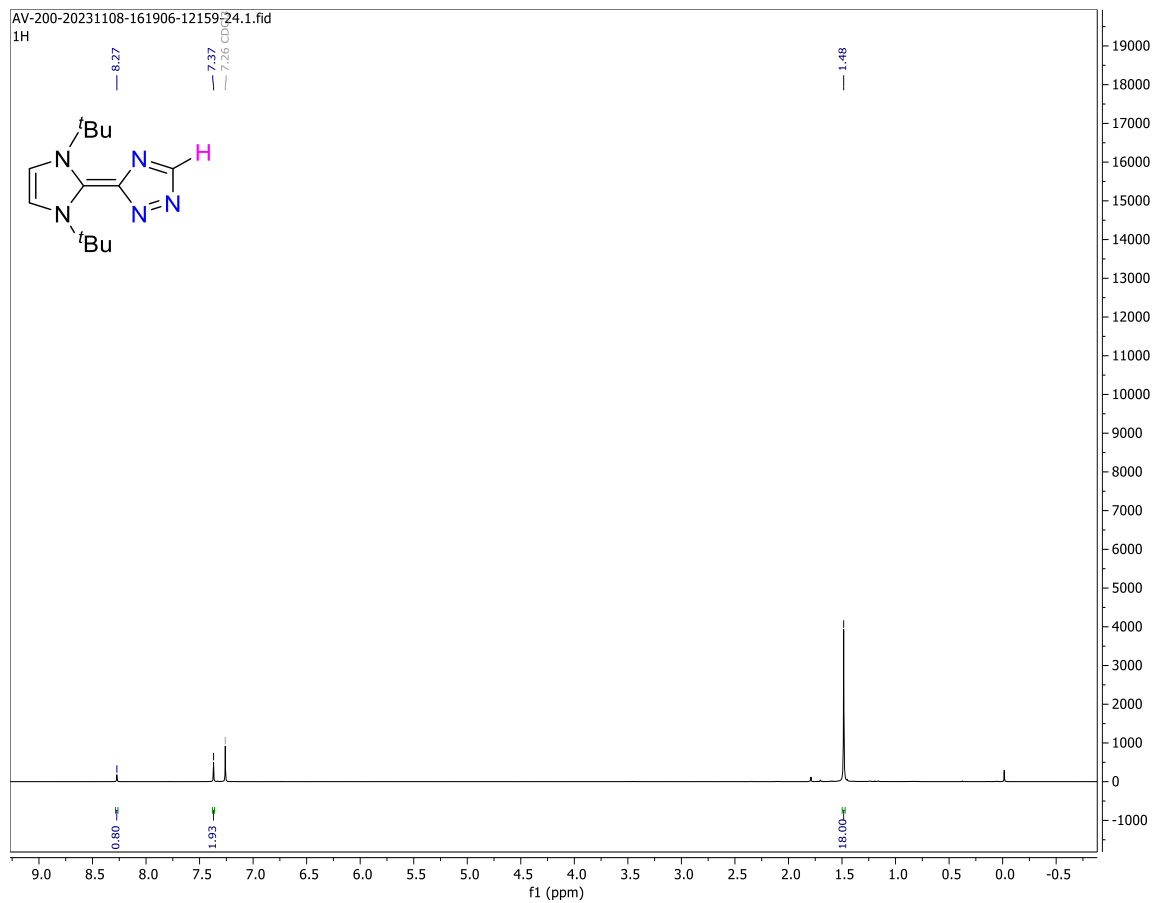

Figure S29:  $^1\text{H}$  NMR spectrum of **6**

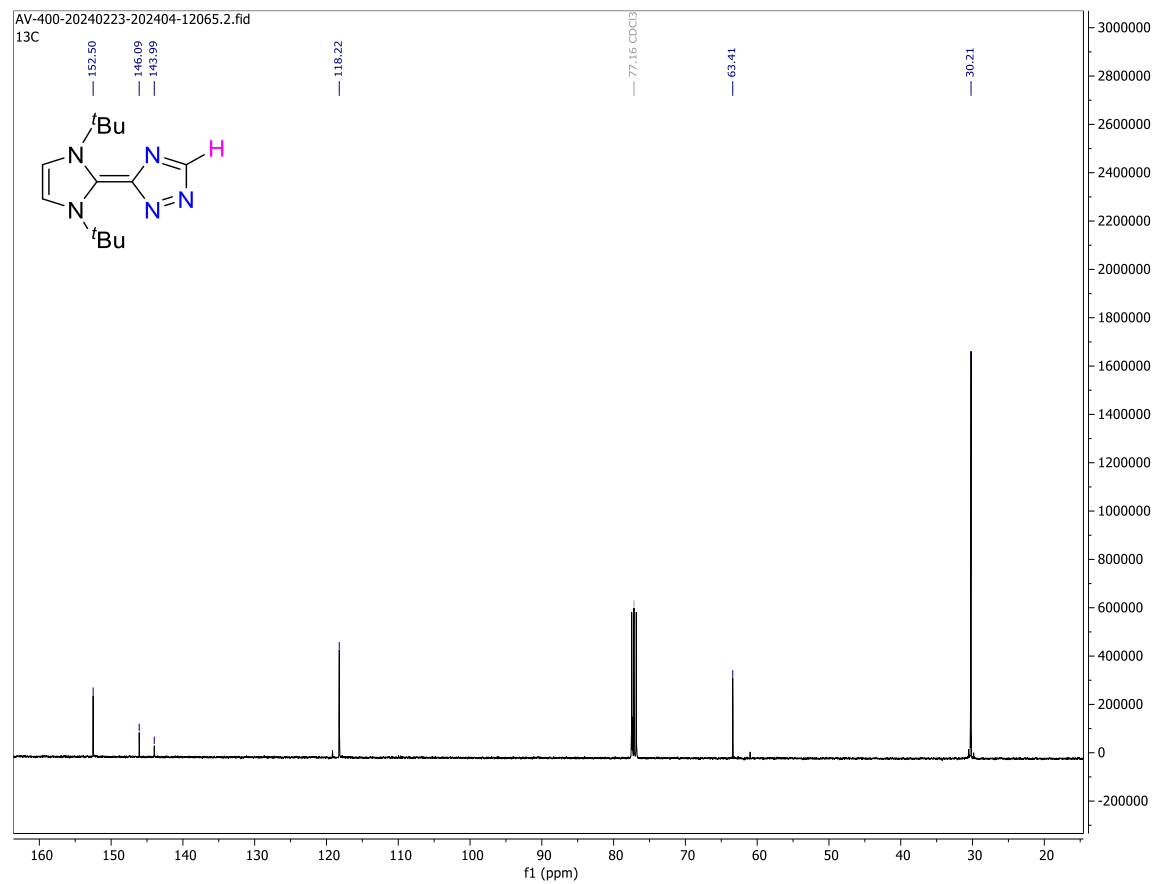

Figure S30:  $^{13}\text{C}\{^1\text{H}\}$  NMR spectrum of **6**

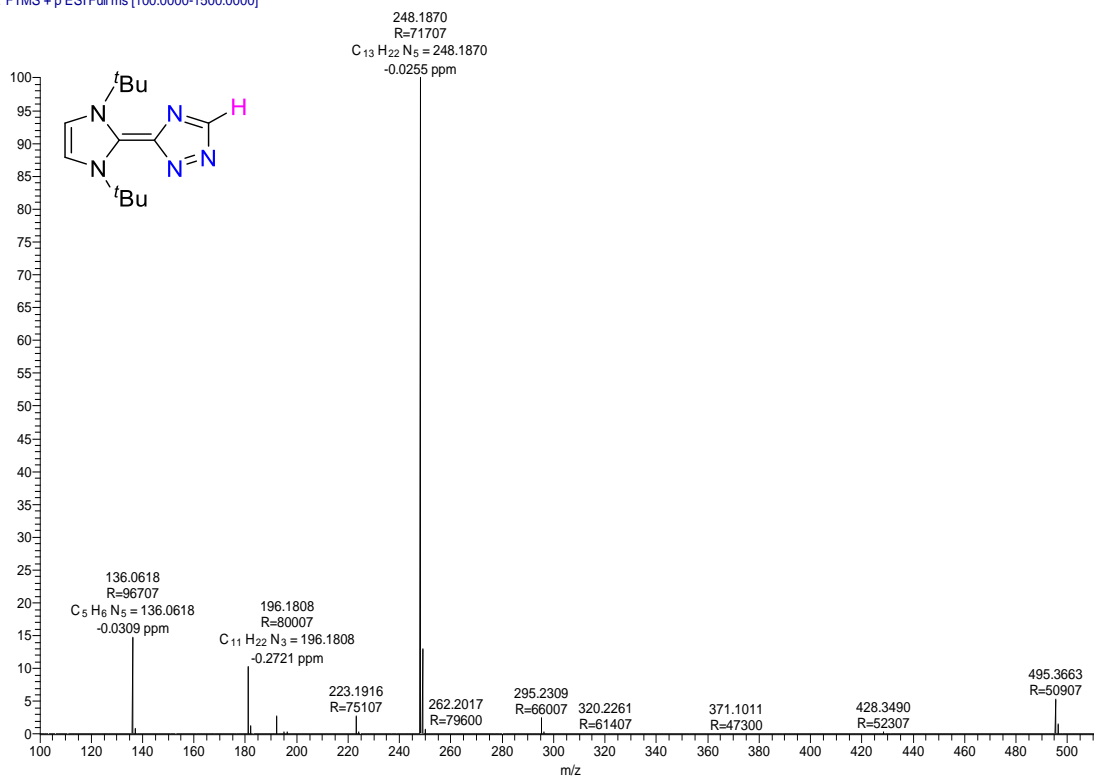

Figure S31: HRMS spectrum of 6

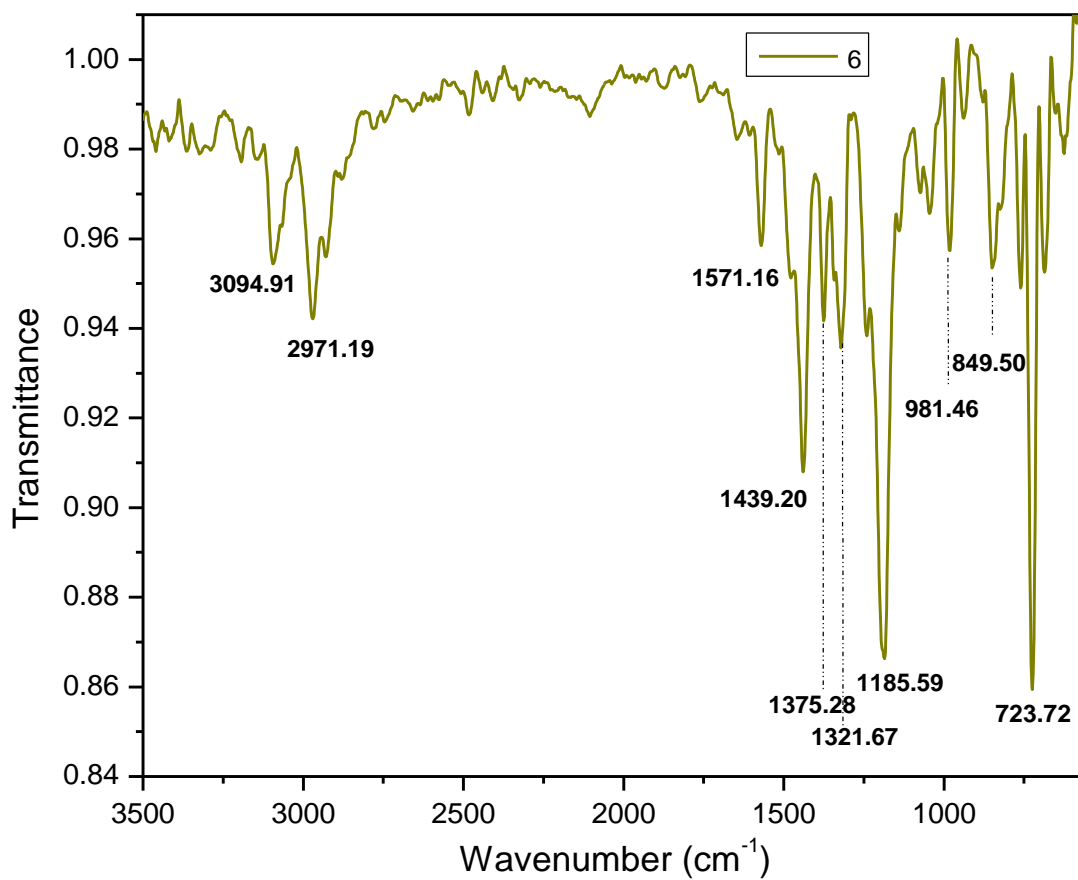

Figure S32: IR (ATR) spectrum of 6



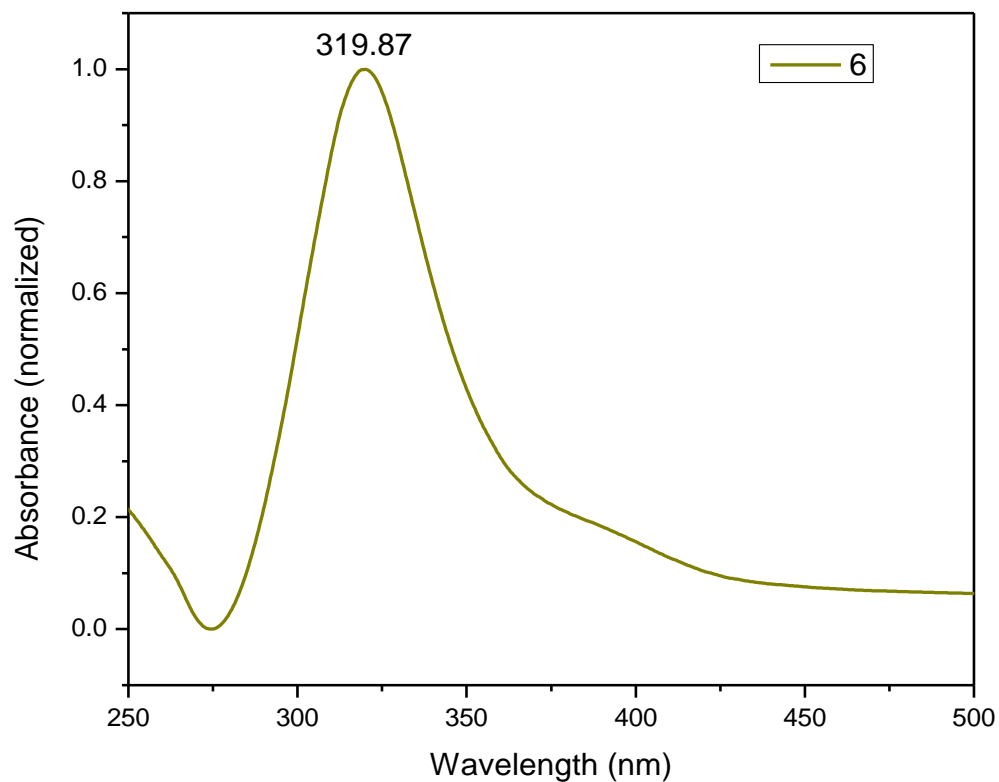

**Figure S33: UV-VIS spectrum of 6**

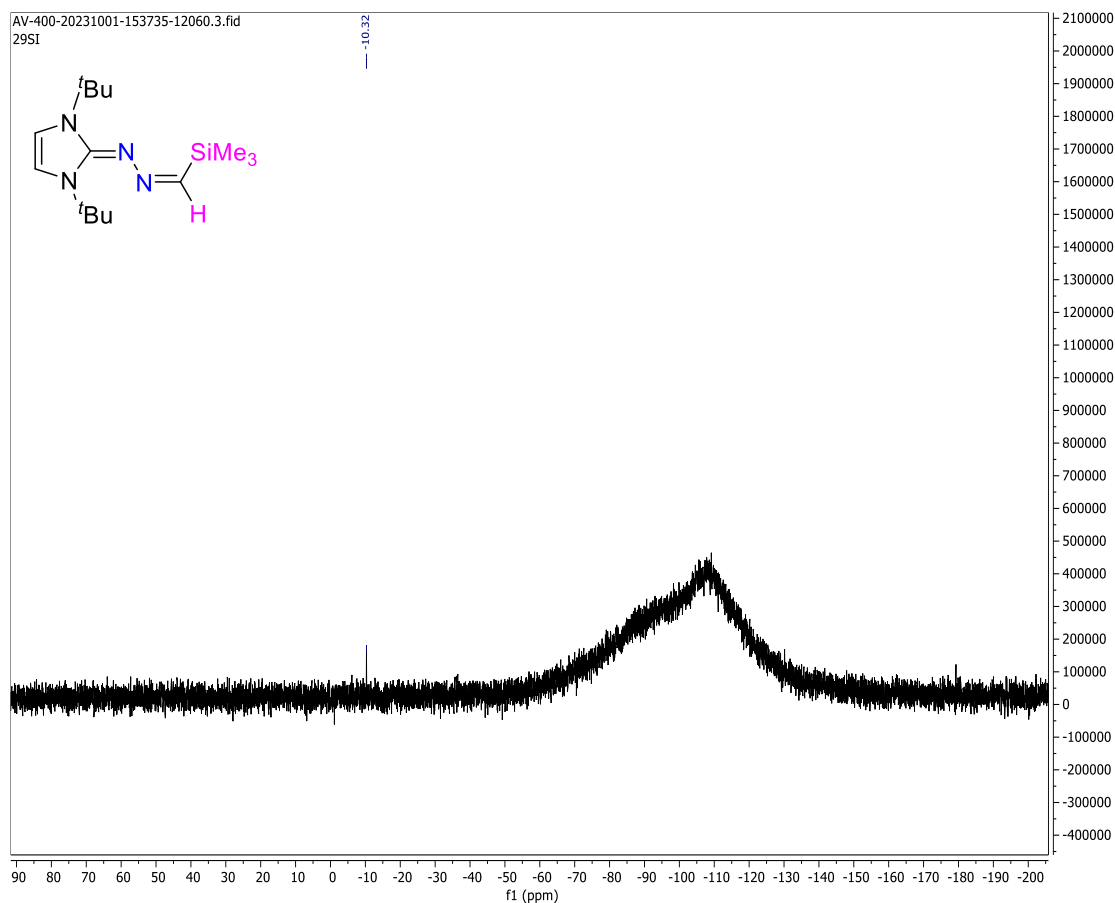

**Figure S34:  $^{29}\text{Si}\{^1\text{H}\}$  NMR spectrum of 7**

**Synthesis of 7a:** 5-*t*Bu carbene (0.120 g, 0.66 mmol) was dissolved in 8 mL toluene in a Schlenk flask. After that, SiMe<sub>3</sub>CHN<sub>2</sub> (1.1 mL, 0.66 mmol) and degassed water (0.01 mL, 0.66 mmol) were added to it at room temperature. The reaction was stirred for 12 hours, resulting in a yellow-colored solution. The solution was filtered using a cannula. All the volatiles were completely removed to afford the pure dark yellow-colored sticky solid **7a**, which gets solidified upon keeping the flask in a glovebox within 24 h with a yield of 75%.

Suitable crystals for XRD analysis were grown from the saturated solution of toluene at room temperature.

**Note:** The reaction requires the precise addition of water, as excess water can lead to the formation of a mixture of decomposed products of carbene and **7a**.

**<sup>1</sup>H NMR (500 MHz, 298 K, C<sub>6</sub>D<sub>6</sub>):** δ = 1.54 (singlet, 18 H, C(CH<sub>3</sub>)<sub>3</sub>), 6.08 (singlet, 2 H, NCHCHN), 6.33 (d, 1 H, *J* = 15.13 Hz, NNCH<sub>2</sub>), 7.40 (d, 1 H, *J* = 15.13 Hz, NNCH<sub>2</sub>) ppm.

**<sup>13</sup>C{<sup>1</sup>H} DEPT NMR (125.7 MHz, 298 K, C<sub>6</sub>D<sub>6</sub>):** 130.35 ppm.

**<sup>13</sup>C{<sup>1</sup>H} NMR (125.7 MHz, 298 K, C<sub>6</sub>D<sub>6</sub>):** δ = 29.83 (C(CH<sub>3</sub>)<sub>3</sub>), 57.04 (C(CH<sub>3</sub>)<sub>3</sub>), 109.42 (NCHCHN), 130.73 (CNNCH<sub>2</sub>), 152.71 (CNNCH<sub>2</sub>) ppm.

**IR (cm<sup>-1</sup>):** 3177.34, 3057.75, 2962.91, 1513.41, 1445.31, 1385.47, 1187.63, 1012.37, 903.09, 643.30.

**HRMS:** *m/z* calcd for [M+H]<sup>+</sup> C<sub>12</sub>H<sub>23</sub>N<sub>4</sub>, 223.18; found 223.19.

**Melting point range:** 55-60 °C.

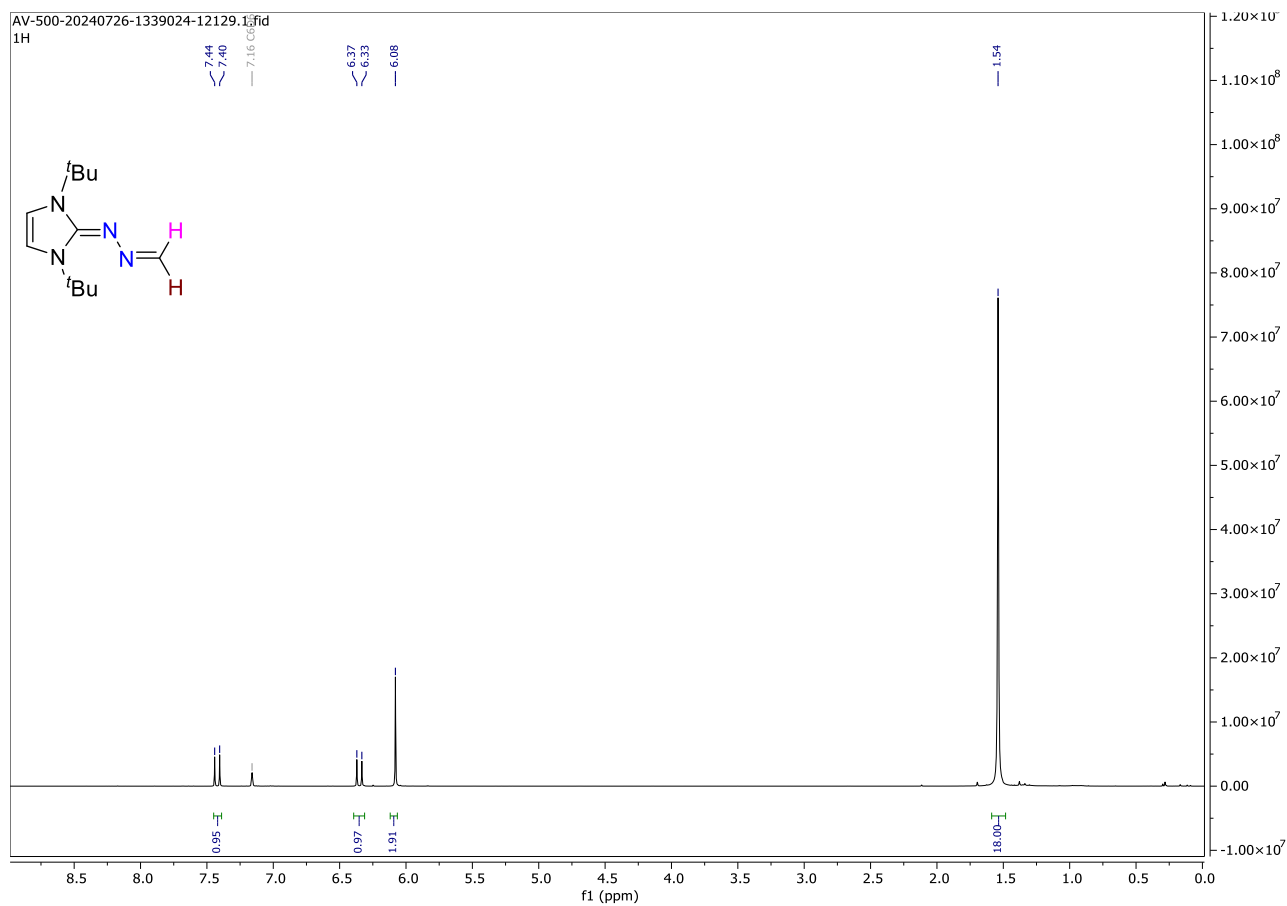

Figure S35:  $^1\text{H}$  NMR of 7a

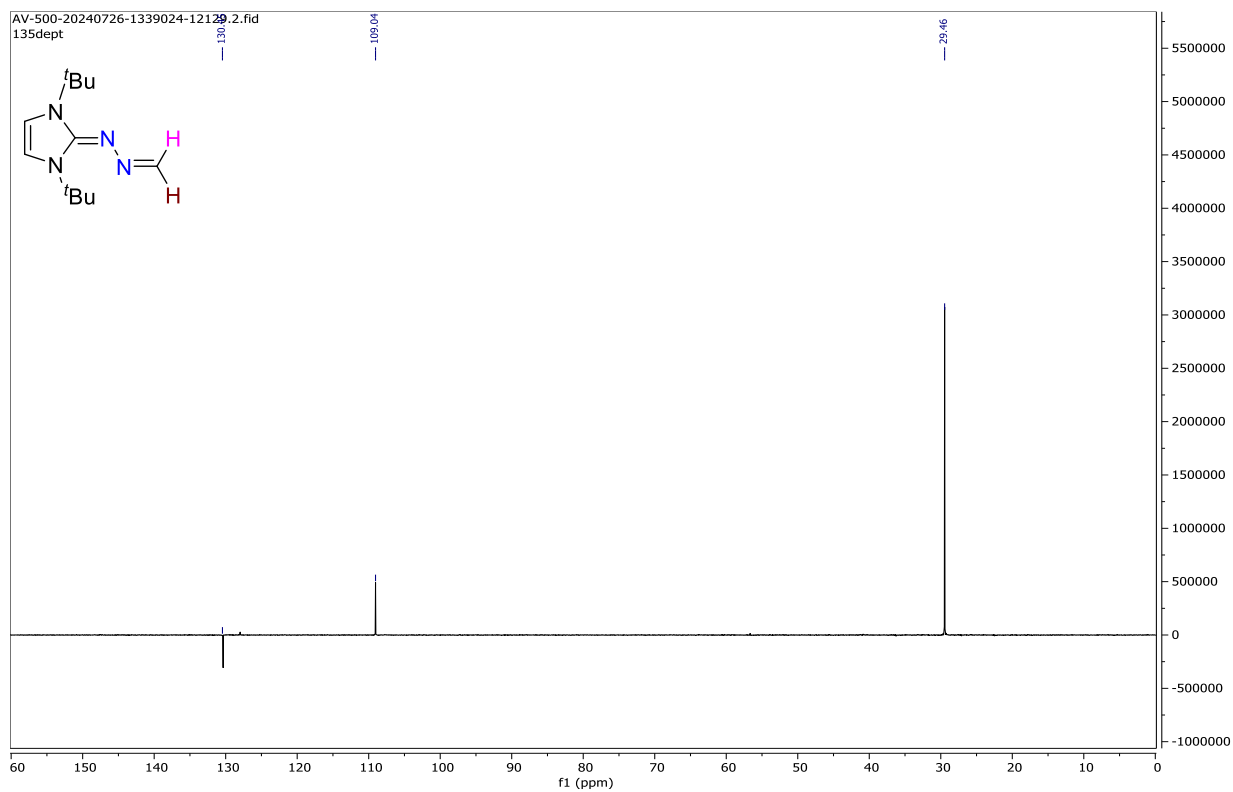

Figure S36:  $^{13}\text{C}\{^1\text{H}\}$  DEPT NMR of 7a

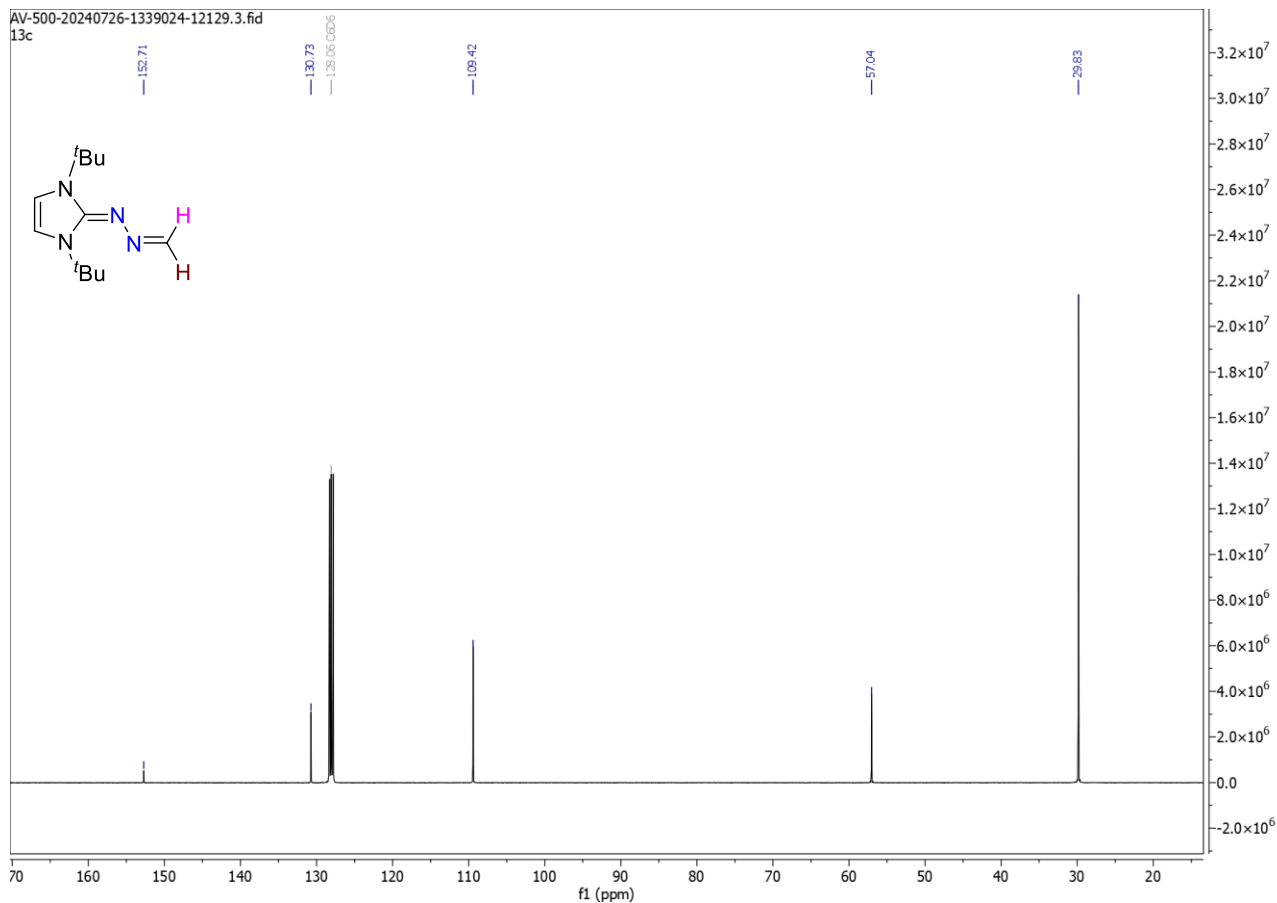

Figure S37:  $^{13}\text{C}\{^1\text{H}\}$  NMR of 7a

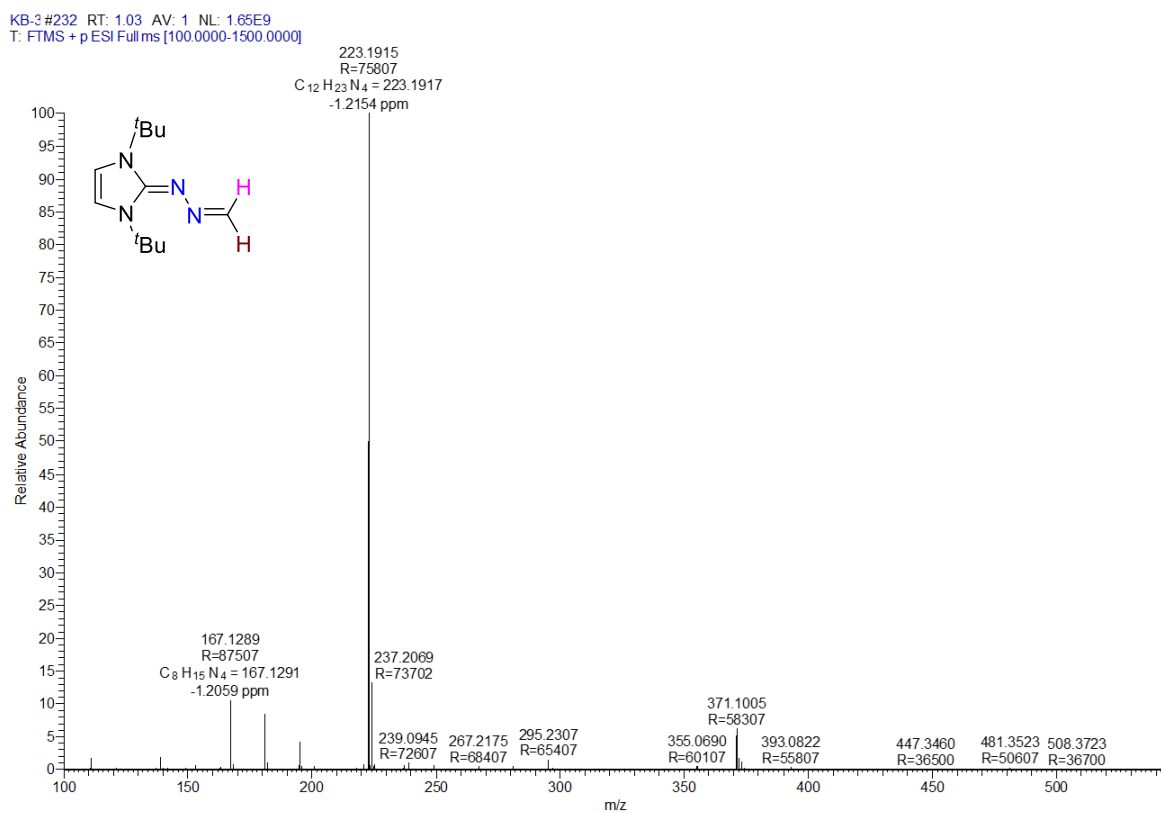

Figure S38: HRMS of 7a

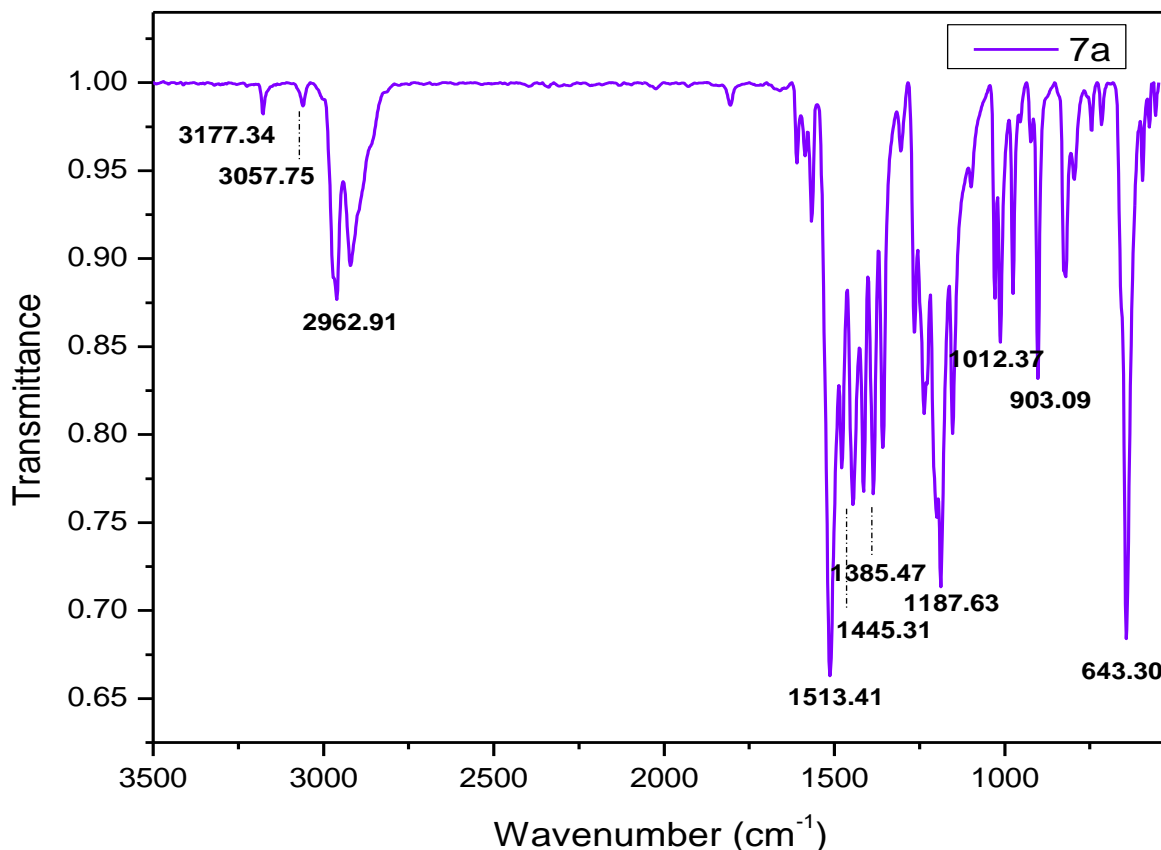

**Figure S39:** ATR(IR) spectrum of **7a**

**Synthesis of 8:** DAC.OTf salt (0.300 g, 0.50 mmol) and NaHMDS (0.094 g, 0.51 mmol) were taken together and dissolved in 20 mL toluene at room temperature. The reaction was run for 30 min. Filtered the solution using frit and kept the Schlenk flask at  $-36\text{ }^{\circ}\text{C}$ .  $\text{SiMe}_3\text{CHN}_2$  (1.08 mL, 0.65 mmol) was added to the filtrate at low temperature, resulting in a yellow-colored solution. The reaction was run for 20 hours while slowly warming to room temperature. All the volatiles were removed and the pure product was isolated using column chromatography in 5% ethylacetate and pet ether with a yield of 30%. The suitable crystals for XRD were grown from the crude mixture at room temperature in DCM and hexane mixture in air.

**$^1\text{H}$  NMR (400 MHz, 298 K,  $\text{CDCl}_3$ ):**  $\delta$  = -0.24 (singlet, 9 H,  $\text{Si}(\text{CH}_3)_3$ ), 1.17 (dd merged,  $J$  = 7.38 Hz, 12 H,  $\text{CH}(\text{CH}_3)_2$ ), 1.22 (dd,  $J$  = 3.63 Hz, 12 H,  $\text{CH}(\text{CH}_3)_2$ ), 1.73 (singlet, 6 H,  $(\text{OCC}(\text{CH}_3)_2)$ ), 2.91 (sept,  $J$  = 6.50 Hz, 4 H,  $\text{CH}(\text{CH}_3)_2$ ), 7.14 (d,  $J$  = 7.75 Hz, 2 H, Ar-H), 7.19 (singlet, 1 H,  $\text{NNCHSiMe}_3$ ), 7.23 (d,  $J$  = 7.75 Hz, 2 H, Ar-H), 7.35 (t,  $J$  = 7.75 Hz, 1 H, Ar-H), 7.41 (t,  $J$  = 7.75 Hz, 1 H, Ar-H).

**$^{13}\text{C}\{^1\text{H}\}$  NMR (101 MHz, 298 K,  $\text{CDCl}_3$ ):**  $\delta$  = -2.31 ( $\text{Si}(\text{CH}_3)_3$ ), 22.30-24.24 ( $\text{CH}(\text{CH}_3)_3$ ), 25.36 ( $\text{CH}(\text{CH}_3)_3$ ), 29.28, 29.35 ( $(\text{OCC}(\text{CH}_3)_2)$ ), 47.03 ( $(\text{COC}(\text{CH}_3)_2)$ ),

123.77 (Ar-C), 128.97 (Ar-C), 129.37 (Ar-C), 132.58(Ar-C), 133.85 (Ar-C), 137.21 (Ar-C), 145.15 (NNCHSiMe<sub>3</sub>), 168.56 (CNNCHSiMe<sub>3</sub>), 171.35, 172.08 (COC(CH<sub>3</sub>)<sub>2</sub>).

**<sup>29</sup>Si (79.49 MHz, 298 K, CDCl<sub>3</sub>):** -7.63 ppm

**HRMS:** m/z calcd for [M+H]<sup>+</sup> C<sub>34</sub>H<sub>51</sub>N<sub>4</sub>O<sub>2</sub>Si, 575.3703; found **575.37**.

**IR (cm<sup>-1</sup>):** 2962.11, 2051.56, 1690.73, 1608.23, 1385.57, 1352.58, 1250.49, 841.24, 789.26, 751.94.

**Melting point range:** 135-140 °C.

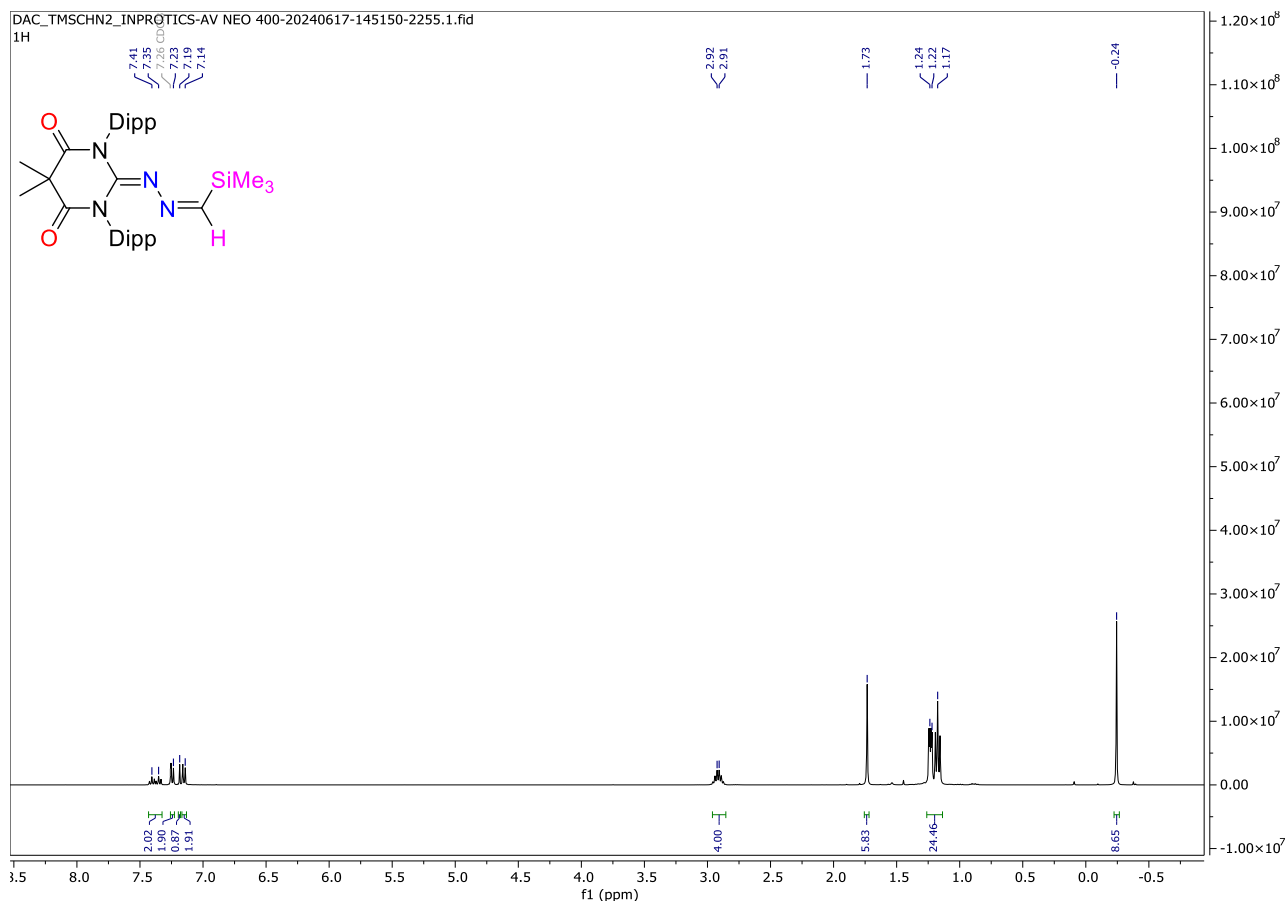

**Figure S40:** <sup>1</sup>H NMR spectrum of **8**

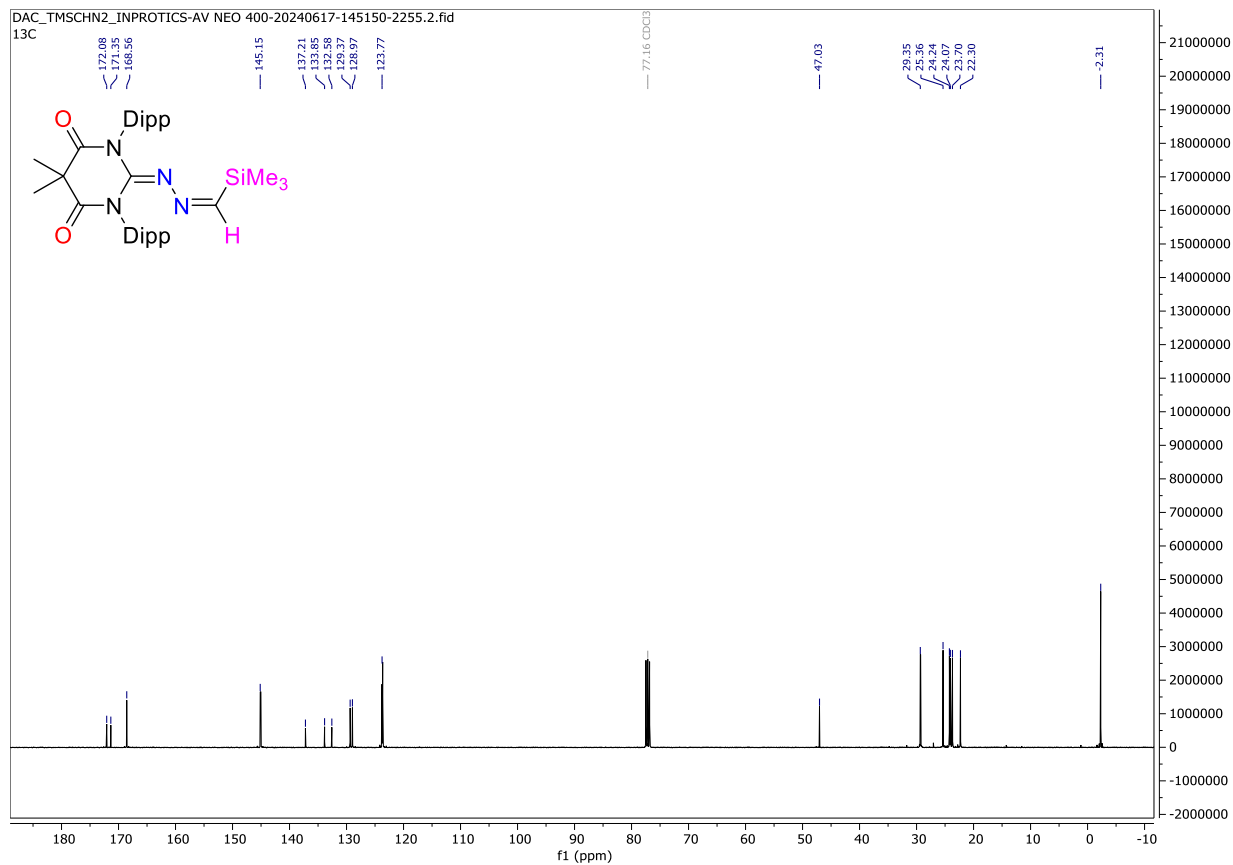

Figure S41:  $^{13}\text{C}\{^1\text{H}\}$  NMR spectrum of **8**

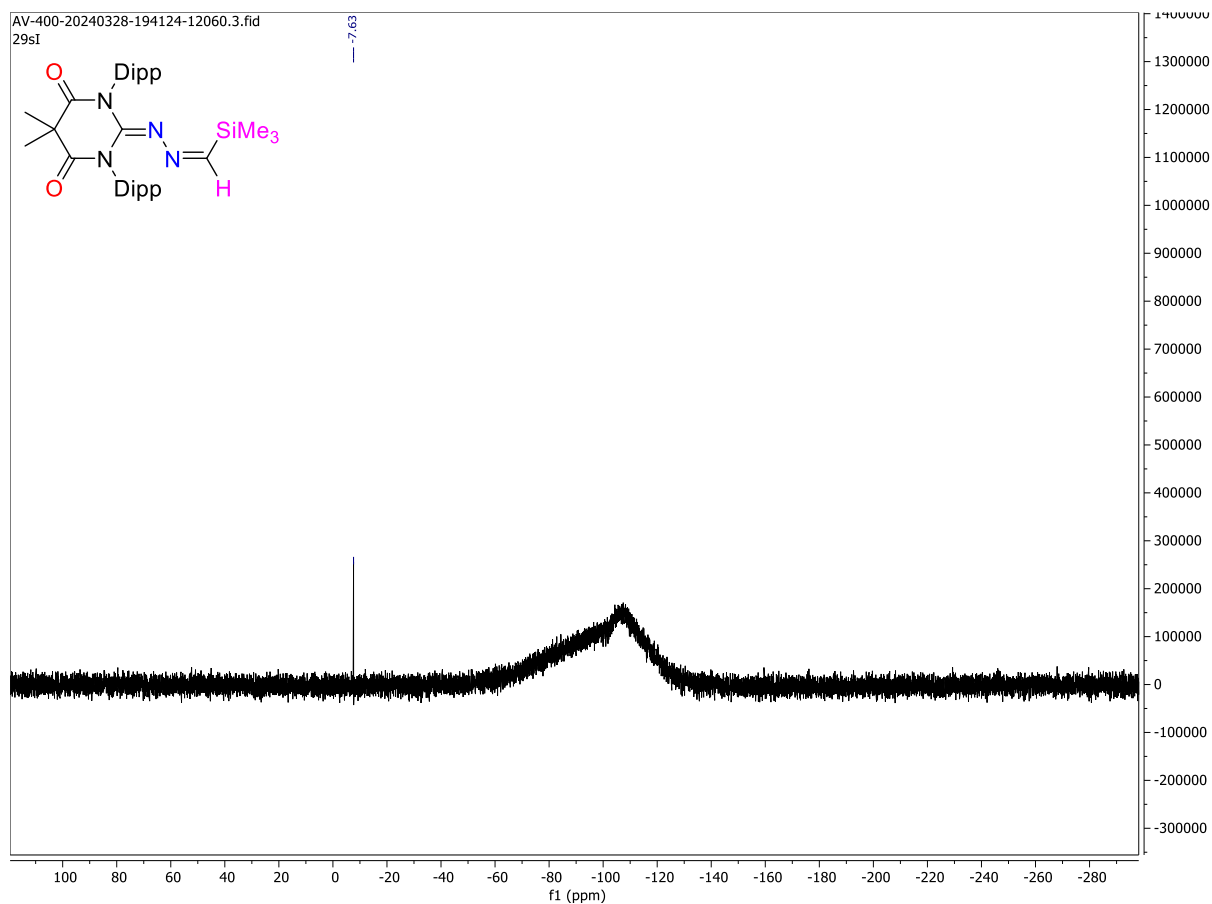

Figure S42:  $^{29}\text{Si}\{^1\text{H}\}$  NMR spectrum of **8**

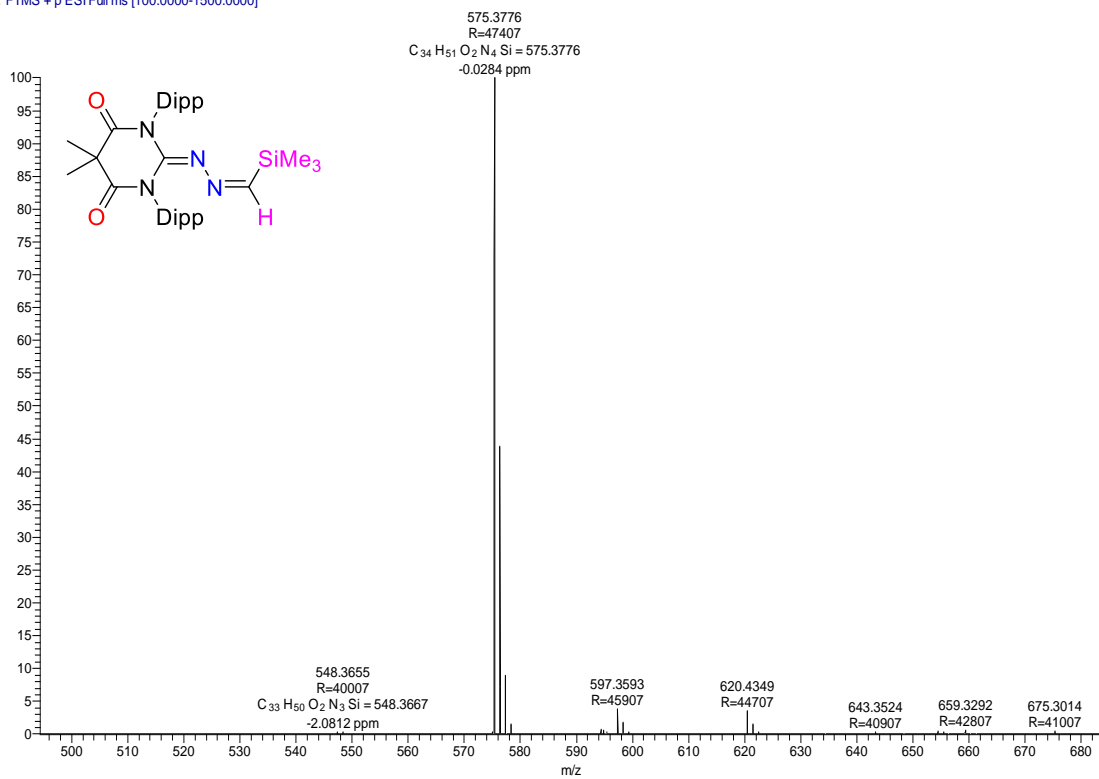

Figure S43: HRMS spectrum of 8

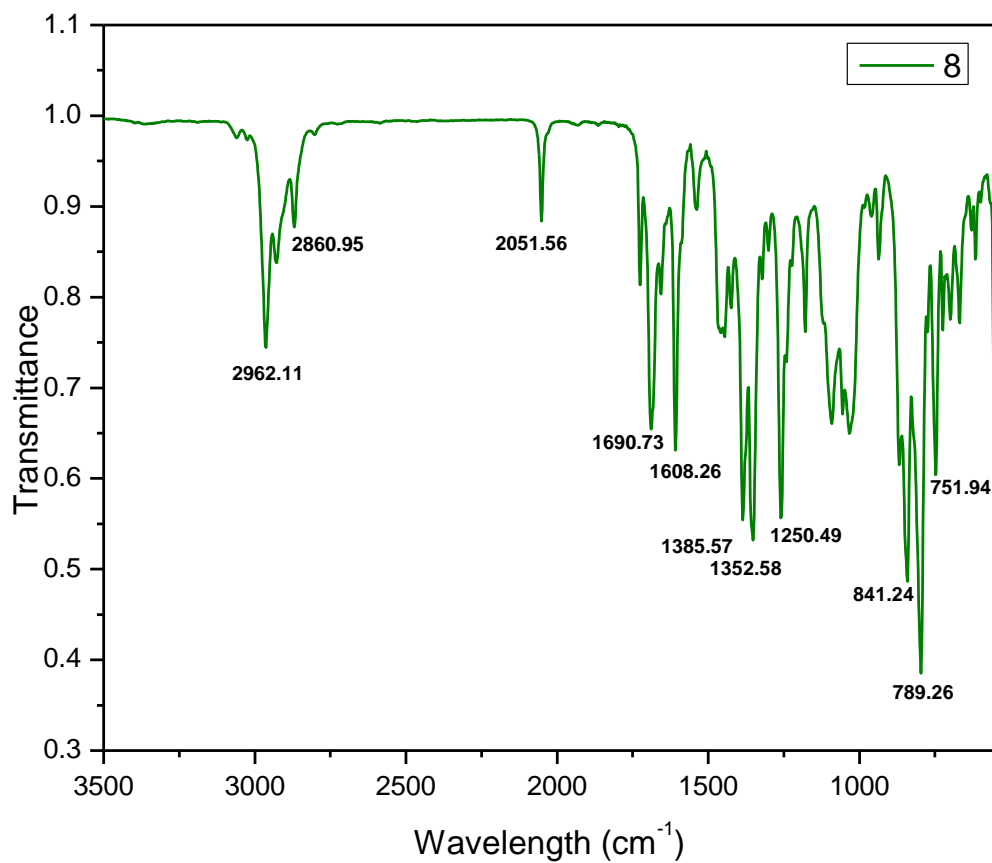

Figure S44: IR (ATR) spectrum of 8



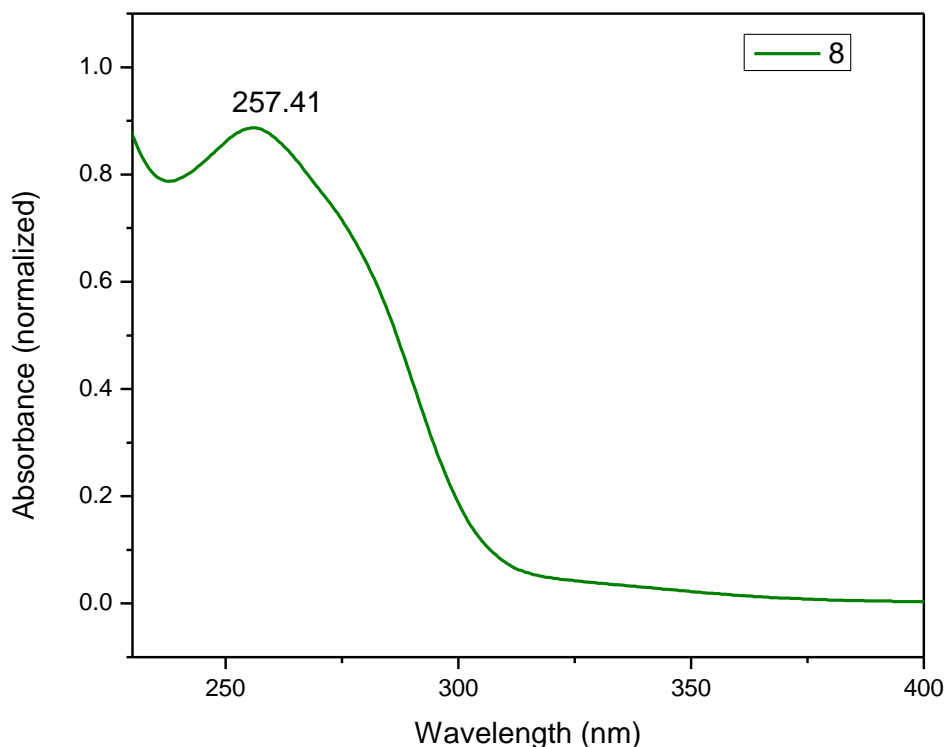

**Figure S45:** UV-VIS spectrum of **8**

**Synthesis of 10:** 6-SIPr (0.200 g, 0.49 mmol) was dissolved in 10 mL toluene in a Schlenk flask and kept at  $-36\text{ }^{\circ}\text{C}$ .  $\text{COO}^t\text{BuCHN}_2$  (0.071 g, 0.50 mmol) was dissolved in 5 mL toluene in a Schlenk tube and transferred slowly to a pre-cooled solution of 6-SIPr. The reaction was run for 20 hours at room temperature. The solution was filtered using a cannula, concentrated to 3-4 mL, and stored at  $4\text{ }^{\circ}\text{C}$  to get plate-shaped yellow crystals of **9** after a day with a yield of 60%.

**$^1\text{H}$  NMR (500 MHz, 298 K,  $\text{CDCl}_3$ ):**  $\delta$  = 1.18 (d,  $J$  = 6.75 Hz, 12 H,  $\text{CH}(\text{CH}_3)_2$ ), 1.25 (singlet, 9 H,  $\text{COOC}(\text{CH}_3)_3$ ), 1.30 (d,  $J$  = 7 Hz, 12 H,  $\text{CH}(\text{CH}_3)_2$ ), 2.27 (quintet,  $J$  = 6 Hz, 2 H,  $\text{NCH}_2\text{CH}_2\text{CH}_2\text{N}$ ), 3.16 (sept,  $J$  = 6.88 Hz, 4 H,  $\text{CH}(\text{CH}_3)_2$ ), 3.58 (t,  $J$  = 5.88 Hz, 4 H,  $\text{NCH}_2\text{CH}_2\text{CH}_2\text{N}$ ), 6.68 (singlet, 1 H,  $\text{NNCHCOO}^t\text{Bu}$ ), 7.10 (d, 4 H,  $J$  = 7.63 Hz, Ar-H), 7.22 (t, 2 H,  $J$  = 7.13 Hz Ar-H) ppm.

**$^{13}\text{C}\{^1\text{H}\}$  NMR (125.7 MHz, 298 K,  $\text{CDCl}_3$ ):**  $\delta$  = 22.90 ( $\text{NCH}_2\text{CH}_2\text{CH}_2\text{N}$ ), 23.55 ( $\text{CH}(\text{CH}_3)_2$ ), 24.65 ( $\text{CH}(\text{CH}_3)_2$ ), 28.35 ( $\text{COOC}(\text{CH}_3)_3$ ), 29.02 ( $\text{CH}(\text{CH}_3)_2$ ), 51.04 ( $\text{NCH}_2\text{CH}_2\text{CH}_2\text{N}$ ), 79.33 ( $\text{COOC}(\text{CH}_3)_3$ ), 123.82 (Ar-C), 127.50 (Ar-C), 138.59 (Ar-C), 141.22 (Ar-C) ppm, 145.12 ( $\text{NNCHCOO}^t\text{Bu}$ ), 154.13 ( $\text{CNNCHCOO}^t\text{Bu}$ ), 165.25 ( $\text{NNCHCOO}^t\text{Bu}$ ).

**HRMS:**  $m/z$  calcd for  $[\text{M}+\text{H}]^+$   $\text{C}_{34}\text{H}_{51}\text{N}_4\text{O}_2$ , 547.80; found **547.40**.

**IR (cm<sup>-1</sup>):** 2960.88, 1674.26, 1439.20, 1315.49, 1160.84, 1268.08, 1063.94, 797.95, 752.59.

**Melting point range:** 220-225 °C.

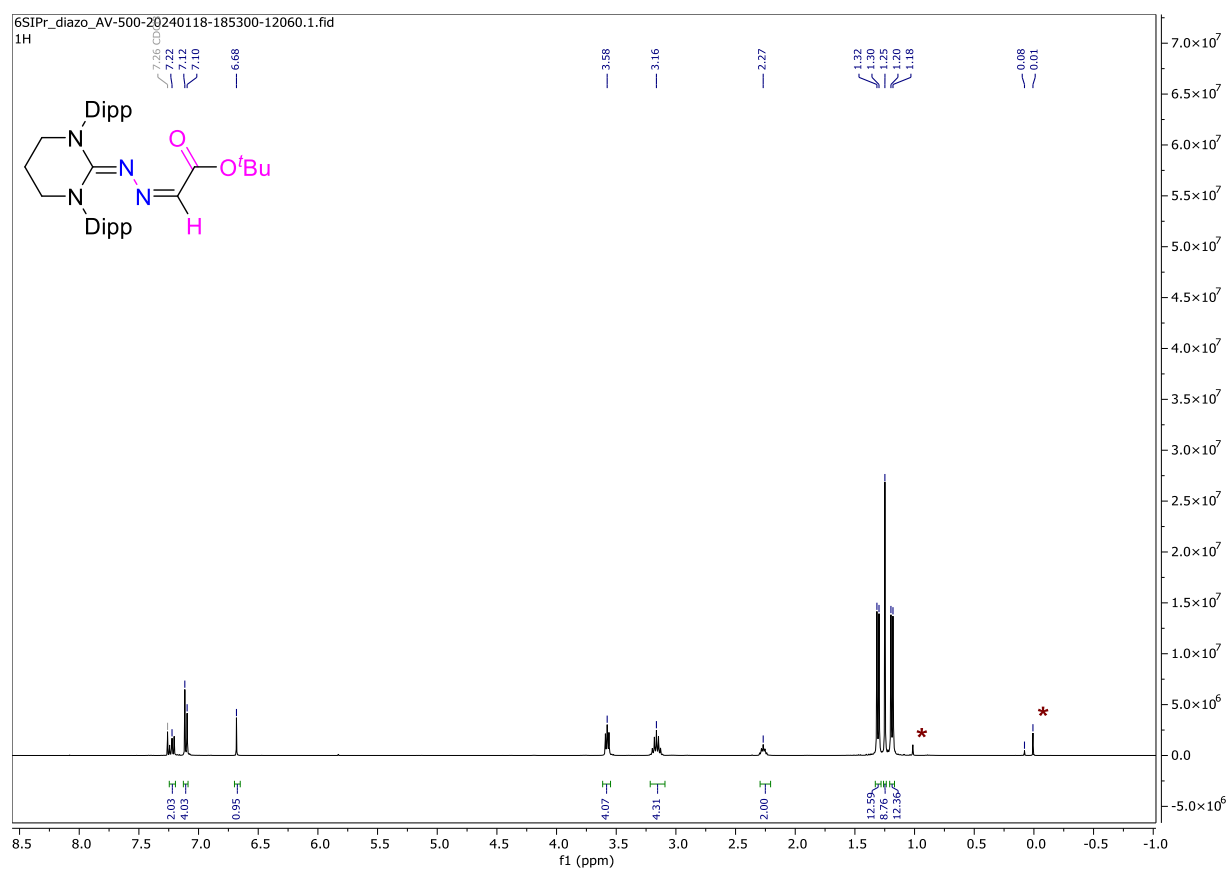

**Figure S46:** <sup>1</sup>H NMR spectrum of **9** (red asterisks belong to minor impurity and 0.08 ppm corresponds to grease)

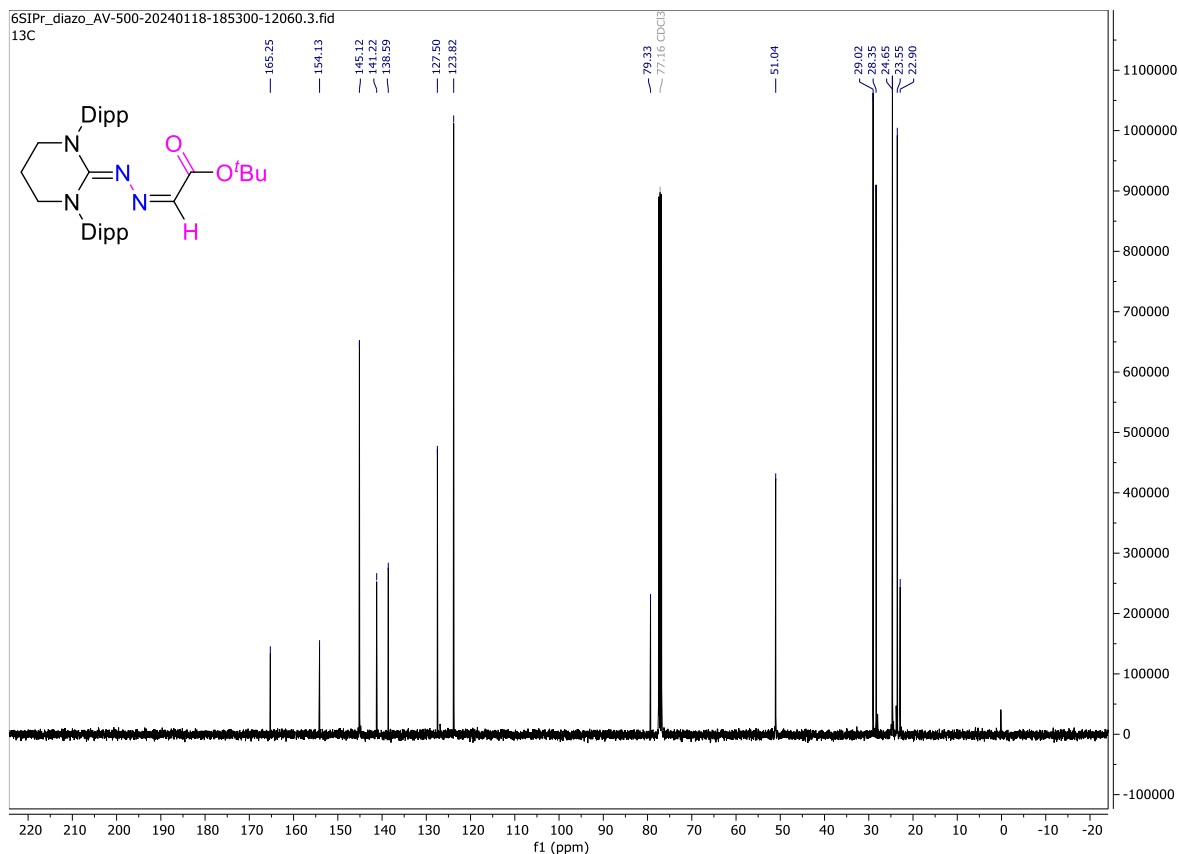

Figure S47: <sup>13</sup>C{<sup>1</sup>H} NMR spectrum of 9

KB-6 #262 RT: 1.17 AV: 1 NL: 1.39E10  
T: FTMS + p ESI Full ms [100.0000-1500.0000]

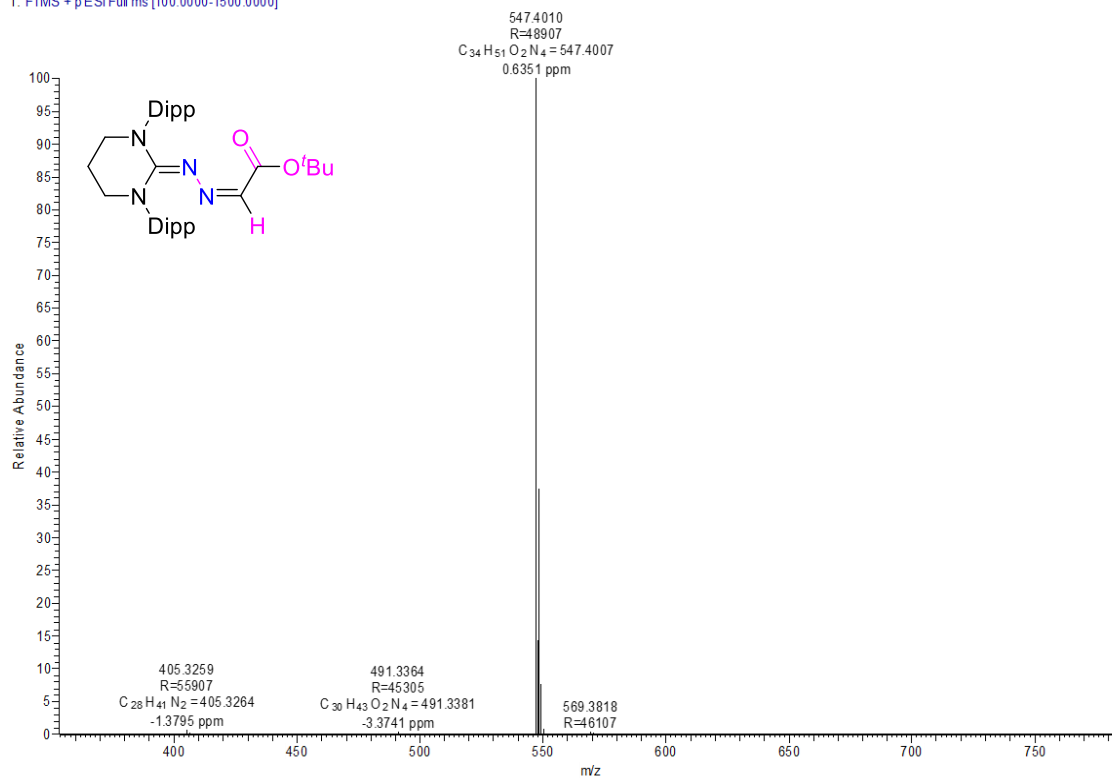

Figure S48: HRMS spectrum of 9

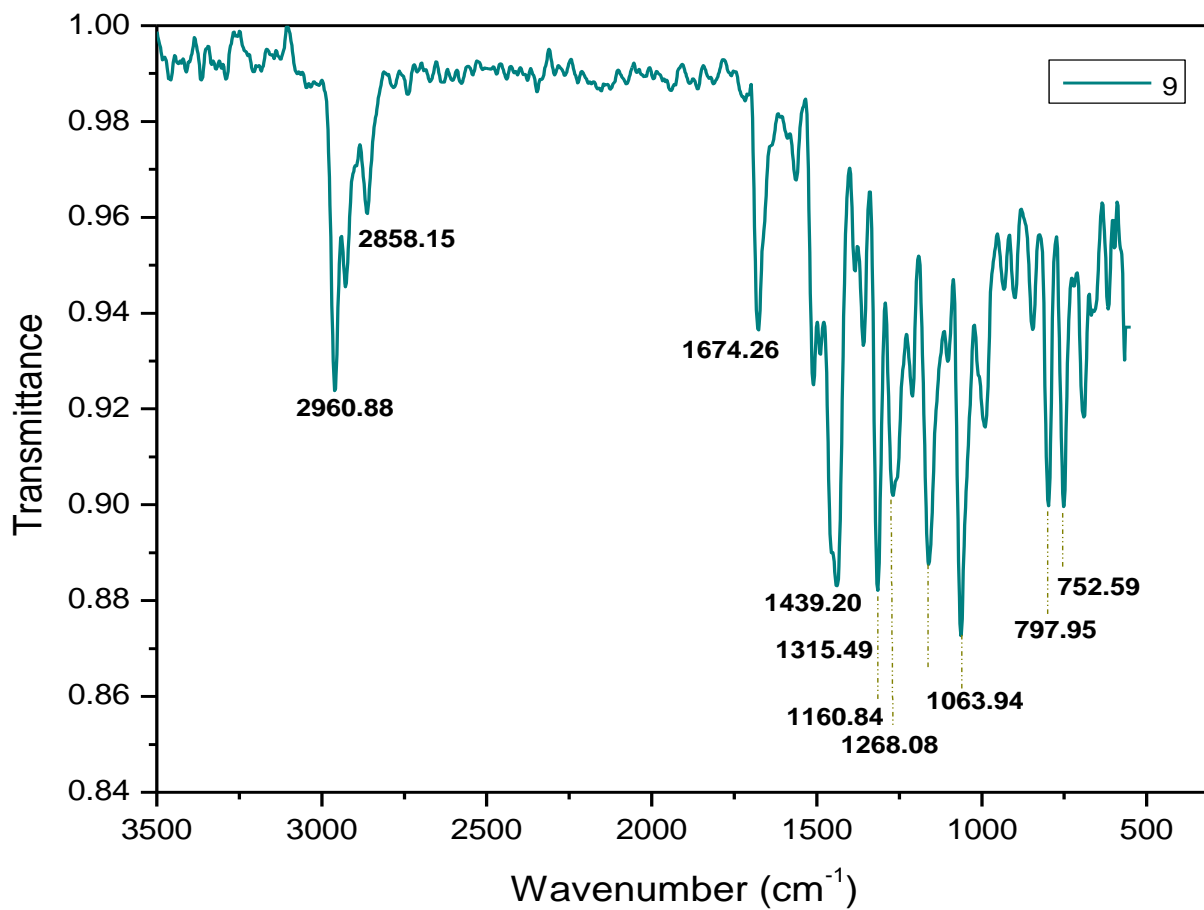

**Figure S49:** IR (ATR) spectrum of **9**

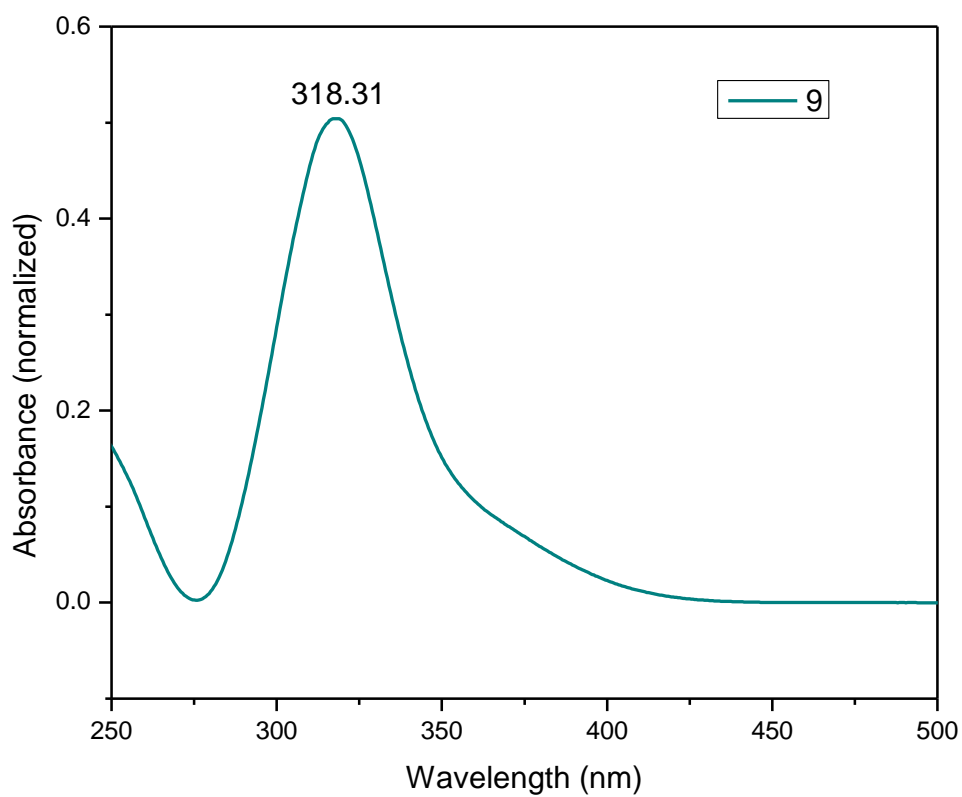

**Figure S50:** UV-VIS spectrum of **9**

**Synthesis of 11:** 5-SIPr (0.200 g, 0.51 mmol) was dissolved in 10 mL toluene in a Schlenk flask and kept at -36 °C. COO<sup>t</sup>BuCHN<sub>2</sub> (0.073 g, 0.51 mmol) was dissolved in 5 mL toluene in a Schlenk tube and transferred slowly to a pre-cooled solution of 5-SIPr. The reaction was run for 18 hours while slowly warming to room temperature. All the volatiles were removed and the residue was dissolved in 6-8 mL of hexane. The solution was filtered using a cannula, concentrated to 3-4 mL, and stored at room temperature to get plate-shaped yellow crystals of **10** after a day with a yield of 62%.

**<sup>1</sup>H NMR (500 MHz, 298 K, C<sub>6</sub>D<sub>6</sub>)**: δ = 1.25 (singlet, *J* = 6.48 Hz, 9 H, COOC(CH<sub>3</sub>)<sub>3</sub>), 1.27 (d, *J* = 6.48 Hz, 12 H, CH(CH<sub>3</sub>)<sub>2</sub>), δ = 1.33 (d, *J* = 6.85 Hz, 12 H, CH(CH<sub>3</sub>)<sub>2</sub>), 3.23 (broad sept, 4 H, CH(CH<sub>3</sub>)<sub>2</sub>), 3.30 (singlet, 4 H, NCH<sub>2</sub>CH<sub>2</sub>N), 7.10 (d, *J* = 7.46 Hz, 2 H, Ar-H), 7.20 (t, *J* = 7.58 Hz, 2 H, Ar-H), 7.40 (singlet, 1 H, NNCHCOO<sup>t</sup>Bu), ppm.

**<sup>13</sup>C{<sup>1</sup>H} NMR (125.7 MHz, 298 K, CDCl<sub>3</sub>)**: δ = 24.20 (CH(CH<sub>3</sub>)<sub>2</sub>), 28.23 (COOC(CH<sub>3</sub>)<sub>3</sub>), 29.06 (CH(CH<sub>3</sub>)<sub>2</sub>), 48.96 (NCH<sub>2</sub>CH<sub>2</sub>N), 51.69 (NCH<sub>2</sub>CH<sub>2</sub>N), 79.75 (COOC(CH<sub>3</sub>)<sub>3</sub>), 123.98 (Ar-C), 128.70 (Ar-C), 141.10 (CNNCHCOO<sup>t</sup>Bu), 145.91 (Ar-C), 147.90 (Ar-C), 158.63 (NNCHCOO<sup>t</sup>Bu), 165.30 (NNCHCOO<sup>t</sup>Bu).

**HRMS**: *m/z* calcd for [M+H]<sup>+</sup> C<sub>33</sub>H<sub>49</sub>O<sub>2</sub>N<sub>4</sub>, 533.77; found **533.38**.

**IR (cm<sup>-1</sup>)**: 2960.88, 1690.75, 1597.97, 1517.55, 1453.63, 1313.43, 1263.94, 1156.72, 804.14, 752.59.

**Melting point range**: 155-160 °C.

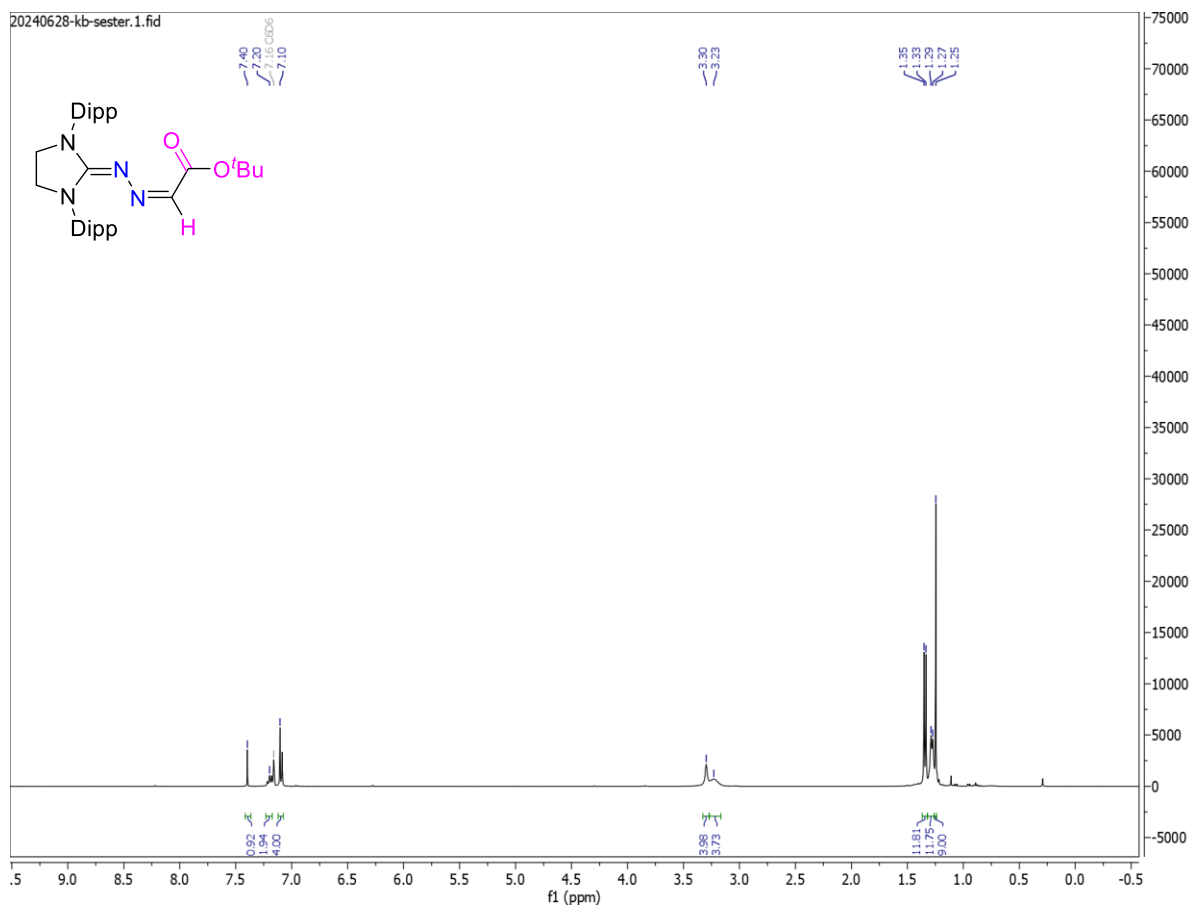

Figure S51: <sup>1</sup>H NMR spectrum of **10**

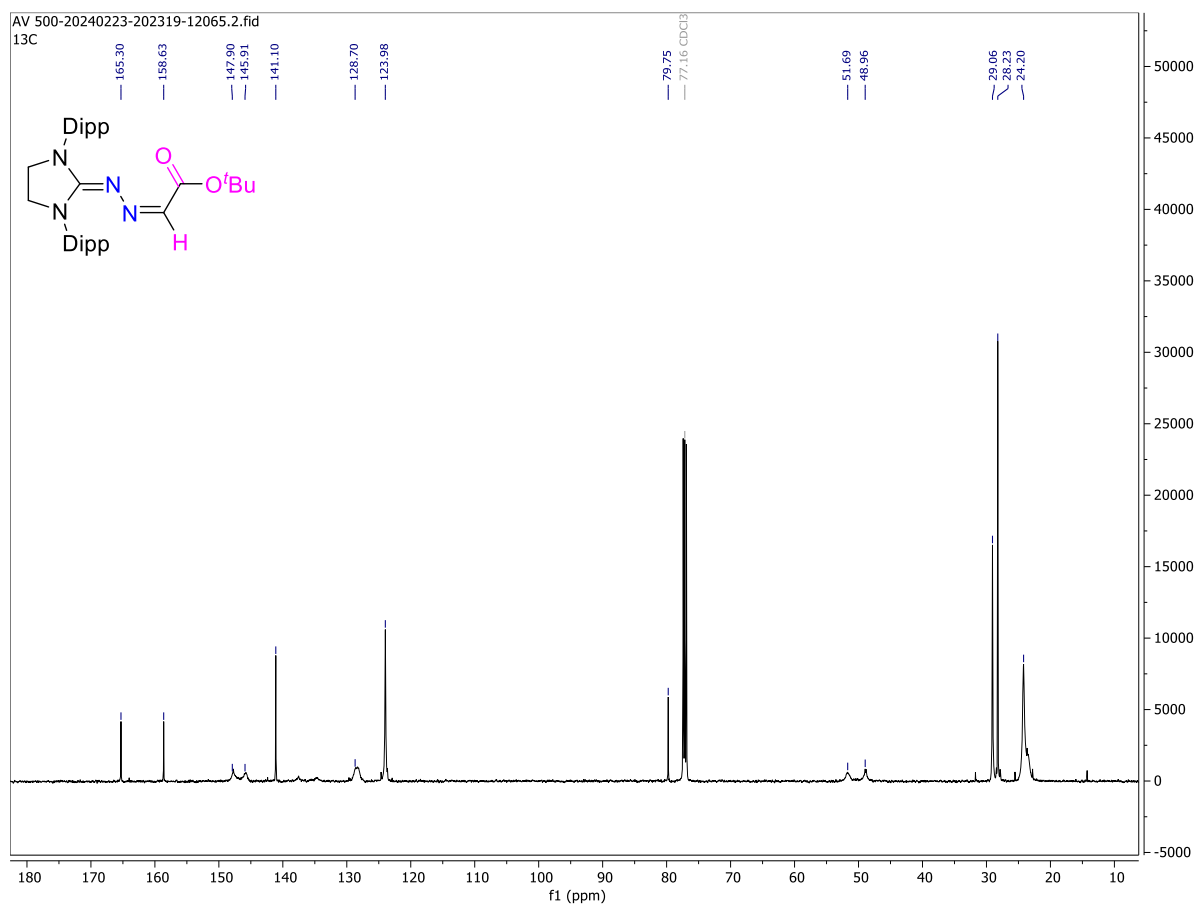

Figure S52: <sup>13</sup>C{<sup>1</sup>H} NMR spectrum of **10**

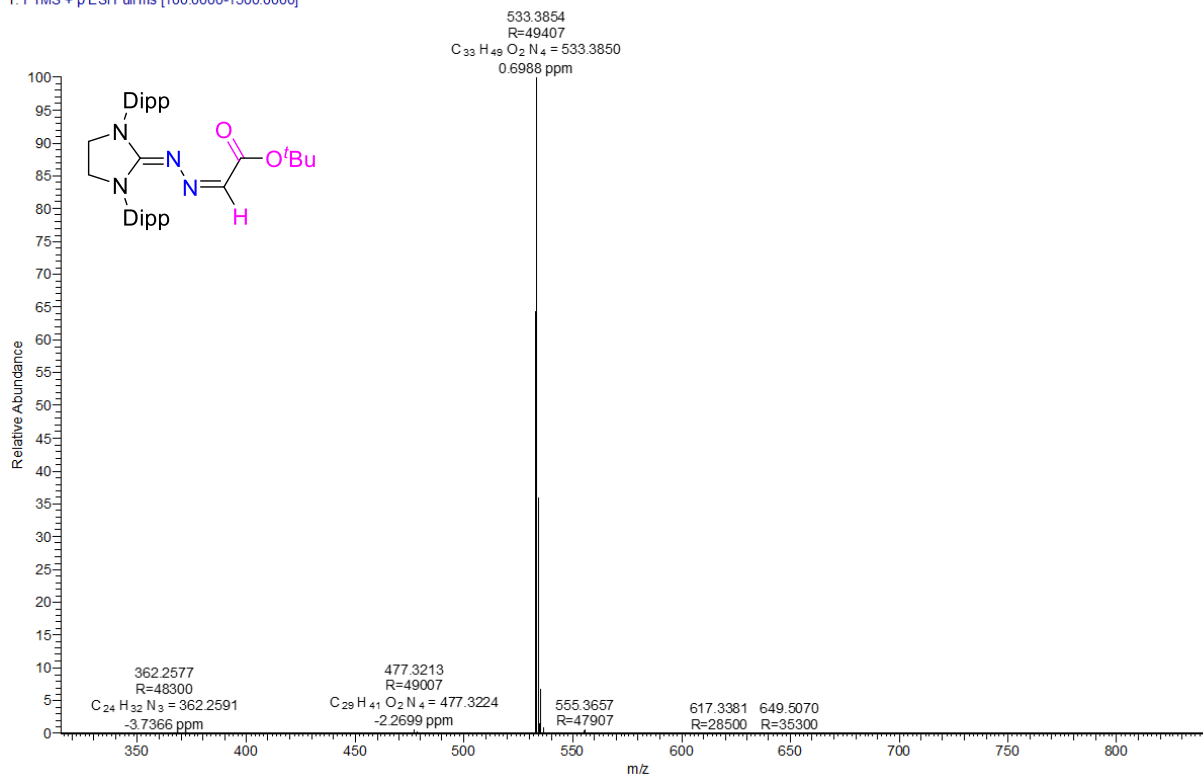

Figure S53: HRMS spectrum of 10

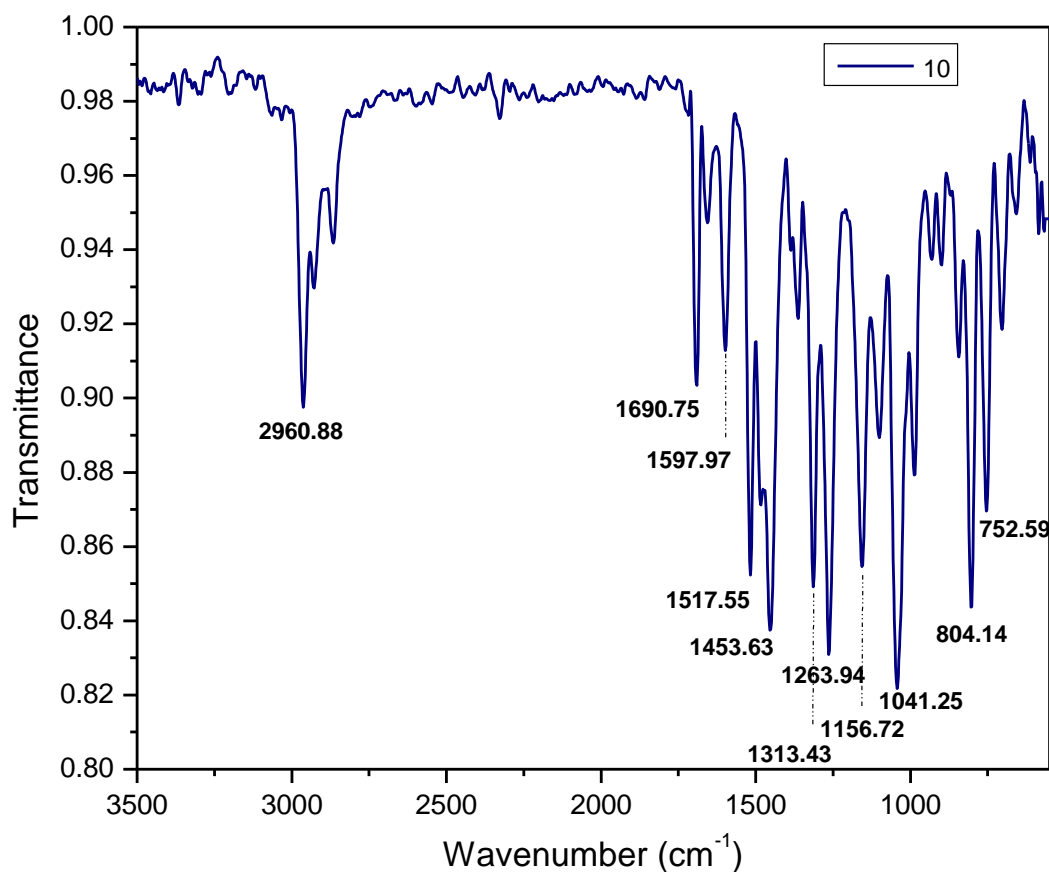

Figure S54: IR (ATR) spectrum of 10

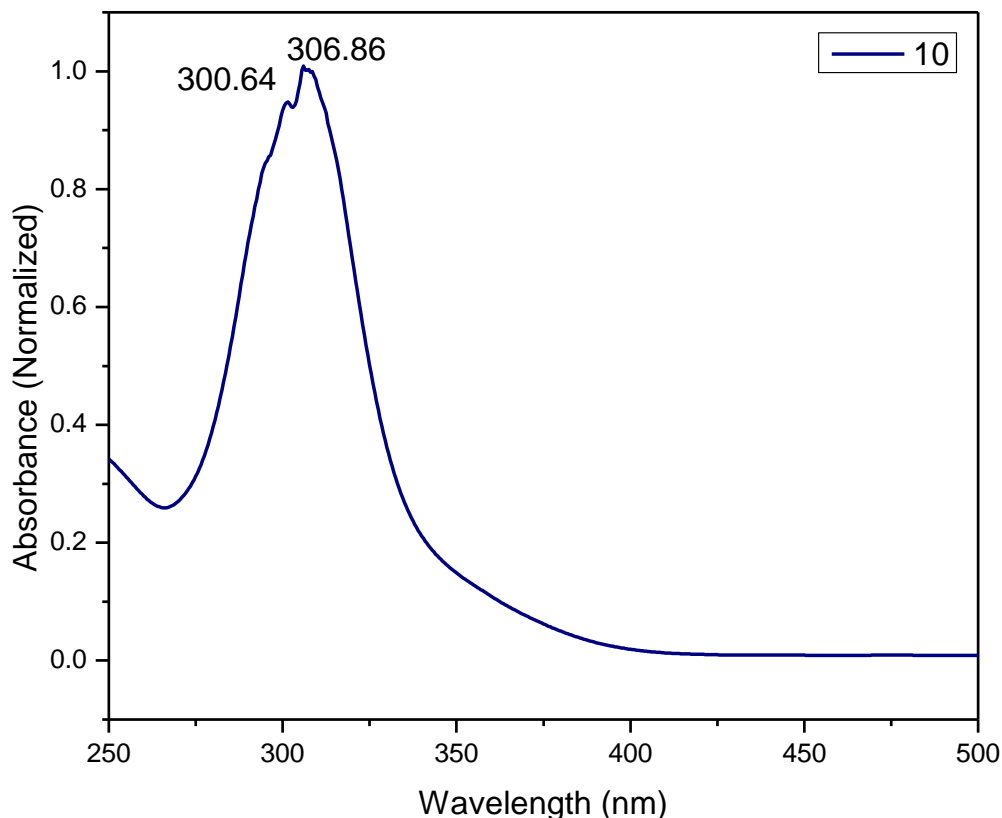

**Figure S55:** UV-VIS spectrum of **10**

**Synthesis of 11:** 5-IPr (0.200 g, 0.51 mmol) was dissolved in 10 mL toluene in a Schlenk flask and kept at  $-36\text{ }^{\circ}\text{C}$ .  $\text{COO}^t\text{BuCHN}_2$  (0.074 g, 0.52 mmol) was dissolved in 5 mL toluene in a Schlenk tube and transferred slowly to a pre-cooled solution of 5-IPr. The reaction was run for 20 hours while slowly warming to room temperature. The solution was filtered using a cannula, concentrated to 3-4 mL, and stored at  $-36\text{ }^{\circ}\text{C}$  to get block-shaped yellow crystals of **11** after 2 days with a yield of 70%.

**$^1\text{H}$  NMR (400 MHz, 298 K,  $\text{C}_6\text{D}_6$ ):**  $\delta$  = 1.18 (d,  $J$  = 6.85 Hz, 12 H,  $\text{CH}(\text{CH}_3)_2$ ), 1.27 (singlet, 9 H,  $\text{COOC}(\text{CH}_3)_3$ ), 1.31 (d,  $J$  = 6.88 Hz, 12 H,  $\text{CH}(\text{CH}_3)_2$ ), 3.01 (sept,  $J$  = 6.85 Hz, 4 H,  $\text{CH}(\text{CH}_3)_2$ ), 5.82 (singlet, 2 H,  $\text{NCHCHN}$ ), 7.09 (d, 4 H,  $J$  = 7.70 Hz, Ar-H), 7.22 (t,  $J$  = 7.46 Hz, 2 H, Ar-H), 7.47 (singlet, 1 H,  $\text{NNCHCOO}^t\text{Bu}$ ) ppm.

**$^{13}\text{C}\{^1\text{H}\}$  NMR (101 MHz, 298 K,  $\text{C}_6\text{D}_6$ ):**  $\delta$  = 23.50 ( $\text{CH}(\text{CH}_3)_2$ ), 23.88 ( $\text{CH}(\text{CH}_3)_2$ ), 28.39 ( $\text{COOC}(\text{CH}_3)_3$ ), 29.28 ( $\text{CH}(\text{CH}_3)_2$ ), 78.58 ( $\text{COOC}(\text{CH}_3)_3$ ), 116.69 (Ar-C), 123.96 (Ar-C), 125.70 (Ar-C), 128.57 (Ar-C), 129.62 ( $\text{NCHCHN}$ ), 137.89, 138.12 (Ar-C), 146.26 ( $\text{NNCHCOO}^t\text{Bu}$ ), 152.52 ( $\text{CNNCHCOO}^t\text{Bu}$ ), 164.73 ( $\text{NNCHCOO}^t\text{Bu}$ ) ppm.

**HRMS:**  $m/z$  calcd for  $[\text{M}+\text{H}]^+$   $\text{C}_{33}\text{H}_{47}\text{N}_4\text{O}_2$ , 531.36; found **531.36**.



**IR (cm<sup>-1</sup>):** 2962.95, 1678.38, 1579.41, 1463.94, 1327.86, 1278.37, 1072.18, 987.65, 936.10, 756.71.

**Melting point range:** 99-103 °C.

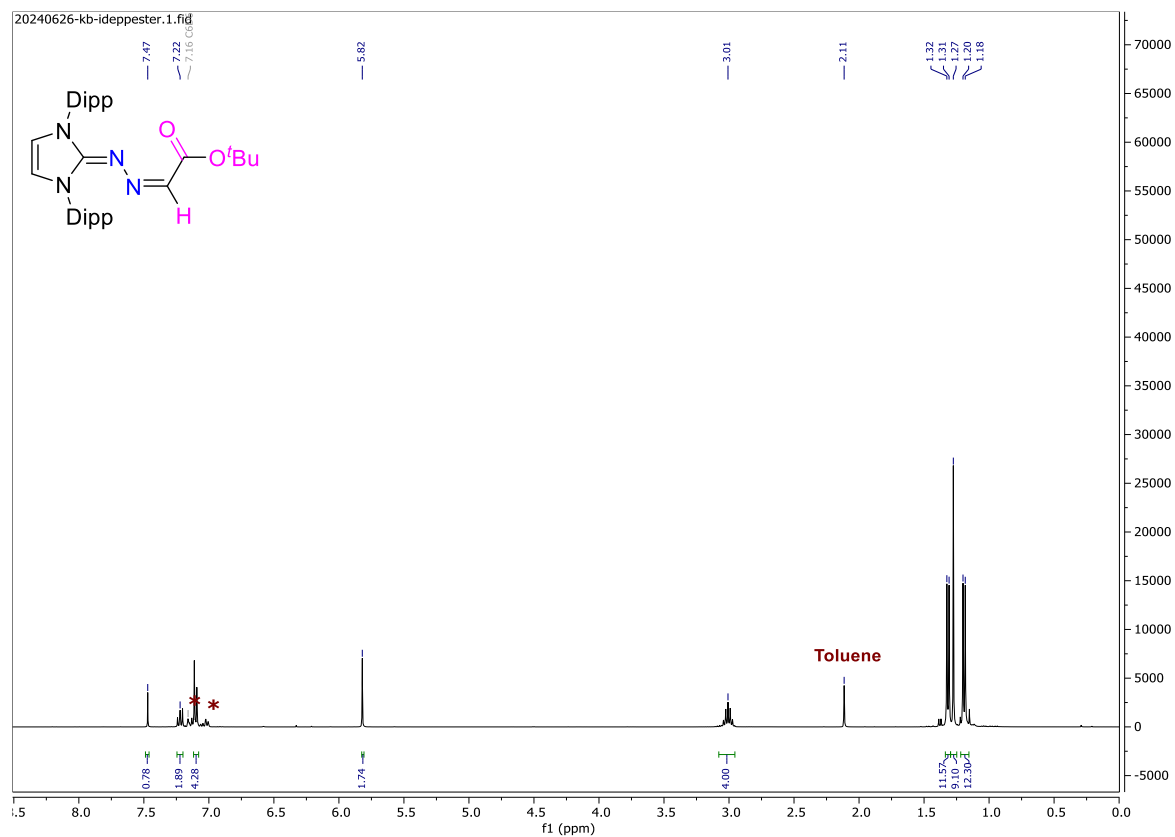

**Figure S56:** <sup>1</sup>H NMR spectrum of **11** (red asterisks belong to toluene)

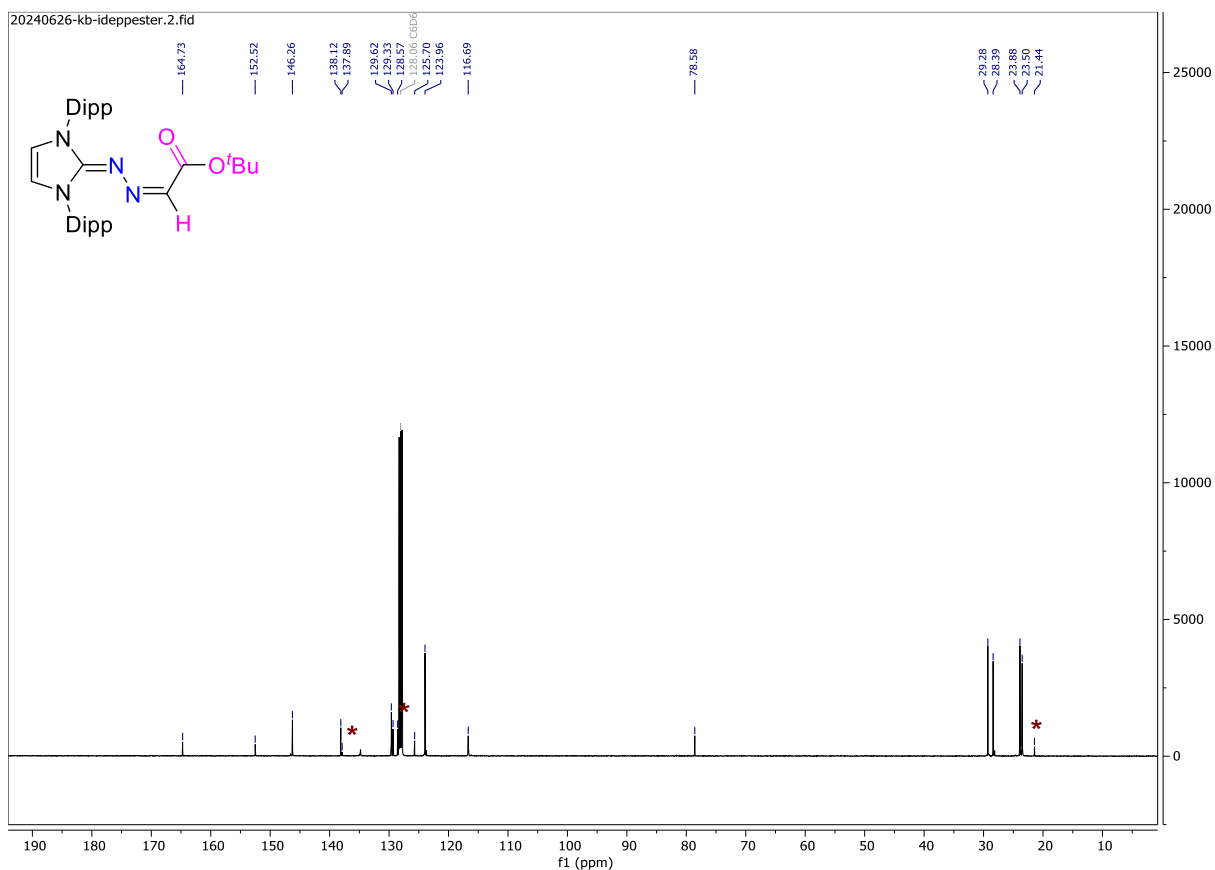

**Figure S57:**  $^{13}\text{C}\{^1\text{H}\}$  NMR spectrum of **11** (red asterisks belong to toluene)

KB-5 #358 RT: 1.59 AV: 1 NL: 2.87E7  
T: FTMS + p ESI Full ms [100.0000-1500.0000]

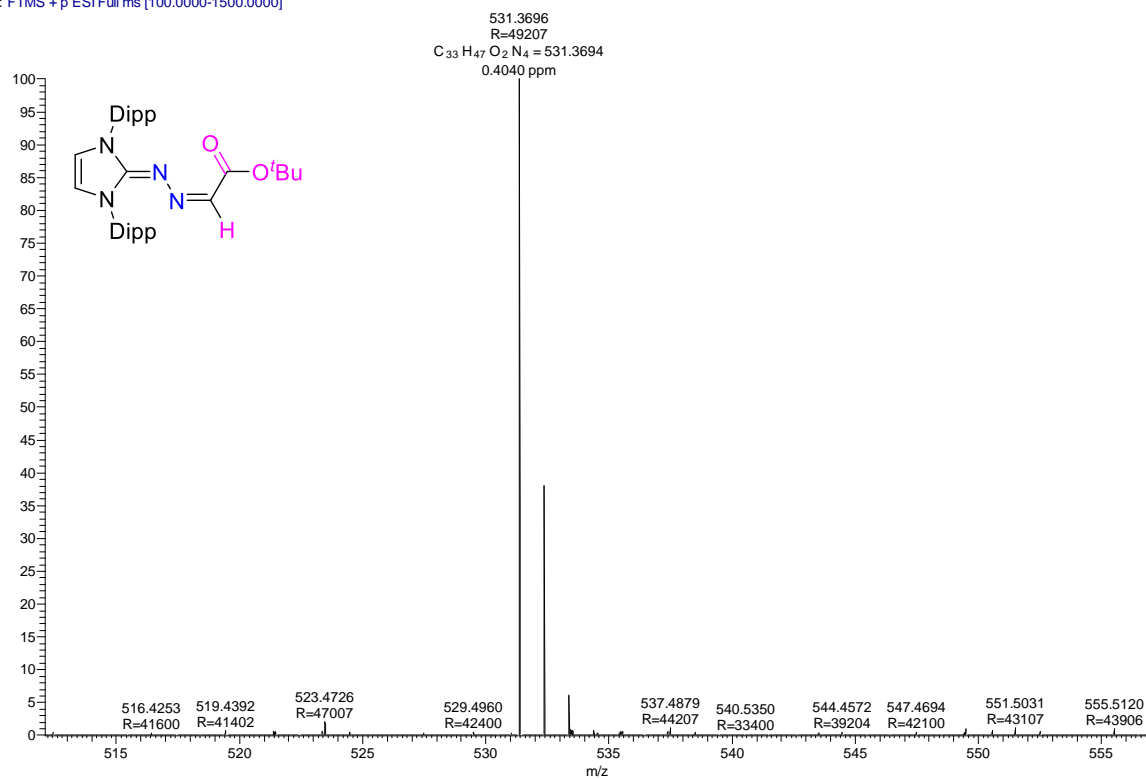

**Figure S58:** HRMS spectrum of **11**

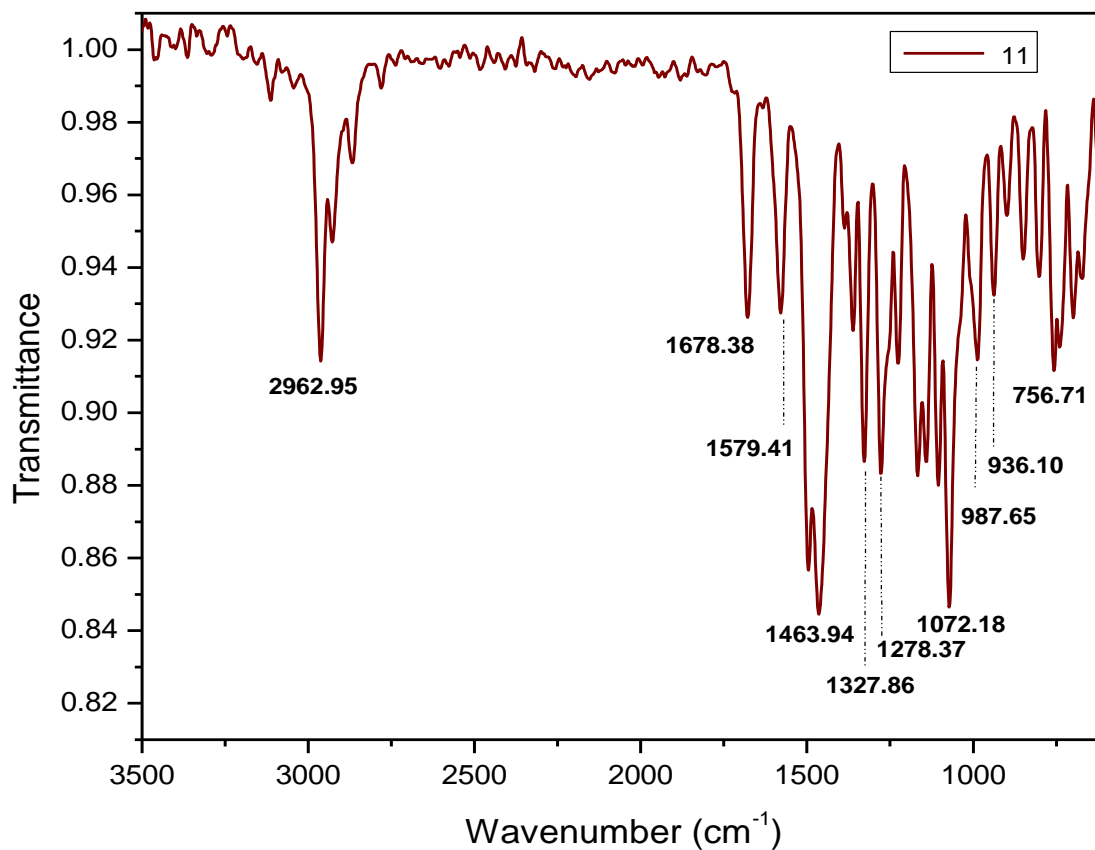

**Figure S59:** IR (ATR) spectrum of **11**

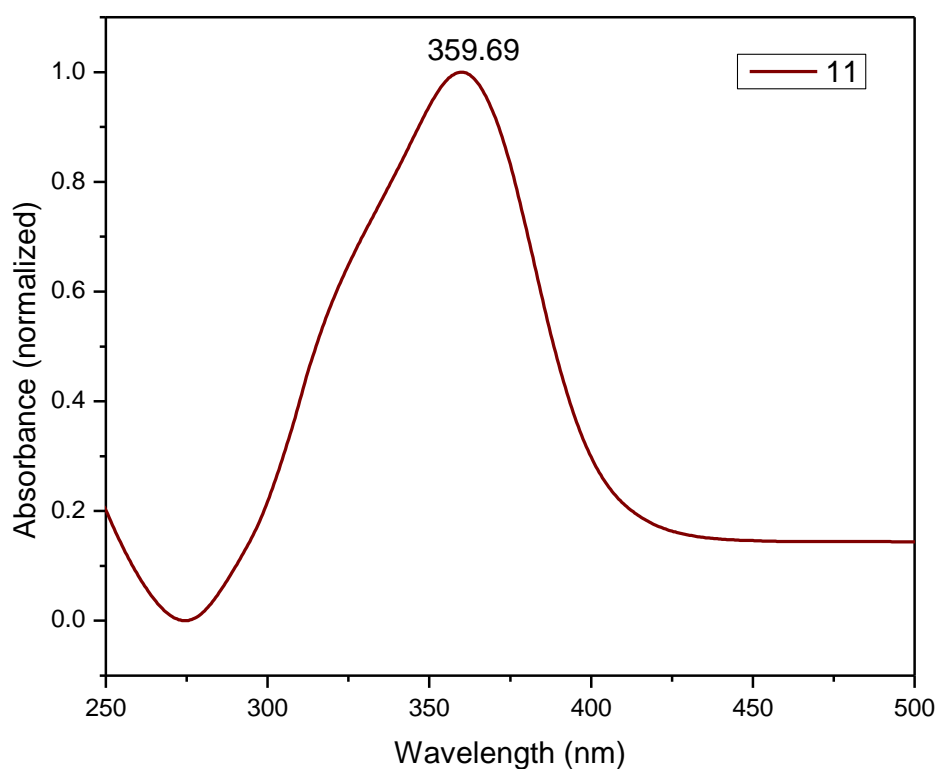

**Figure S60:** UV-VIS spectrum of **11**

**Synthesis of 12:** DAC.OTf salt (0.300 g, 0.50 mmol) and NaHMDS (0.094 g, 0.51 mmol) were taken together and 20 mL toluene was added to it. The reaction was

run for 30 min. Filtered the solution using frit and kept the Schlenk flask at  $-36\text{ }^{\circ}\text{C}$ .  $\text{COO}^t\text{BuCHN}_2$  (0.094 g, 0.66 mmol) was dissolved in 5 mL toluene and transferred to the Schlenk flask resulting in a yellow-colored solution. The reaction was run for 18 hours while slowly warming to room temperature. All the volatiles were removed and the pure product was isolated using column chromatography in 5% ethylacetate and pet ether with a yield of 35%. The suitable crystals for XRD were grown from the crude mixture by slow evaporation at room temperature in the DCM and hexane mixture in air.

**$^1\text{H}$  NMR (400 MHz, 298 K,  $\text{CDCl}_3$ ):**  $\delta$  = 1.18 (dd,  $J$  = 6.50 Hz, 9 H,  $\text{CH}(\text{CH}_3)_2$ ), 1.22 (d,  $J$  = 6.88 Hz, 14 H,  $\text{CH}(\text{CH}_3)_2$ ), 1.33 (singlet, 9 H,  $\text{COOC}(\text{CH}_3)_3$ ), 1.76 (singlet, 6 H,  $(\text{OCC}(\text{CH}_3)_2)$ ), 2.89 (sept,  $J$  = 6.13 Hz, 4 H,  $\text{CH}(\text{CH}_3)_2$ ), 6.56 (singlet, 1 H,  $\text{NNCHCOO}^t\text{Bu}$ ), 7.13 (d,  $J$  = 7.50 Hz, 2 H, Ar-H), 7.22 (d,  $J$  = 7.38 Hz, 2 H, Ar-H), 7.34 (t,  $J$  = 7.63 Hz, 1 H, Ar-H), 7.40 (t,  $J$  = 7.38 Hz, 1 H, Ar-H) ppm.

**$^{13}\text{C}\{^1\text{H}\}$  NMR (101 MHz, 298 K,  $\text{CDCl}_3$ ):**  $\delta$  = 22.15-24.37 ( $\text{CH}(\text{CH}_3)_3$ ), 25.33 ( $\text{CH}(\text{CH}_3)_3$ ), 27.87 ( $\text{COOCC}(\text{CH}_3)_2$ ), 29.36 ( $\text{COOC}(\text{CH}_3)_3$ ), 47.20 ( $\text{COOC}(\text{CH}_3)_2$ ), 81.42 ( $\text{OCC}(\text{CH}_3)_2$ ), 123.49-132.31 (Ar-C), 137.47 ( $\text{NCNNCOO}^t\text{Bu}$ ), 145.03 (Ar-C), 145.34 ( $\text{CHCOO}^t\text{Bu}$ ), 145.71 (Ar-C), 161.93 ( $\text{COOC}(\text{CH}_3)_3$ ), 171.01, 171.93 ( $\text{OCC}(\text{CH}_3)_2$ ) ppm.

**HRMS:**  $m/z$  calcd for  $[\text{M}+\text{H}]^+$   $\text{C}_{36}\text{H}_{51}\text{N}_4\text{O}_4$ , 603.38; found **603.39**.

**IR ( $\text{cm}^{-1}$ ):** 2962.91, 1692.79, 1608.20, 1577.33, 1453.61, 1383.51, 1335.14, 1255.83, 1158.77, 983.51.

**Melting point range:** 155-158  $^{\circ}\text{C}$ .

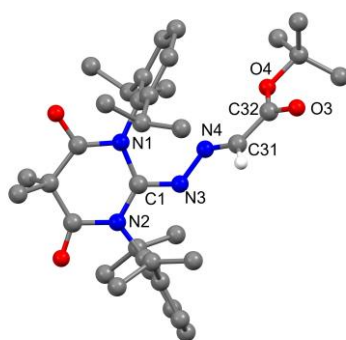

**Figure S61:** The solid-state structure of **12**

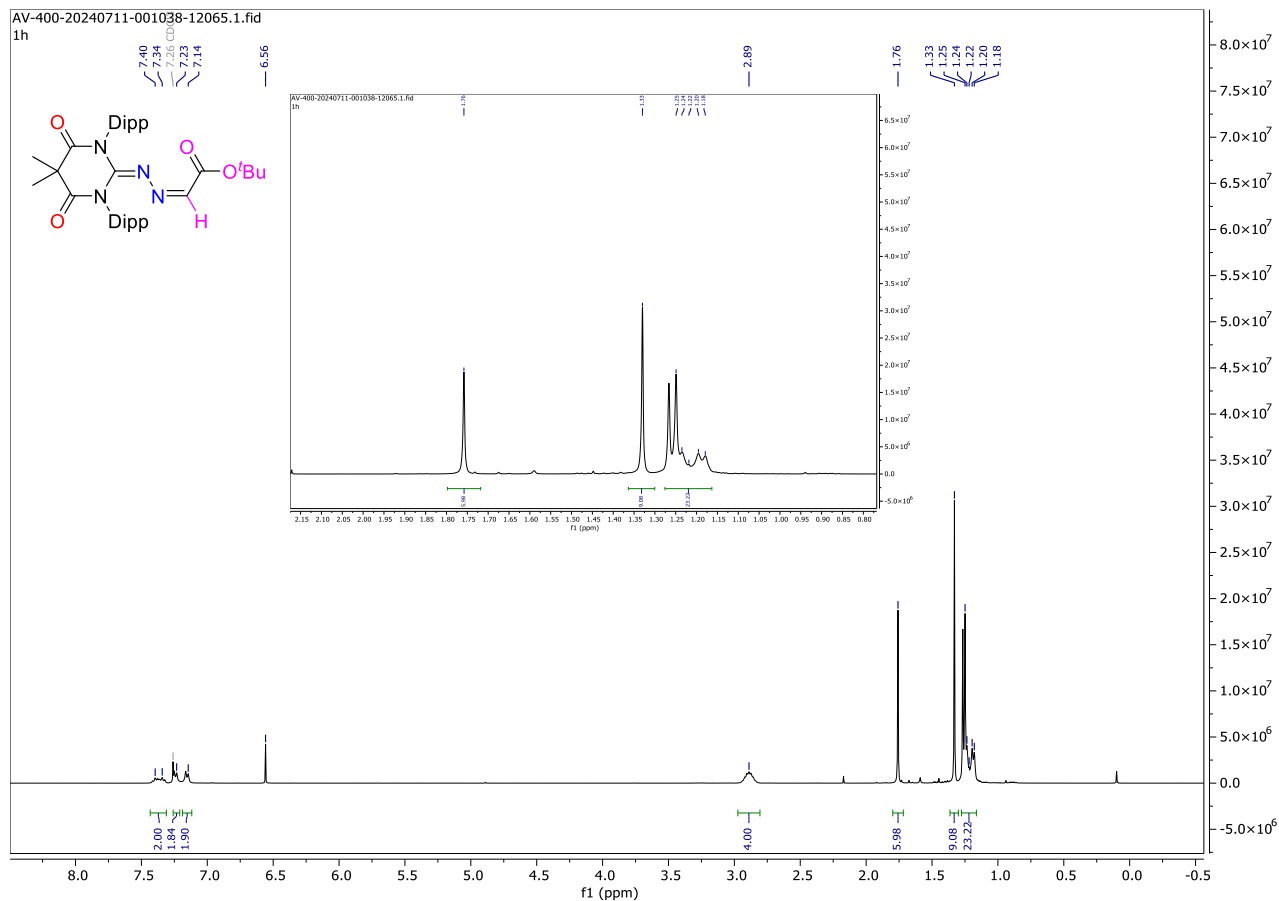

**Figure S62:**  $^1\text{H}$  NMR spectrum of **12** (very small extra peaks in the region 0-2 ppm belong to minor impurities)

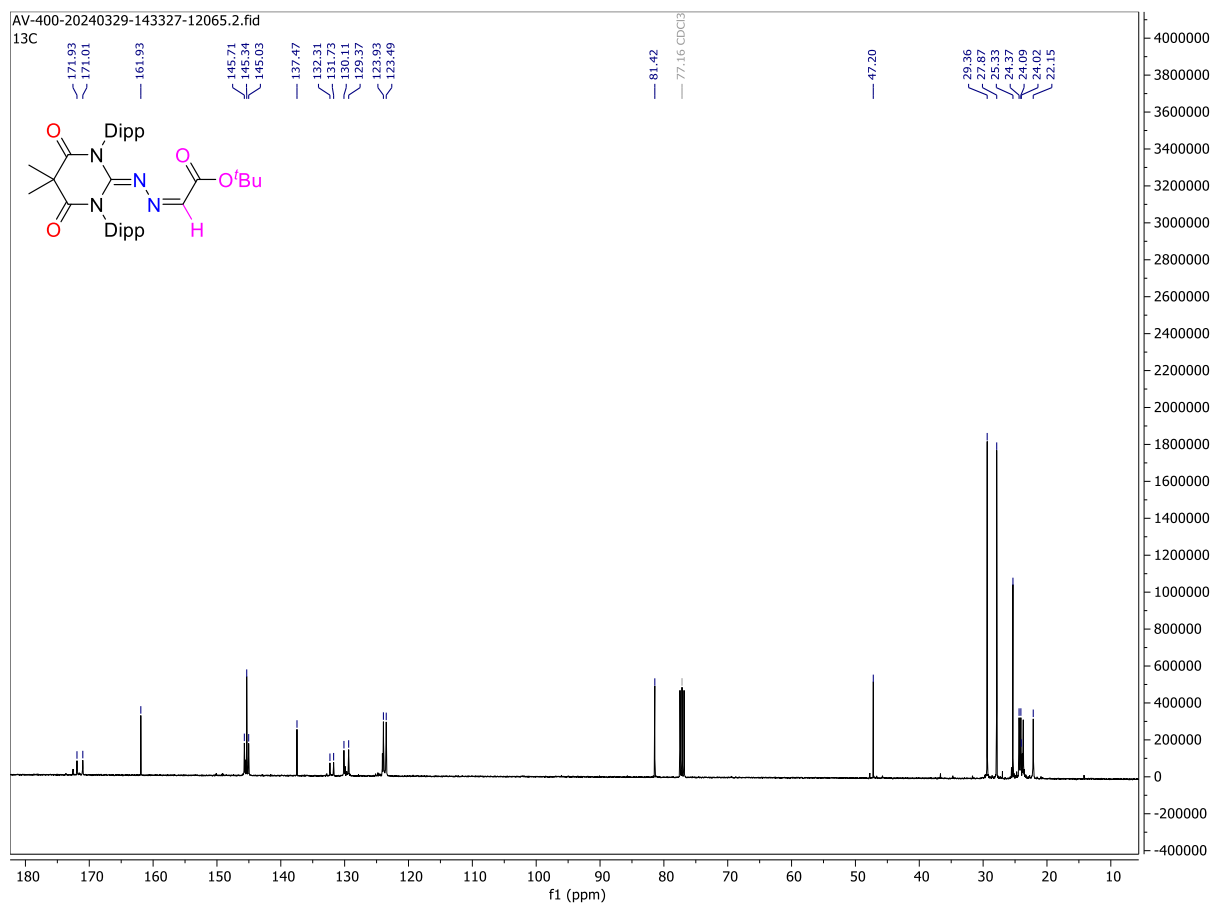

**Figure S63:**  $^{13}\text{C}\{^1\text{H}\}$  NMR spectrum of **12**

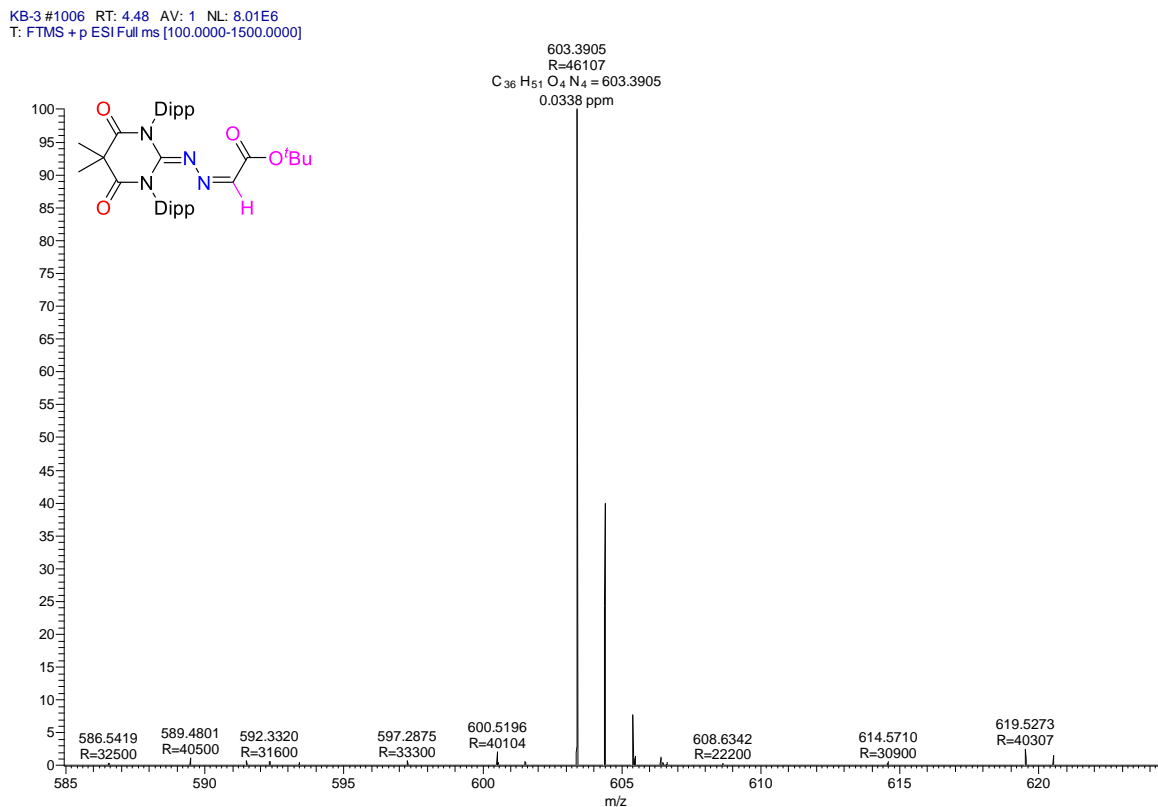

**Figure S64:** HRMS spectrum of **12**

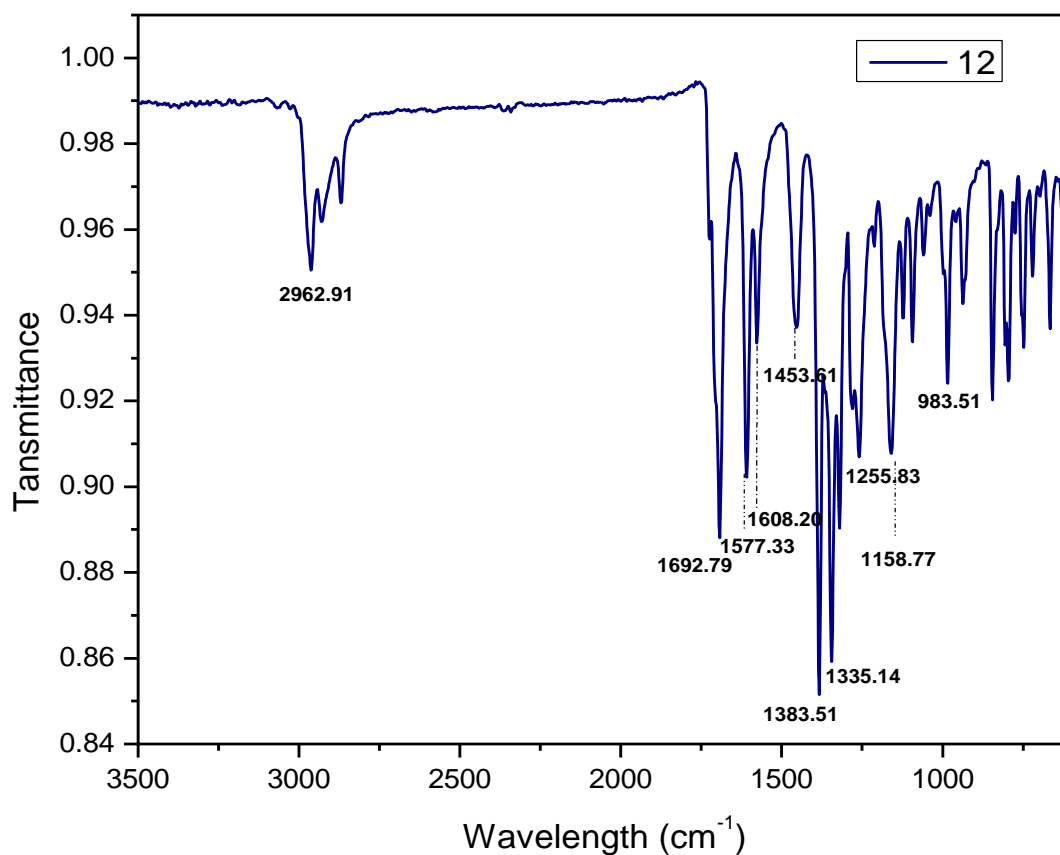

**Figure S65:** IR (ATR) spectrum of **12**

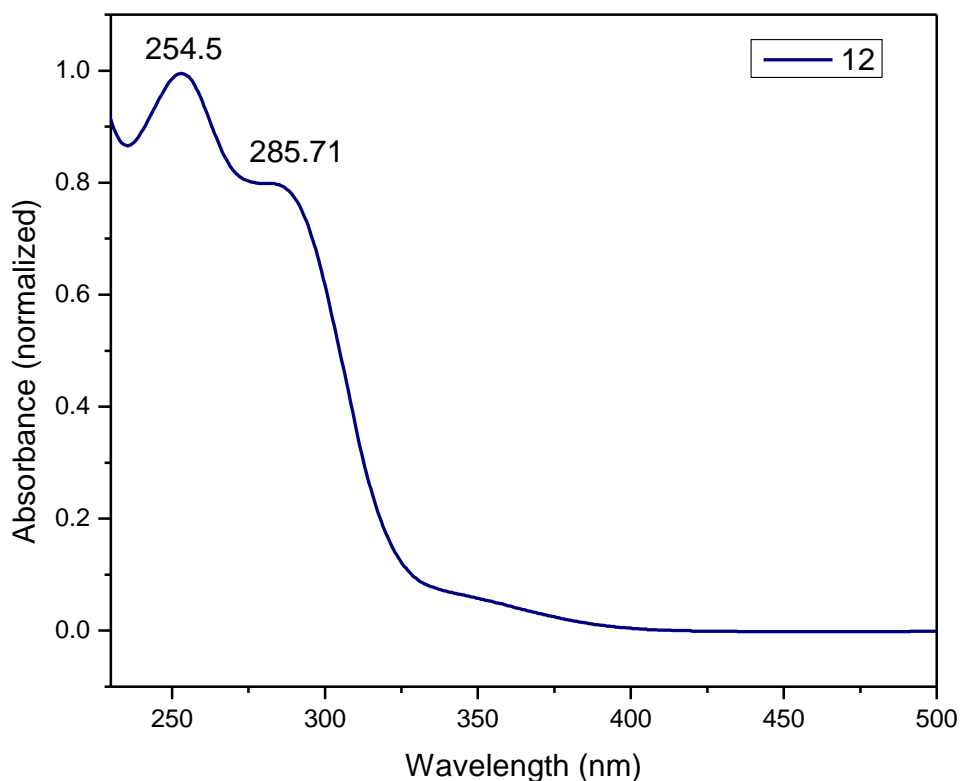

**Figure S66:** UV-VIS spectrum of **12**

**Synthesis of 13 and 14:** 5-I'Bu (0.300 g, 1.66 mmol) was dissolved in 10 mL toluene in a Schlenk flask and kept at  $-36\text{ }^{\circ}\text{C}$  for 10 min. After that, COO'BuCHN<sub>2</sub> (0.241 g, 1.7 mmol) solution in toluene was added to the solution of 5-I'Bu resulting in an orange-colored solution with the immediate formation of a yellow-colored precipitate. The reaction was run for 6 hours while slowly warming to room temperature. The solution was filtered using a cannula and all the volatiles were removed to yield a yellow-colored sticky liquid product, **14** with a yield of 35%. Suitable crystals were obtained upon supersaturation by dissolving the product in DCM and hexane mixture after leaving the vial exposed to air for a month to afford yellow-colored crystals of **14**.

The precipitate part was completely dried, and 8 mL toluene was added to it and stirred for 15 minutes. Decanted the toluene part and dried the precipitate to get pure product **13** with a yield of 32%. Dissolved **13** in 20 mL THF and filtered using a cannula, concentrated to 3 mL, and kept at  $-36\text{ }^{\circ}\text{C}$  for crystallization to afford block-shaped yellow crystals after a day.

**$^1\text{H}$  NMR (500 MHz, 298 K, THF- $d_8$ ) of 13:**  $\delta$  = 1.51, 1.54 (singlet, 18 H, COO<sup>t</sup>Bu), 1.62 (singlet, 18 H, C(CH<sub>3</sub>)<sub>3</sub>), 1.63 (singlet, 1 H, NNCH(COO<sup>t</sup>Bu)NN), 7.91 (singlet, 2 H, NCHCHN), 10.09 (singlet, 1 H, imidazolium H) ppm.

**$^{13}\text{C}\{^1\text{H}\}$  NMR DEPT (101 MHz, 298 K, THF- $d_8$ ):** 27.60, 28.08 (COO(CH<sub>3</sub>)<sub>3</sub>), 29.02 (C(CH<sub>3</sub>)<sub>3</sub>), 90.44 (imidazolium C), 120.12 (NCHCHN), 135.04 (NNCH(COO<sup>t</sup>Bu)NN) ppm.

**$^{13}\text{C}\{^1\text{H}\}$  NMR (101 MHz, 298 K, CDCl<sub>3</sub>):**  $\delta$  = 28.27, 28.63 (COO(CH<sub>3</sub>)<sub>3</sub>), 29.98 (C(CH<sub>3</sub>)<sub>3</sub>), 60.38 (C(CH<sub>3</sub>)<sub>3</sub>), 79.05, 80.61 (COO(CH<sub>3</sub>)<sub>3</sub>), 89.84 (NNC(COO<sup>t</sup>Bu)NN), 119.91 (NCHCHN), 151.69 (NNCH(COO<sup>t</sup>Bu)NN), 165.30, 171.66 (COO(CH<sub>3</sub>)<sub>3</sub>) ppm.

**HRMS:** m/z calcd for 13: C<sub>22</sub>H<sub>40</sub>N<sub>6</sub>O<sub>4</sub>, 452.31; found **180.31** for imidazolium part.

**IR (cm<sup>-1</sup>):** 2975.28, 1735.24, 1682.48, 1364.95, 1204.13, 1129.90, 1032.99, 928.21, 919.59, 715.2.

**Melting point range:** 96-100 °C.

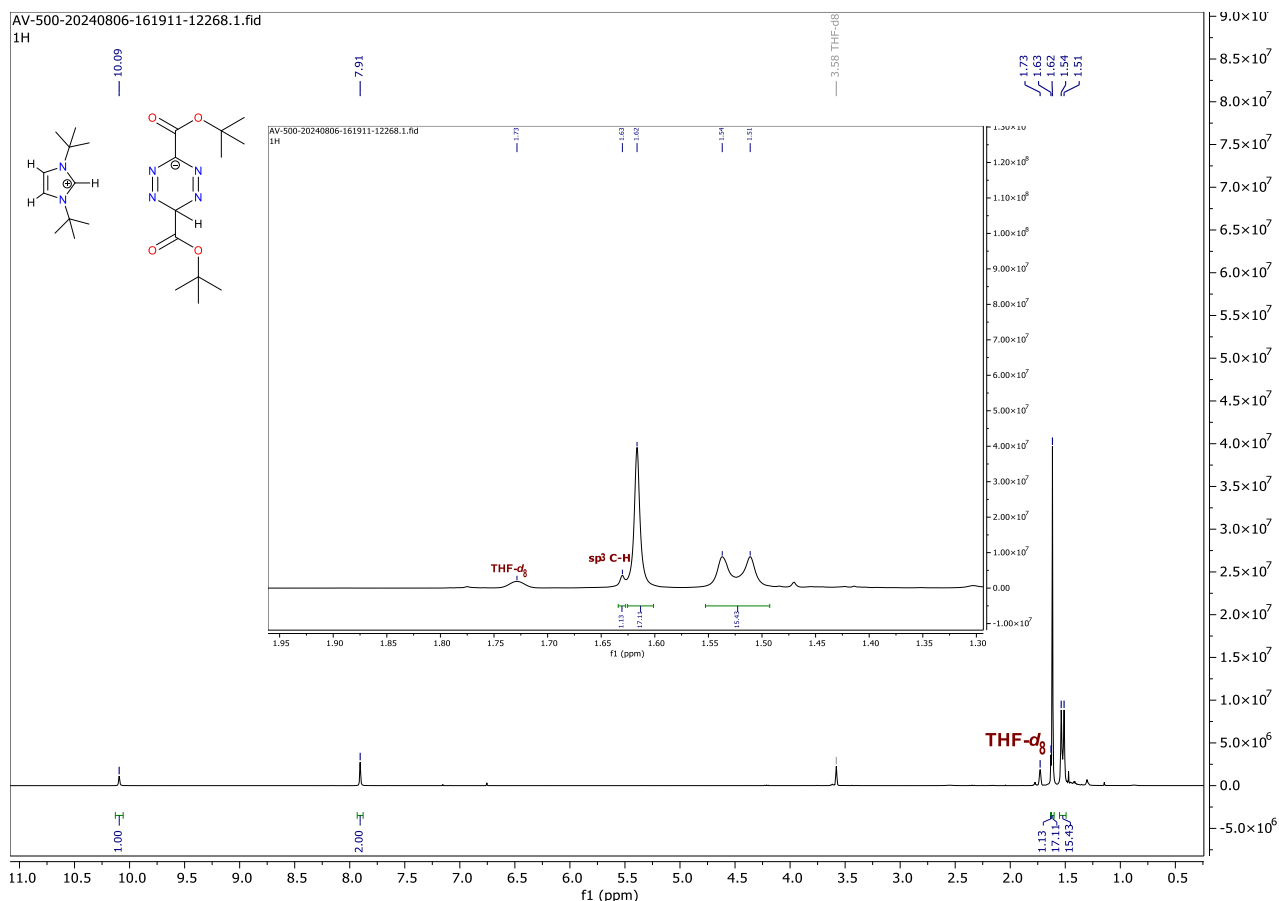

**Figure S67:**  $^1\text{H}$  NMR spectrum of 13 in THF- $d_8$



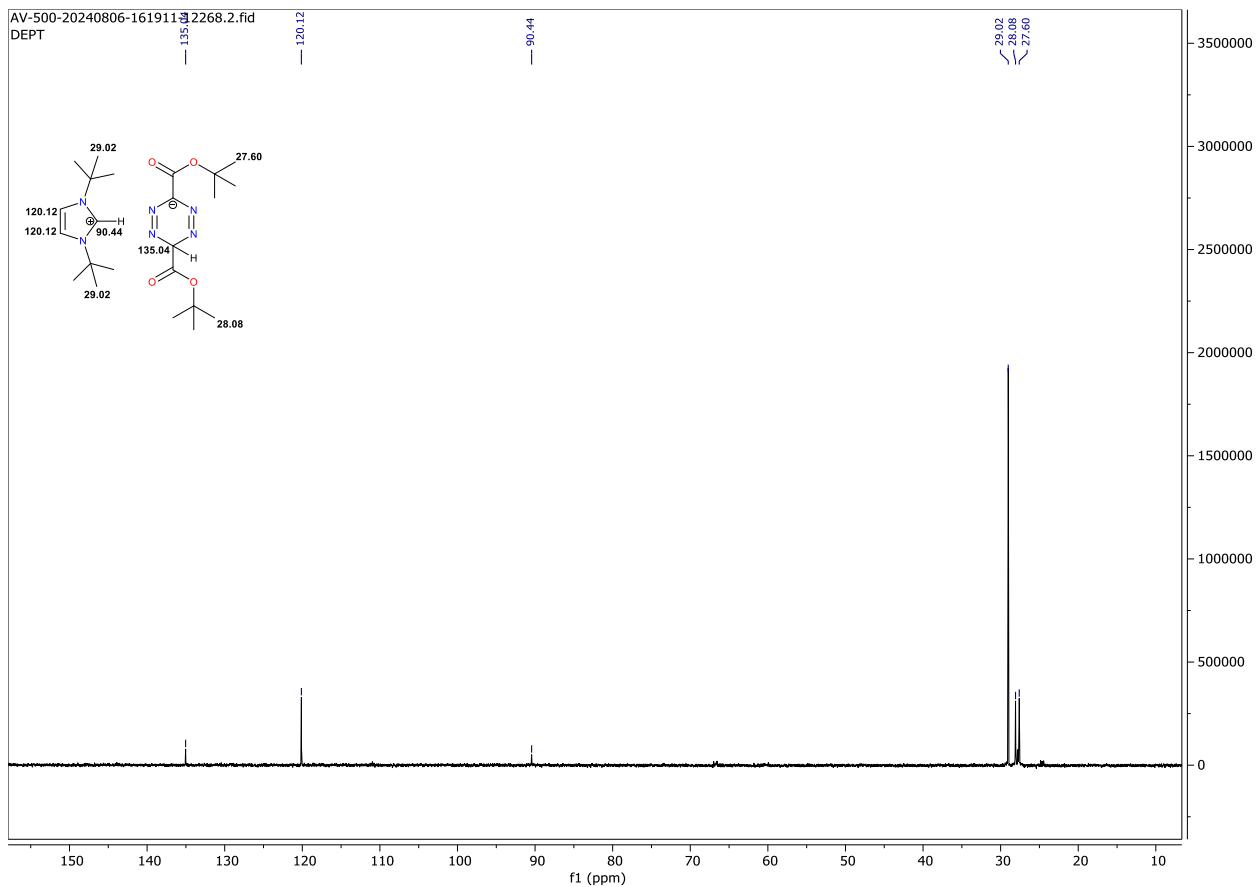

**Figure S68:**  $^{13}\text{C}\{^1\text{H}\}$  DEPT NMR spectrum of **13** in  $\text{THF-}d_8$

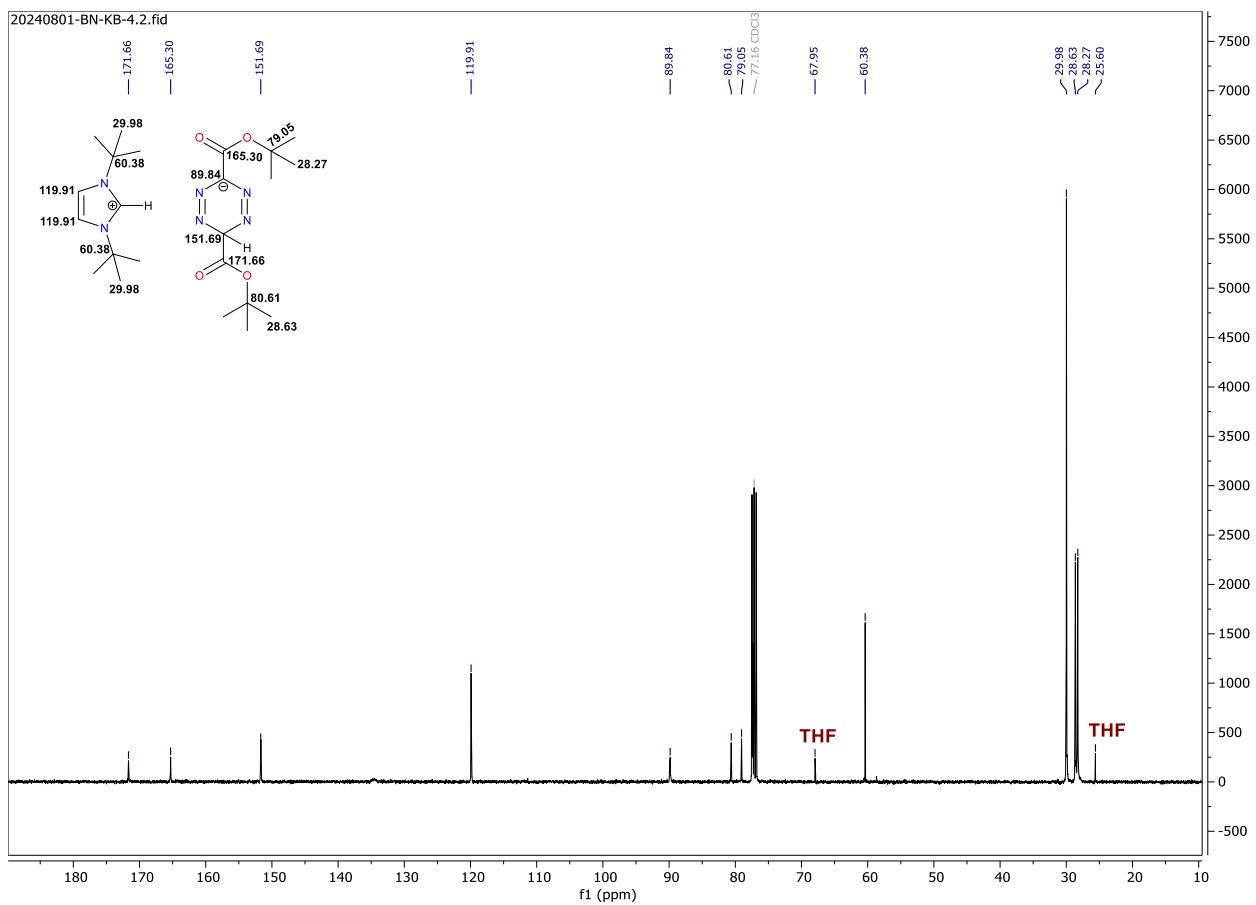

**Figure S69:**  $^{13}\text{C}\{^1\text{H}\}$  NMR spectrum of **13** in  $\text{CDCl}_3$

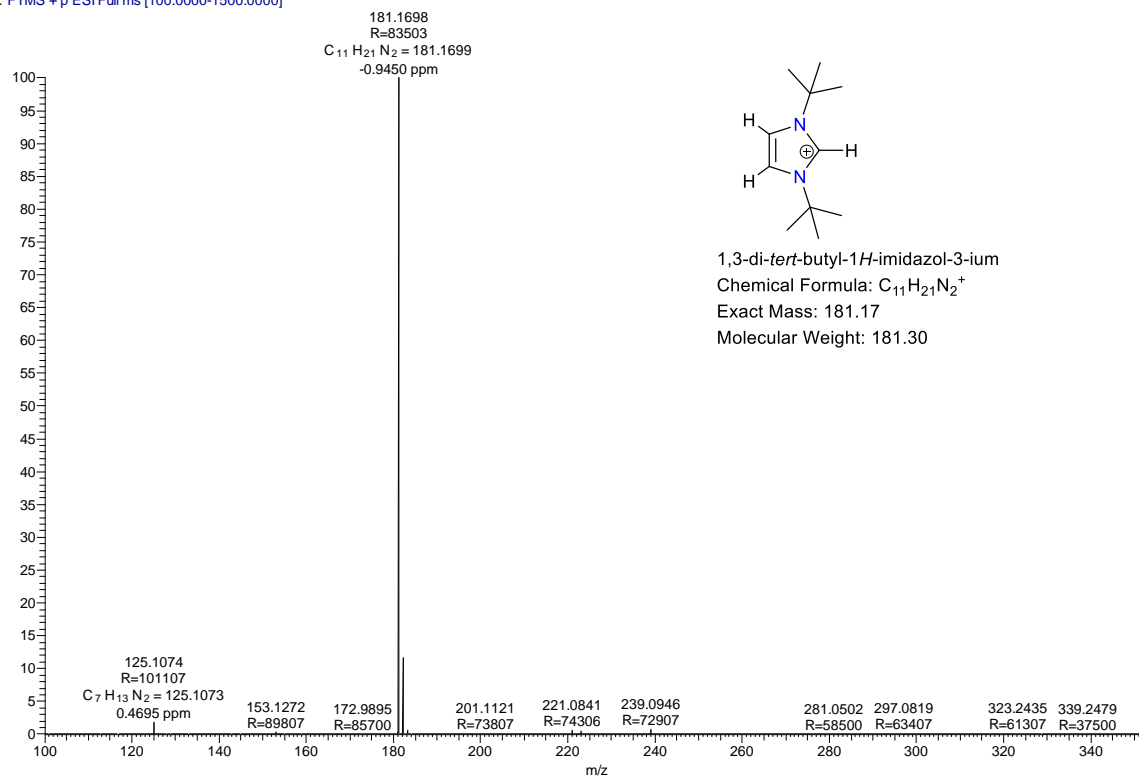

Figure S70: HRMS spectrum of 13

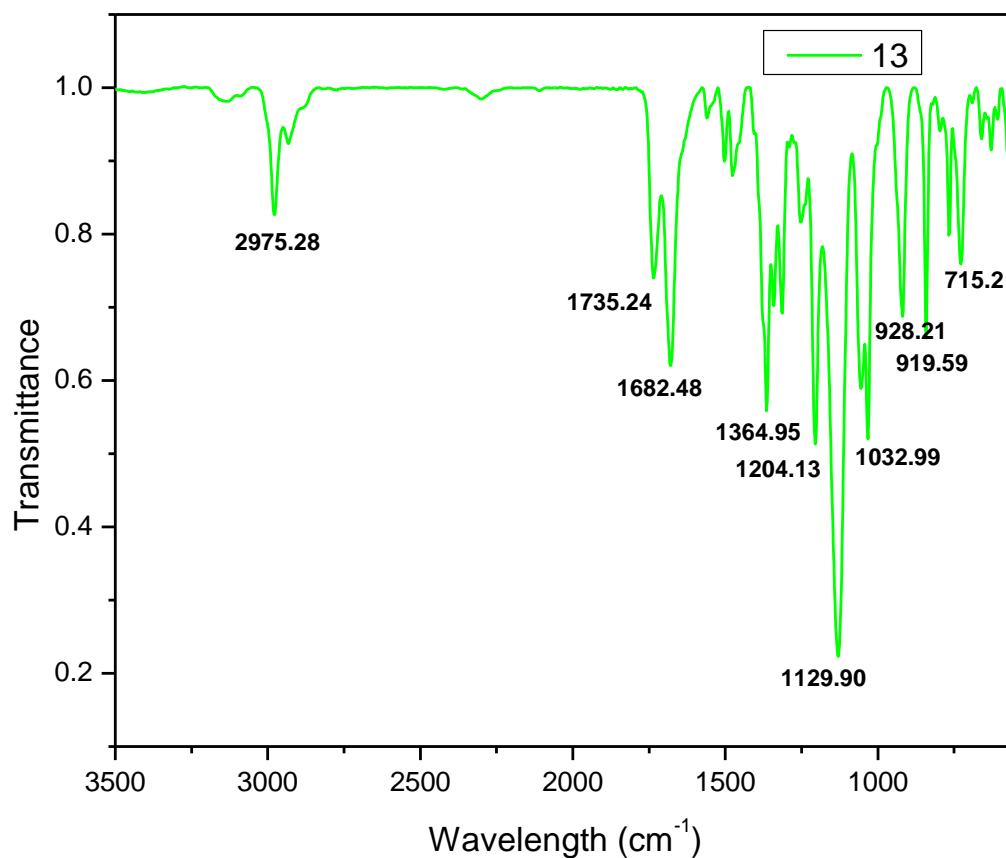

Figure S71: IR (ATR) spectrum of 13

**$^1\text{H}$  NMR (500 MHz, 298 K,  $\text{C}_6\text{D}_6$ ) of 14:**  $\delta$ =1.48 (singlet, 18 H,  $\text{C}(\text{CH}_3)_3$ ), 1.54 (singlet, 18 H,  $\text{COO}^t\text{Bu}$ ), 6.14 (singlet, 2 H,  $\text{NCHCHN}$ ), 7.88 ( $\text{CHCOO}^t\text{Bu}$ ) ppm.

**$^{13}\text{C}\{^1\text{H}\}$  NMR (101 MHz, 298 K,  $\text{C}_6\text{D}_6$ ) of 14:**  $\delta$ = 28.74 ( $\text{COO}(\text{CH}_3)_3$ ), 29.82 ( $\text{C}(\text{CH}_3)_3$ ), 58.51 ( $\text{C}(\text{CH}_3)_3$ ), 78.39 ( $\text{COO}(\text{CH}_3)_3$ ), 111.25 ( $\text{NCHCHN}$ ), 131.56 ( $\text{CHCOO}^t\text{Bu}$ ), 153.91 ( $\text{NCN}$ ), 166.27 ( $\text{COO}^t\text{Bu}$ ) ppm.

**HRMS:**  $m/z$  calcd for  $[\text{M}+\text{H}]^+$ :  $\text{C}_{17}\text{H}_{31}\text{N}_4\text{O}_2$ , 323.45; found 323.24.

**IR ( $\text{cm}^{-1}$ ):** 2975.28, 1676.30, 1548.46, 1441.24, 1364.95, 1107.22, 983.88, 661.86.

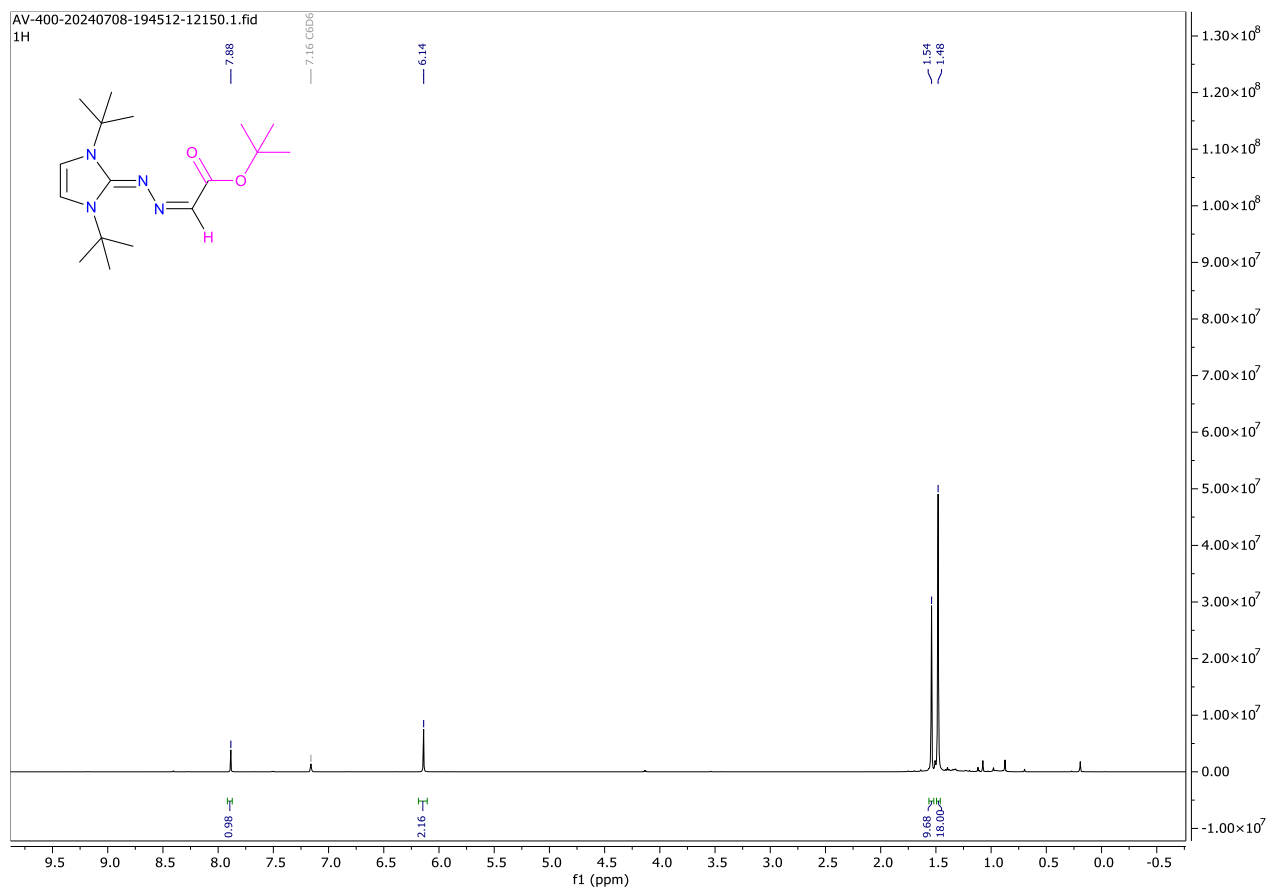

**Figure S72:**  $^1\text{H}$  NMR spectrum of **14** (smaller peaks in the region 1.5-0 ppm belong to little impurities)

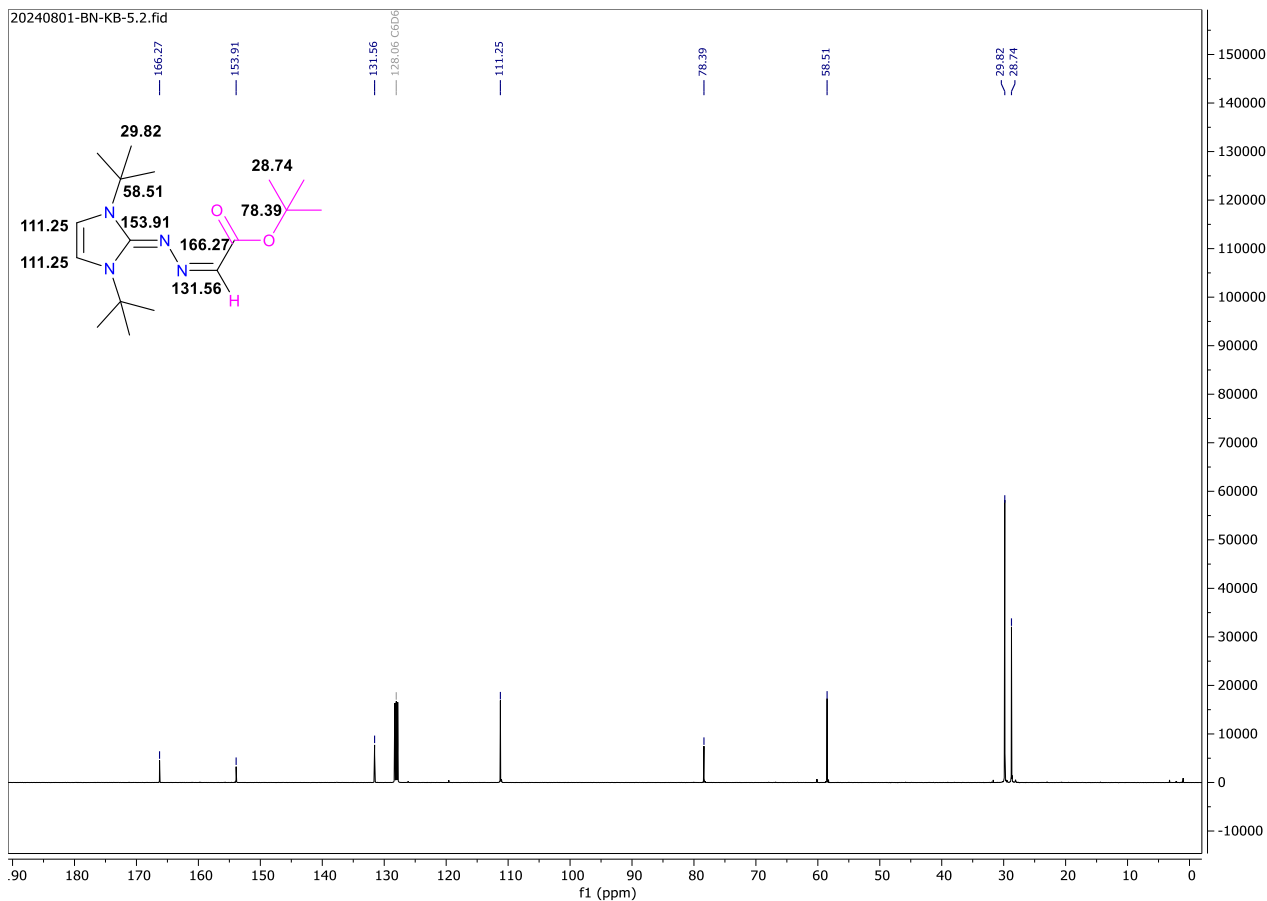

KB-2 #289 RT: 1.29 AV: 1 NL: 1.50E10  
T: FTMS + p ESI Full ms [100.0000-1500.0000]

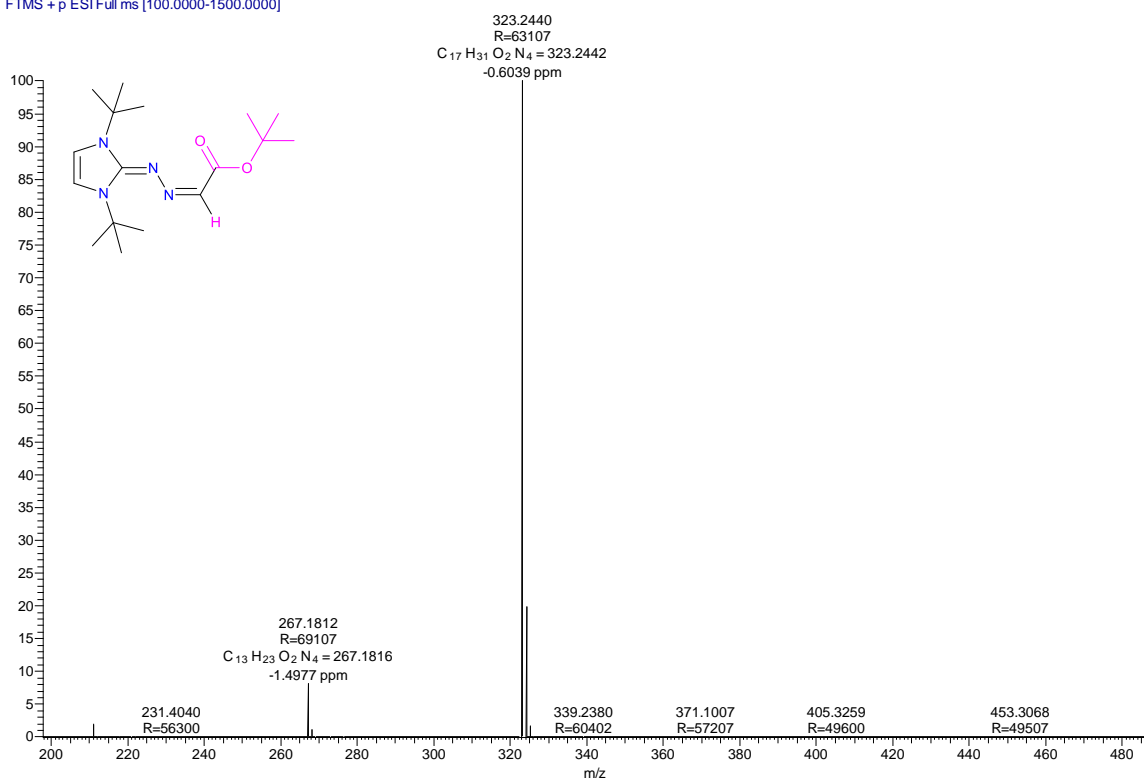

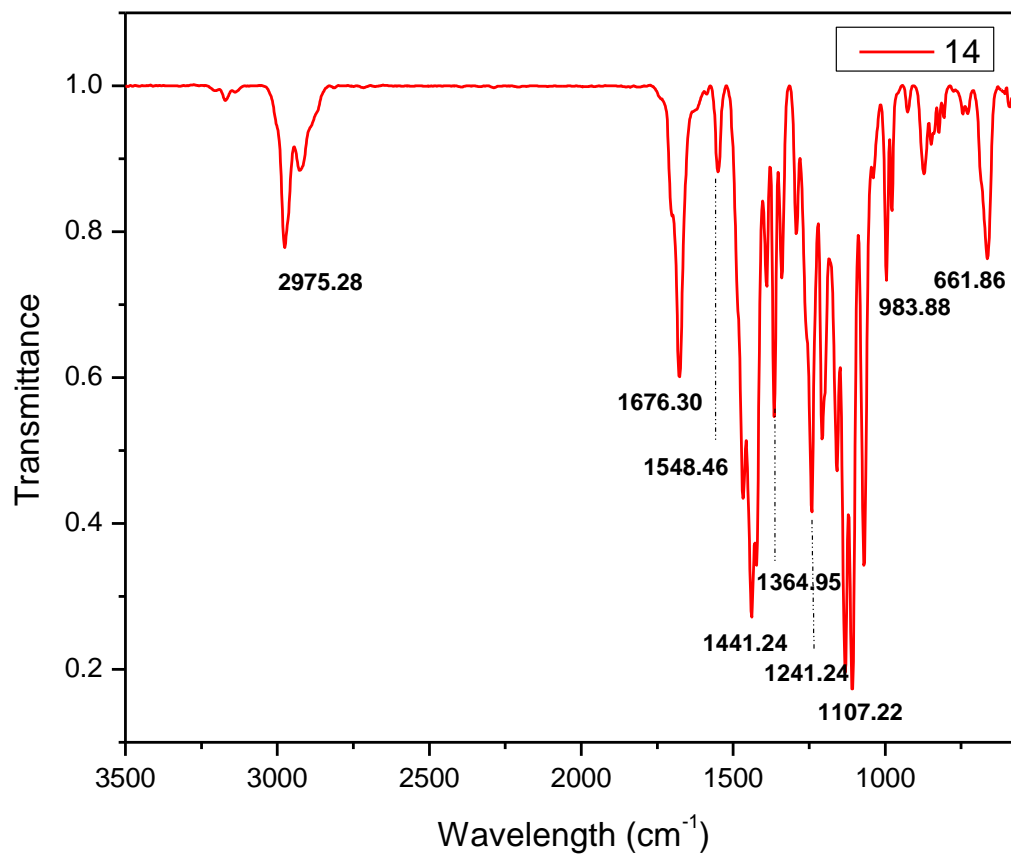

**Figure S75:** IR (ATR) spectrum of **14**

### 3. Miscellaneous Information

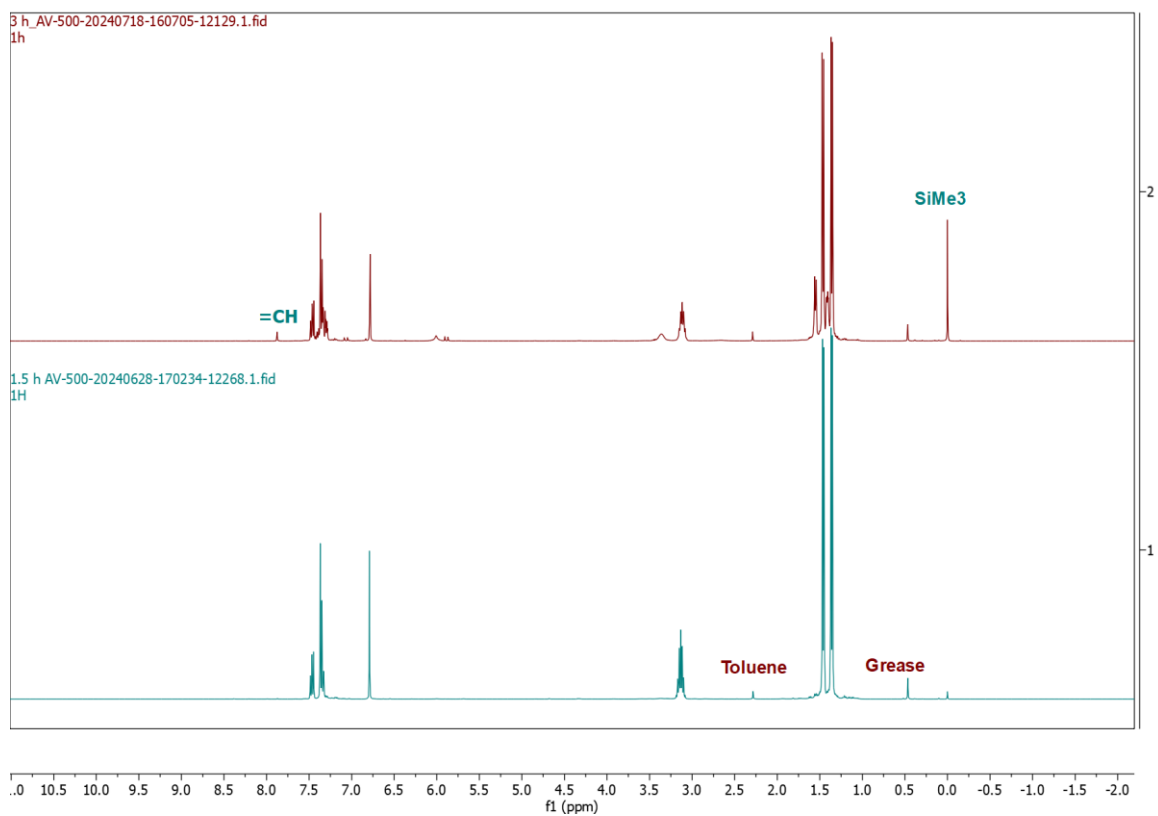

**Figure MS1:** Time dependents NMR recorded after reaction at low T for 1.5 h and after 3 h respectively.

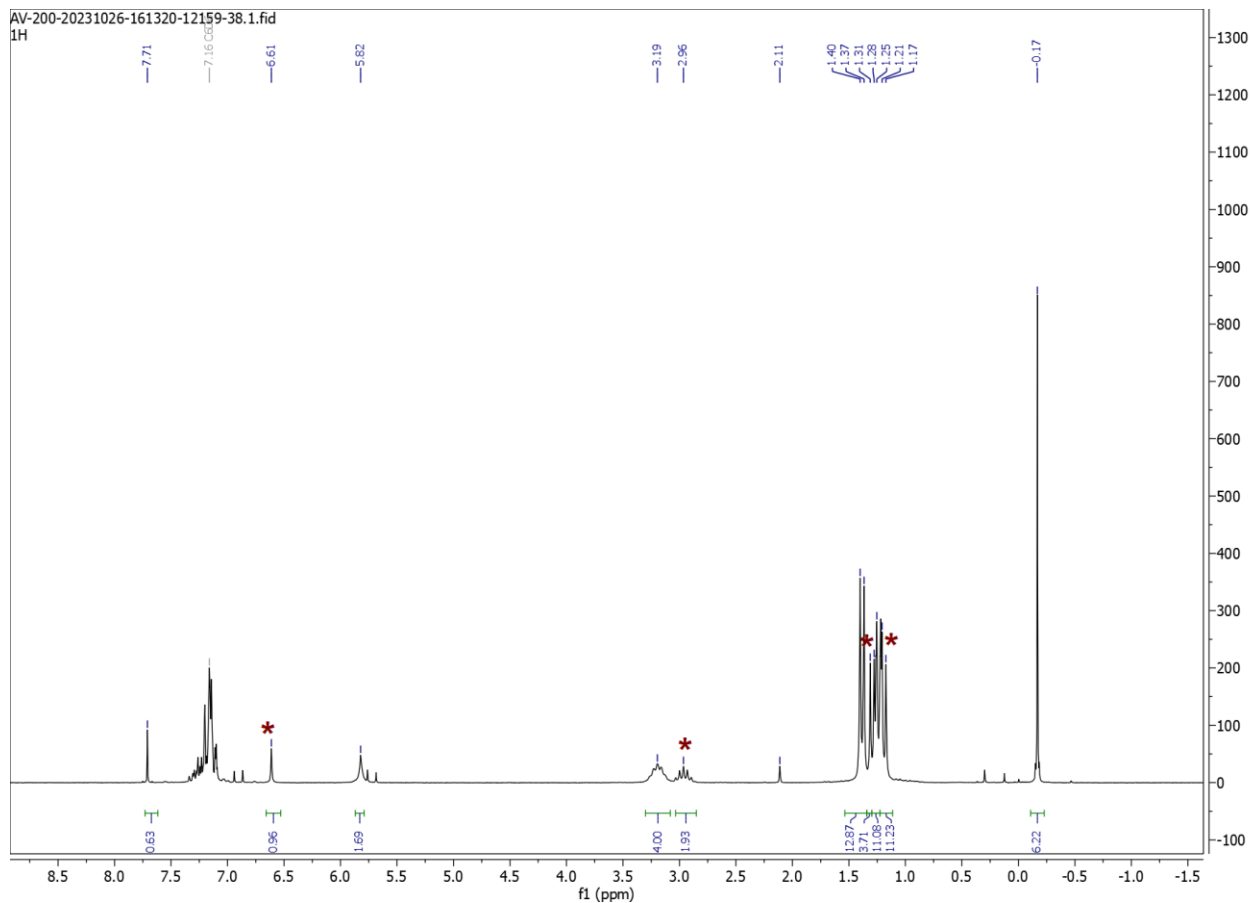

**Figure MS2:** <sup>1</sup>H NMR of the reaction mixture recorded after 10 h (Red asterisks belong to unreacted 5-IPr indicating around 53% conversion)

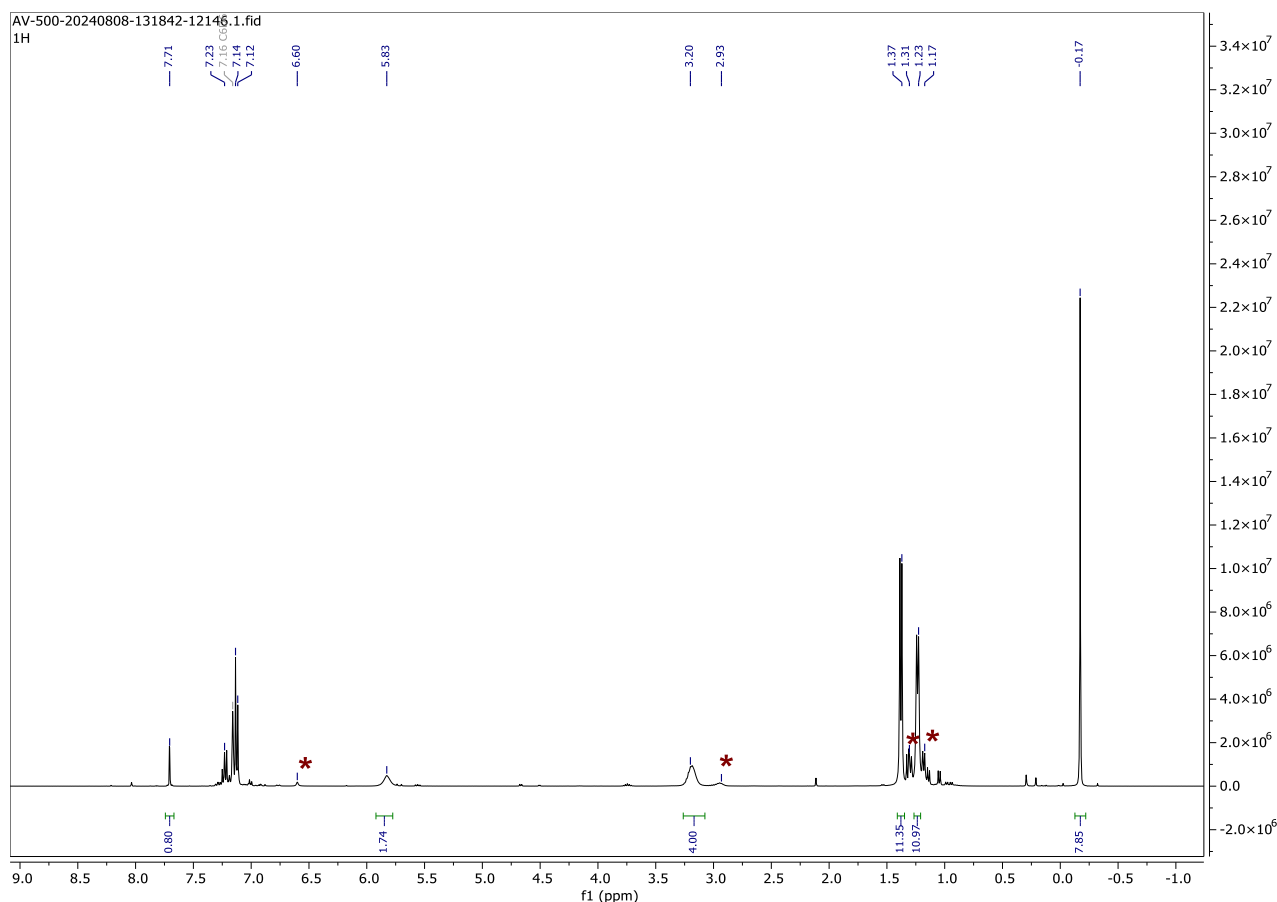

**Figure MS3:**  $^1\text{H}$  NMR of the reaction mixture recorded after 15 h (red asterisks belong to unreacted 5-IPr indicating around 95% conversion)

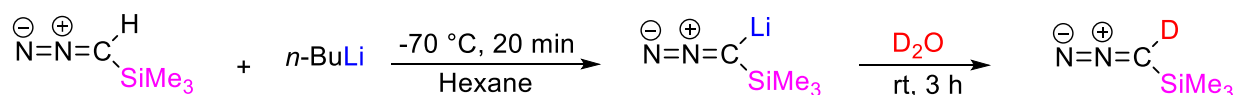

### Scheme MS1: Synthesis of $\text{SiMe}_3\text{CDN}_2$ using a modified procedure<sup>2</sup>

To confirm the source of triazole at the H, we have synthesized  $\text{SiMe}_3\text{CDN}_2$  using a slightly modified procedure. When we performed the NMR tube reaction of 5-IPrBu (0.010g, 0.055 mmol) with 0.36 M  $\text{SiMe}_3\text{CDN}_2$  (0.15 mL, 0.055 mmol) in  $\text{C}_6\text{D}_6$ , a color change from yellow to red was observed after 12 h, along with the formation of a red-colored precipitate. But, we consistently ended up with the hydrolyzed product **7a**, due to the presence of the adventitious amount of water ( $\text{SiMe}_3\text{CDN}_2$  preparation requires  $\text{D}_2\text{O}$  which may always contain some amount of  $\text{H}_2\text{O}$ ).



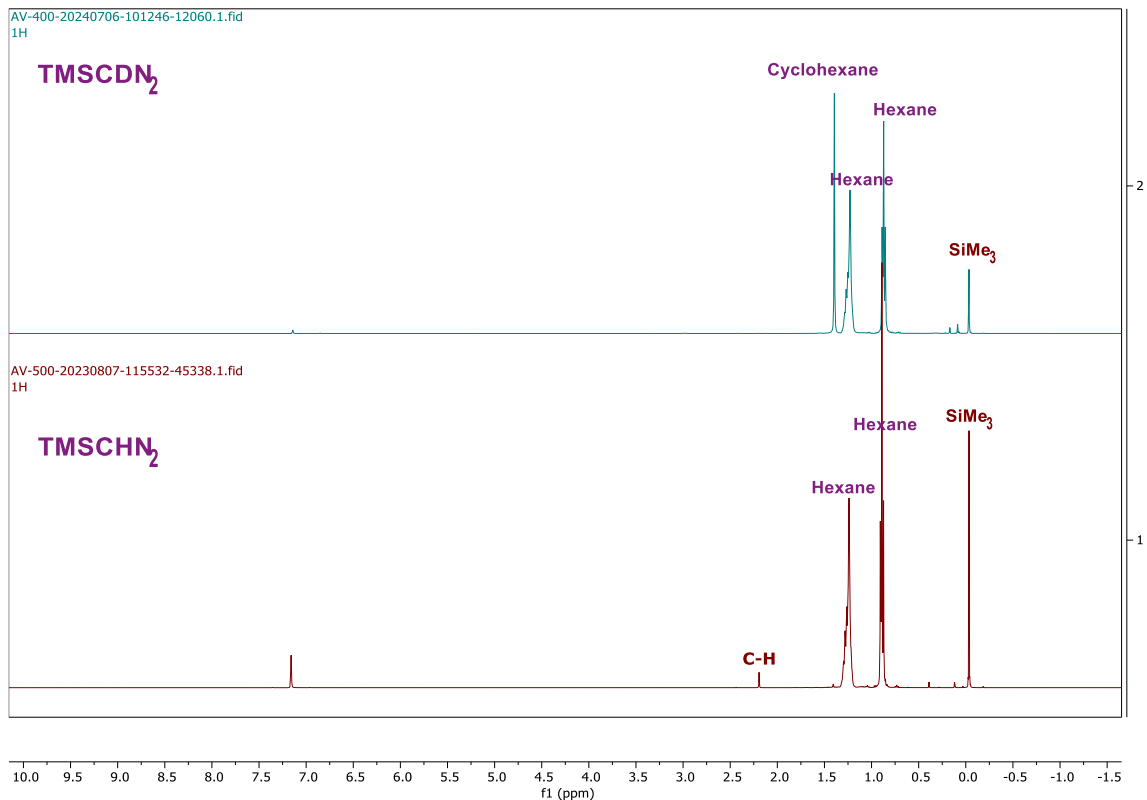

**Figure MS4:**  $^1\text{H}$  NMR of  $\text{SiMe}_3\text{CDN}_2$  (0.36 M in hexane), Peak corresponding to C-H at 2.19 ppm disappeared

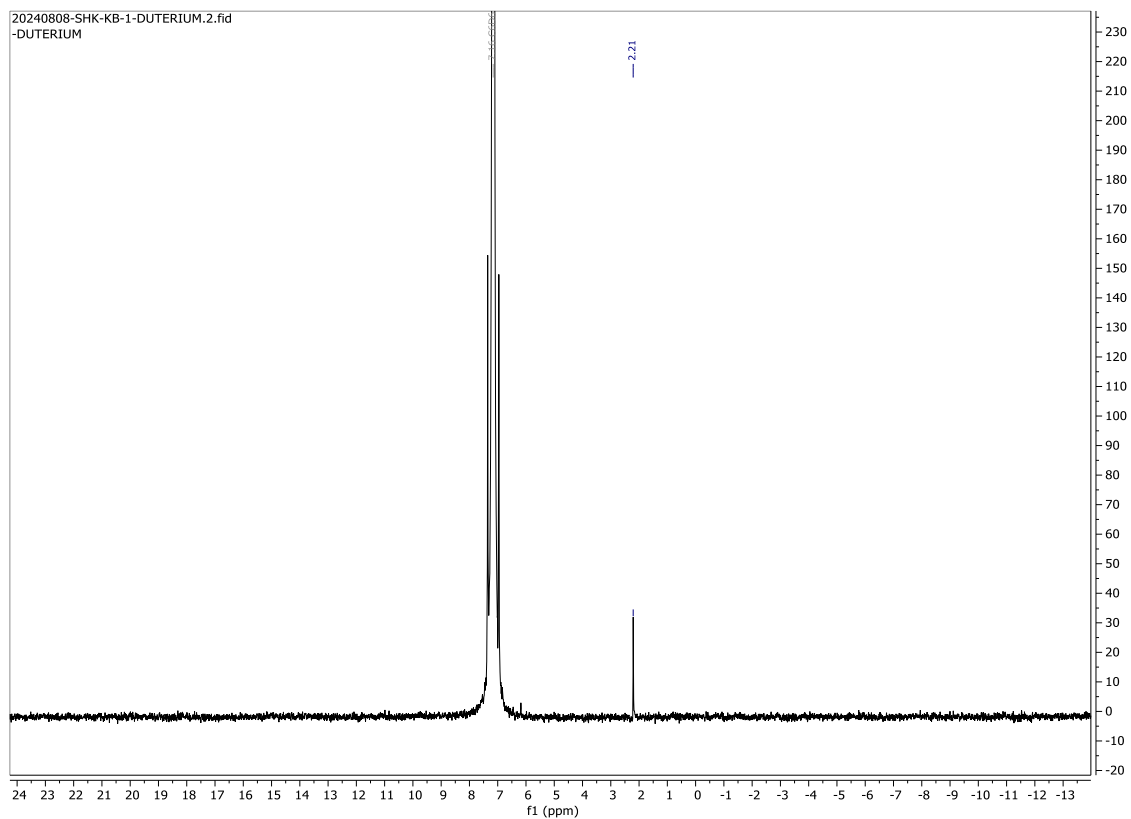

**Figure MS5:**  $^2\text{H}$  NMR of  $\text{SiMe}_3\text{CDN}_2$  (0.36 M in hexane), Peak corresponding to C-D appears at 2.21 ppm.

#### 4. Crystallographic data for the structural analysis

X-ray intensity data measurements were carried out on a Bruker SMART APEX II single crystal X-ray CCD diffractometer with graphite-monochromatized (Mo-K $\alpha$  = 0.71073 Å) radiation. The X-ray generator was operated at 50 kV and 30 mA. A preliminary set of cell constants and an orientation matrix were calculated from three sets of 36 frames. Data were collected with  $\omega$  scan width of 0.5 ° at different settings of  $\phi$  and  $2\theta$  keeping the sample-to-detector distance fixed at 5.00 cm. The X-ray data collection was monitored by the APEX3 program (Bruker, 2006).<sup>3</sup> All the data were corrected for Lorentzian, polarization, and absorption effects using SAINT and SADABS programs (Bruker, 2006). SHELX-97 was used for structure solution and full-matrix least-squares refinement on F<sup>2</sup>.<sup>4</sup> All the hydrogen atoms were placed in geometrically idealized position and constrained to ride on their parent atoms. All the hydrogen atoms were placed in geometrically idealized positions and constrained to ride on their parent atoms. An ORTEPIII<sup>5</sup> view was drawn with 50% probability displacement ellipsoids and H atoms omitted for clarity.

| Identification code                   | 5_SIPr_TMSCHN2<br>(1)                             | mo_KB_6TMSCHN2_1_0m<br>_a(3)                      |
|---------------------------------------|---------------------------------------------------|---------------------------------------------------|
| CCDC Number                           | 2347293                                           | 2347305                                           |
| Empirical formula                     | C <sub>31</sub> H <sub>48</sub> N <sub>4</sub> Si | C <sub>32</sub> H <sub>50</sub> N <sub>4</sub> Si |
| Formula weight                        | 504.82                                            | 518.85                                            |
| Temperature/K                         | 100(2)                                            | 100(2)                                            |
| Crystal system                        | triclinic                                         | triclinic                                         |
| Space group                           | <i>P</i> -1                                       | <i>P</i> -1                                       |
| <i>a</i> /Å                           | 8.281(4)                                          | 12.2095(15)                                       |
| <i>b</i> /Å                           | 10.126(5)                                         | 16.906(2)                                         |
| <i>c</i> /Å                           | 19.388(8)                                         | 17.394(2)                                         |
| $\alpha$ /°                           | 86.625(9)                                         | 102.647(4)                                        |
| $\beta$ /°                            | 85.739(10)                                        | 102.612(4)                                        |
| $\gamma$ /°                           | 72.015(11)                                        | 109.020(4)                                        |
| Volume/Å <sup>3</sup>                 | 1541.0(13)                                        | 3144.5(7)                                         |
| <i>Z</i>                              | 2                                                 | 4                                                 |
| $\rho_{\text{calc}}$ /cm <sup>3</sup> | 1.088                                             | 1.096                                             |
| $\mu$ /mm <sup>-1</sup>               | 0.101                                             | 0.100                                             |

|                                               |                                                                  |                                                                    |
|-----------------------------------------------|------------------------------------------------------------------|--------------------------------------------------------------------|
| F(000)                                        | 552.0                                                            | 1136.0                                                             |
| Crystal size/mm <sup>3</sup>                  | 0.36 × 0.24 × 0.22                                               | 0.35 × 0.22 × 0.12                                                 |
| Radiation                                     | MoK $\alpha$ ( $\lambda$ = 0.71073)                              | MoK $\alpha$ ( $\lambda$ = 0.71073)                                |
| 2 $\theta$ range for data collection/°        | 4.216 to 51.998                                                  | 4.226 to 55.998                                                    |
| Index ranges                                  | -10 ≤ h ≤ 10, -12 ≤ k ≤ 12,<br>0 ≤ l ≤ 23                        | -16 ≤ h ≤ 15, -20 ≤ k ≤ 22, -<br>22 ≤ l ≤ 22                       |
| Reflections collected                         | 6079                                                             | 64237                                                              |
| Independent reflections                       | 6079 [ $R_{\text{int}}$ = 0.108,<br>$R_{\text{sigma}}$ = 0.0449] | 15012 [ $R_{\text{int}}$ = 0.0569,<br>$R_{\text{sigma}}$ = 0.0480] |
| Data/restraints/parameters                    | 6079/0/338                                                       | 15012/12/716                                                       |
| Goodness-of-fit on $F^2$                      | 1.121                                                            | 1.060                                                              |
| Final R indexes [ $I \geq 2\sigma(I)$ ]       | $R_1$ = 0.0713, $wR_2$ =<br>0.1624                               | $R_1$ = 0.0752, $wR_2$ = 0.2309                                    |
| Final R indexes [all data]                    | $R_1$ = 0.0842, $wR_2$ =<br>0.1726                               | $R_1$ = 0.0872, $wR_2$ = 0.2393                                    |
| Largest diff. peak/hole / e $\text{\AA}^{-3}$ | 0.48/-0.40                                                       | 0.83/-0.41                                                         |

|                                       |                                                   |                                                |
|---------------------------------------|---------------------------------------------------|------------------------------------------------|
| Identification code                   | <b>4_mo_IdippTMSCHN2_07_06_0ma_a (4)</b>          | <b>mo_IDippCHN2TMS_0ma_a (5)</b>               |
| CCDC Number                           | 2363380                                           | 2347306                                        |
| Empirical formula                     | C <sub>31</sub> H <sub>46</sub> N <sub>4</sub> Si | C <sub>28</sub> H <sub>38</sub> N <sub>4</sub> |
| Formula weight                        | 502.81                                            | 430.62                                         |
| Temperature/K                         | 100(2)                                            | 100(2)                                         |
| Crystal system                        | monoclinic                                        | monoclinic                                     |
| Space group                           | $P2_1/c$                                          | $P2_1/c$                                       |
| a/ $\text{\AA}$                       | 10.2595(8)                                        | 19.9625(12)                                    |
| b/ $\text{\AA}$                       | 19.2221(14)                                       | 6.8258(4)                                      |
| c/ $\text{\AA}$                       | 16.2971(13)                                       | 19.8501(12)                                    |
| $\alpha$ /°                           | 90                                                | 90                                             |
| $\beta$ /°                            | 107.065(3)                                        | 105.828(2)                                     |
| $\gamma$ /°                           | 90                                                | 90                                             |
| Volume/ $\text{\AA}^3$                | 3072.4(4)                                         | 2602.2(3)                                      |
| Z                                     | 4                                                 | 4                                              |
| $\rho_{\text{calc}}$ /cm <sup>3</sup> | 1.087                                             | 1.099                                          |

|                                                |                                                                       |                                                                  |
|------------------------------------------------|-----------------------------------------------------------------------|------------------------------------------------------------------|
| $\mu/\text{mm}^{-1}$                           | 0.101                                                                 | 0.065                                                            |
| F(000)                                         | 1096.0                                                                | 936.0                                                            |
| Crystal size/ $\text{mm}^3$                    | $0.35 \times 0.19 \times 0.05$                                        | $0.2 \times 0.13 \times 0.05$                                    |
| Radiation                                      | MoK $\alpha$ ( $\lambda = 0.71073$ )                                  | MoK $\alpha$ ( $\lambda = 0.71073$ )                             |
| 2 $\theta$ range for data collection/ $^\circ$ | 4.712 to 55.998                                                       | 5.13 to 60.052                                                   |
| Index ranges                                   | $-13 \leq h \leq 13$ , $-25 \leq k \leq 25$ ,<br>$-21 \leq l \leq 21$ | $-28 \leq h \leq 23$ , $-9 \leq k \leq 9$ , $-25 \leq l \leq 27$ |
| Reflections collected                          | 162231                                                                | 31733                                                            |
| Independent reflections                        | 7424 [ $R_{\text{int}} = 0.1501$ ,<br>$R_{\text{sigma}} = 0.0466$ ]   | 7569 [ $R_{\text{int}} = 0.1105$ , $R_{\text{sigma}} = 0.1155$ ] |
| Data/restraints/parameters                     | 7424/0/356                                                            | 7569/0/297                                                       |
| Goodness-of-fit on $F^2$                       | 1.039                                                                 | 1.011                                                            |
| Final R indexes [ $I \geq 2\sigma(I)$ ]        | $R_1 = 0.0517$ , $wR_2 = 0.1161$                                      | $R_1 = 0.0748$ , $wR_2 = 0.1565$                                 |
| Final R indexes [all data]                     | $R_1 = 0.0839$ , $wR_2 = 0.1385$                                      | $R_1 = 0.1640$ , $wR_2 = 0.2014$                                 |
| Largest diff. peak/hole / $e \text{ \AA}^{-3}$ | 0.37/-0.38                                                            | 0.58/-0.28                                                       |

|                        |                                                           |                                        |
|------------------------|-----------------------------------------------------------|----------------------------------------|
| Identification code    | <b>mo_kb_hcl1_0ma_a (5a)</b>                              | <b>mo_ItBu_TMSCHN2_0m_a (6)</b>        |
| CCDC Number            | 2347322                                                   | 2347308                                |
| Empirical formula      | $\text{C}_{28}\text{H}_{39.5}\text{ClN}_4\text{O}_{0.25}$ | $\text{C}_{13}\text{H}_{21}\text{N}_5$ |
| Formula weight         | 471.58                                                    | 247.35                                 |
| Temperature/K          | 298(2)                                                    | 100(2)                                 |
| Crystal system         | triclinic                                                 | orthorhombic                           |
| Space group            | <i>P</i> -1                                               | <i>Pbca</i>                            |
| $a/\text{\AA}$         | 9.461(3)                                                  | 12.1510(4)                             |
| $b/\text{\AA}$         | 11.622(4)                                                 | 11.9324(5)                             |
| $c/\text{\AA}$         | 12.759(4)                                                 | 18.7244(8)                             |
| $\alpha/^\circ$        | 82.729(9)                                                 | 90                                     |
| $\beta/^\circ$         | 82.161(9)                                                 | 90                                     |
| $\gamma/^\circ$        | 89.987(9)                                                 | 90                                     |
| Volume/ $\text{\AA}^3$ | 1378.4(7)                                                 | 2714.86(19)                            |
| Z                      | 2                                                         | 8                                      |

|                                                |                                                                     |                                                                    |
|------------------------------------------------|---------------------------------------------------------------------|--------------------------------------------------------------------|
| $\rho_{\text{calc}}/\text{cm}^3$               | 1.136                                                               | 1.210                                                              |
| $\mu/\text{mm}^{-1}$                           | 0.161                                                               | 0.077                                                              |
| F(000)                                         | 509.0                                                               | 1072.0                                                             |
| Crystal size/ $\text{mm}^3$                    | 0.15 × 0.11 × 0.05                                                  | 0.23 × 0.15 × 0.11                                                 |
| Radiation                                      | MoK $\alpha$ ( $\lambda = 0.71073$ )                                | MoK $\alpha$ ( $\lambda = 0.71073$ )                               |
| 2 $\theta$ range for data collection/ $^\circ$ | 4.346 to 50                                                         | 5.256 to 60.136                                                    |
| Index ranges                                   | -11 ≤ h ≤ 11, -13 ≤ k ≤ 13,<br>-14 ≤ l ≤ 15                         | -17 ≤ h ≤ 17, -16 ≤ k ≤ 16, -26<br>≤ l ≤ 26                        |
| Reflections collected                          | 32894                                                               | 52191                                                              |
| Independent reflections                        | 4849 [ $R_{\text{int}} = 0.2524$ ,<br>$R_{\text{sigma}} = 0.1770$ ] | 3968 [ $R_{\text{int}} = 0.0693$ , $R_{\text{sigma}} =$<br>0.0400] |
| Data/restraints/parameters                     | 4849/0/314                                                          | 3968/0/169                                                         |
| Goodness-of-fit on $F^2$                       | 0.843                                                               | 1.056                                                              |
| Final R indexes [ $I \geq 2\sigma(I)$ ]        | $R_1 = 0.0563$ , $wR_2 =$<br>0.1145                                 | $R_1 = 0.0474$ , $wR_2 = 0.1268$                                   |
| Final R indexes [all data]                     | $R_1 = 0.1284$ , $wR_2 =$<br>0.1320                                 | $R_1 = 0.0626$ , $wR_2 = 0.1350$                                   |
| Largest diff. peak/hole / $e \text{ \AA}^{-3}$ | 0.25/-0.28                                                          | 0.36/-0.30                                                         |

|                        |                                                   |                                                |
|------------------------|---------------------------------------------------|------------------------------------------------|
| Identification code    | <b>mo_KB_ItBuNNCHTMS<br/>_0m_a (7)</b>            | <b>7a_mo_KB_ItBuNNCH<br/>2_0ma_a (7a)</b>      |
| CCDC Number            | 2347310                                           | 2386081                                        |
| Empirical formula      | C <sub>15</sub> H <sub>30</sub> N <sub>4</sub> Si | C <sub>12</sub> H <sub>22</sub> N <sub>4</sub> |
| Formula weight         | 294.52                                            | 222.33                                         |
| Temperature/K          | 100(2)                                            | 100(2)                                         |
| Crystal system         | triclinic                                         | monoclinic                                     |
| Space group            | <i>P</i> -1                                       | <i>P</i> 2 <sub>1</sub> / <i>c</i>             |
| $a/\text{\AA}$         | 10.1752(12)                                       | 11.0142(5)                                     |
| $b/\text{\AA}$         | 18.596(3)                                         | 10.0702(4)                                     |
| $c/\text{\AA}$         | 19.949(3)                                         | 12.5419(6)                                     |
| $\alpha/^\circ$        | 105.886(4)                                        | 90                                             |
| $\beta/^\circ$         | 94.060(5)                                         | 110.769(2)                                     |
| $\gamma/^\circ$        | 91.388(4)                                         | 90                                             |
| Volume/ $\text{\AA}^3$ | 3617.7(8)                                         | 1300.69(10)                                    |

|                                                |                                                                      |                                                                    |
|------------------------------------------------|----------------------------------------------------------------------|--------------------------------------------------------------------|
| Z                                              | 8                                                                    | 4                                                                  |
| $\rho_{\text{calc}}/\text{cm}^3$               | 1.081                                                                | 1.135                                                              |
| $\mu/\text{mm}^{-1}$                           | 0.128                                                                | 0.071                                                              |
| F(000)                                         | 1296.0                                                               | 488.0                                                              |
| Crystal size/ $\text{mm}^3$                    | 0.32 × 0.24 × 0.19                                                   | 0.34 × 0.27 × 0.11                                                 |
| Radiation                                      | MoK $\alpha$ ( $\lambda = 0.71073$ )                                 | MoK $\alpha$ ( $\lambda = 0.71073$ )                               |
| 2 $\theta$ range for data collection/ $^\circ$ | 4.468 to 50.998                                                      | 5.332 to 60.21                                                     |
| Index ranges                                   | -12 ≤ h ≤ 12, -22 ≤ k ≤ 22,<br>-24 ≤ l ≤ 24                          | -15 ≤ h ≤ 15, -14 ≤ k ≤ 14, -17<br>≤ l ≤ 17                        |
| Reflections collected                          | 106350                                                               | 87928                                                              |
| Independent reflections                        | 13424 [ $R_{\text{int}} = 0.0725$ ,<br>$R_{\text{sigma}} = 0.0417$ ] | 3806 [ $R_{\text{int}} = 0.0577$ , $R_{\text{sigma}} =$<br>0.0185] |
| Data/restraints/parameters                     | 13424/0/757                                                          | 3806/0/153                                                         |
| Goodness-of-fit on $F^2$                       | 1.222                                                                | 1.093                                                              |
| Final R indexes [ $I \geq 2\sigma(I)$ ]        | $R_1 = 0.1004$ , $wR_2 =$<br>0.2341                                  | $R_1 = 0.0378$ , $wR_2 = 0.1066$                                   |
| Final R indexes [all data]                     | $R_1 = 0.1098$ , $wR_2 =$<br>0.2382                                  | $R_1 = 0.0412$ , $wR_2 = 0.1104$                                   |
| Largest diff. peak/hole / e $\text{\AA}^{-3}$  | 0.74/-0.50                                                           | 0.36/-0.19                                                         |

|                     |                                                                  |                                                               |
|---------------------|------------------------------------------------------------------|---------------------------------------------------------------|
| Identification code | <b>mo_KB_090320</b><br><b>24_0m_a (8)</b>                        | <b>mo_KB_6diazoeester</b><br><b>_0ma_a (9)</b>                |
| CCDC Number         | 2347311                                                          | 2347313                                                       |
| Empirical formula   | C <sub>34</sub> H <sub>50</sub> N <sub>4</sub> O <sub>2</sub> Si | C <sub>34</sub> H <sub>50</sub> N <sub>4</sub> O <sub>2</sub> |
| Formula weight      | 574.87                                                           | 546.78                                                        |
| Temperature/K       | 296(2)                                                           | 100(2)                                                        |
| Crystal system      | monoclinic                                                       | monoclinic                                                    |
| Space group         | $P2_1/n$                                                         | $P2_1/n$                                                      |
| a/ $\text{\AA}$     | 9.8892(6)                                                        | 10.5986(12)                                                   |
| b/ $\text{\AA}$     | 15.8752(11)                                                      | 14.3442(17)                                                   |
| c/ $\text{\AA}$     | 21.8134(13)                                                      | 21.841(3)                                                     |
| $\alpha/^\circ$     | 90                                                               | 90                                                            |

|                                                |                                                                     |                                                                    |
|------------------------------------------------|---------------------------------------------------------------------|--------------------------------------------------------------------|
| $\beta/^\circ$                                 | 95.043(2)                                                           | 100.144(3)                                                         |
| $\gamma/^\circ$                                | 90                                                                  | 90                                                                 |
| Volume/ $\text{\AA}^3$                         | 3411.3(4)                                                           | 3268.5(7)                                                          |
| Z                                              | 4                                                                   | 4                                                                  |
| $\rho_{\text{calc}}/\text{cm}^3$               | 1.119                                                               | 1.111                                                              |
| $\mu/\text{mm}^{-1}$                           | 0.103                                                               | 0.069                                                              |
| F(000)                                         | 1248.0                                                              | 1192.0                                                             |
| Crystal size/ $\text{mm}^3$                    | 0.2 × 0.17 × 0.08                                                   | 0.21 × 0.17 × 0.08                                                 |
| Radiation                                      | MoK $\alpha$ ( $\lambda = 0.71073$ )                                | MoK $\alpha$ ( $\lambda = 0.71073$ )                               |
| 2 $\theta$ range for data collection/ $^\circ$ | 4.388 to 56.692                                                     | 4.63 to 56.8                                                       |
| Index ranges                                   | -11 ≤ h ≤ 13, -21 ≤ k ≤ 21,<br>-29 ≤ l ≤ 27                         | -14 ≤ h ≤ 14, -19 ≤ k ≤ 19, -29<br>≤ l ≤ 29                        |
| Reflections collected                          | 100908                                                              | 86204                                                              |
| Independent reflections                        | 8490 [ $R_{\text{int}} = 0.1250$ ,<br>$R_{\text{sigma}} = 0.0729$ ] | 8174 [ $R_{\text{int}} = 0.0935$ , $R_{\text{sigma}} =$<br>0.0479] |
| Data/restraints/parameters                     | 8490/0/383                                                          | 8174/0/372                                                         |
| Goodness-of-fit on $F^2$                       | 1.025                                                               | 1.112                                                              |
| Final R indexes [ $I \geq 2\sigma(I)$ ]        | $R_1 = 0.0633$ , $wR_2 =$<br>0.1185                                 | $R_1 = 0.0720$ , $wR_2 = 0.1571$                                   |
| Final R indexes [all data]                     | $R_1 = 0.1194$ , $wR_2 =$<br>0.1397                                 | $R_1 = 0.0994$ , $wR_2 = 0.1707$                                   |
| Largest diff. peak/hole / $e \text{\AA}^{-3}$  | 0.44/-0.38                                                          | 0.51/-0.40                                                         |

|                         |                                                               |                                                               |
|-------------------------|---------------------------------------------------------------|---------------------------------------------------------------|
| Identification code     | <b>mo_Kb_5Sipr_</b><br><b>diazoester_0m_a (10)</b>            | <b>mo_KB_5ldipp</b><br><b>_ester_0m_a (11)</b>                |
| CCDC Number             | 2347315                                                       | 2347321                                                       |
| Empirical formula       | C <sub>33</sub> H <sub>48</sub> N <sub>4</sub> O <sub>2</sub> | C <sub>40</sub> H <sub>54</sub> N <sub>4</sub> O <sub>2</sub> |
| Formula weight          | 532.75                                                        | 622.87                                                        |
| Temperature/K           | 100(2)                                                        | 100(2)                                                        |
| Crystal system          | monoclinic                                                    | monoclinic                                                    |
| Space group             | <i>P</i> 2 <sub>1</sub> / <i>c</i>                            | <i>P</i> 2 <sub>1</sub> / <i>c</i>                            |
| <i>a</i> / $\text{\AA}$ | 11.1953(7)                                                    | 12.6958(10)                                                   |
| <i>b</i> / $\text{\AA}$ | 13.1685(9)                                                    | 17.2563(11)                                                   |
| <i>c</i> / $\text{\AA}$ | 21.7390(15)                                                   | 18.3270(13)                                                   |

|                                                |                                                                     |                                                                    |
|------------------------------------------------|---------------------------------------------------------------------|--------------------------------------------------------------------|
| $\alpha/^\circ$                                | 90                                                                  | 90                                                                 |
| $\beta/^\circ$                                 | 99.457(2)                                                           | 107.659(2)                                                         |
| $\gamma/^\circ$                                | 90                                                                  | 90                                                                 |
| Volume/ $\text{\AA}^3$                         | 3161.3(4)                                                           | 3825.9(5)                                                          |
| Z                                              | 4                                                                   | 4                                                                  |
| $\rho_{\text{calc}}/\text{g/cm}^3$             | 1.119                                                               | 1.081                                                              |
| $\mu/\text{mm}^{-1}$                           | 0.070                                                               | 0.067                                                              |
| F(000)                                         | 1160.0                                                              | 1352.0                                                             |
| Crystal size/ $\text{mm}^3$                    | 0.13 × 0.1 × 0.09                                                   | 0.25 × 0.22 × 0.16                                                 |
| Radiation                                      | MoK $\alpha$ ( $\lambda = 0.71073$ )                                | MoK $\alpha$ ( $\lambda = 0.71073$ )                               |
| 2 $\theta$ range for data collection/ $^\circ$ | 4.948 to 56.65                                                      | 4.194 to 56.676                                                    |
| Index ranges                                   | -14 ≤ h ≤ 13, -17 ≤ k ≤ 17,<br>-28 ≤ l ≤ 29                         | -16 ≤ h ≤ 16, -23 ≤ k ≤ 22, -<br>24 ≤ l ≤ 24                       |
| Reflections collected                          | 58847                                                               | 95864                                                              |
| Independent reflections                        | 7854 [ $R_{\text{int}} = 0.0897$ ,<br>$R_{\text{sigma}} = 0.0555$ ] | 9522 [ $R_{\text{int}} = 0.1131$ , $R_{\text{sigma}} =$<br>0.0613] |
| Data/restraints/parameters                     | 7854/0/363                                                          | 9522/180/577                                                       |
| Goodness-of-fit on $F^2$                       | 1.063                                                               | 1.038                                                              |
| Final R indexes [ $I \geq 2\sigma(I)$ ]        | $R_1 = 0.0578$ , $wR_2 =$<br>0.1171                                 | $R_1 = 0.0705$ , $wR_2 = 0.1334$                                   |
| Final R indexes [all data]                     | $R_1 = 0.0882$ , $wR_2 =$<br>0.1298                                 | $R_1 = 0.1226$ , $wR_2 = 0.1556$                                   |
| Largest diff. peak/hole / $e \text{\AA}^{-3}$  | 0.24/-0.24                                                          | 0.21/-0.26                                                         |

|                     |                                                               |                                                               |
|---------------------|---------------------------------------------------------------|---------------------------------------------------------------|
| Identification code | <b>14_mo_KB_19012024</b><br><b>_0m_a (13)</b>                 | <b>mo_Kb_ItBuester_0m_</b><br><b>a (14)</b>                   |
| CCDC Number         | 2375811                                                       | 2363384                                                       |
| Empirical formula   | C <sub>23</sub> H <sub>40</sub> N <sub>6</sub> O <sub>4</sub> | C <sub>17</sub> H <sub>30</sub> N <sub>4</sub> O <sub>2</sub> |
| Formula weight      | 464.61                                                        | 322.45                                                        |
| Temperature/K       | 224(2)                                                        | 100(2)                                                        |
| Crystal system      | monoclinic                                                    | orthorhombic                                                  |
| Space group         | P2 <sub>1</sub> /c                                            | Pbca                                                          |
| a/ $\text{\AA}$     | 13.505(3)                                                     | 11.4307(12)                                                   |



|                                                |                                                                   |                                                                   |
|------------------------------------------------|-------------------------------------------------------------------|-------------------------------------------------------------------|
| b/Å                                            | 12.601(2)                                                         | 11.4548(13)                                                       |
| c/Å                                            | 17.615(3)                                                         | 28.925(3)                                                         |
| $\alpha$ /°                                    | 90                                                                | 90                                                                |
| $\beta$ /°                                     | 110.277(6)                                                        | 90                                                                |
| $\gamma$ /°                                    | 90                                                                | 90                                                                |
| Volume/Å <sup>3</sup>                          | 2811.9(9)                                                         | 3787.3(7)                                                         |
| Z                                              | 4                                                                 | 8                                                                 |
| $\rho_{\text{calc}}$ /cm <sup>3</sup>          | 1.097                                                             | 1.131                                                             |
| $\mu$ /mm <sup>-1</sup>                        | 0.076                                                             | 0.076                                                             |
| F(000)                                         | 1008.0                                                            | 1408.0                                                            |
| Crystal size/mm <sup>3</sup>                   | 0.19 × 0.16 × 0.1                                                 | 0.29 × 0.25 × 0.11                                                |
| Radiation                                      | MoK $\alpha$ ( $\lambda$ =<br>0.71073)                            | MoK $\alpha$ ( $\lambda$ = 0.71073)                               |
| 2 $\theta$ range for data<br>collection/°      | 4.93 to 50.99                                                     | 5.228 to 55.998                                                   |
| Index ranges                                   | -16 ≤ h ≤ 16, -15 ≤<br>k ≤ 15, -21 ≤ l ≤ 21                       | -15 ≤ h ≤ 15, -15 ≤ k ≤<br>15, -38 ≤ l ≤ 38                       |
| Reflections collected                          | 81214                                                             | 109842                                                            |
| Independent reflections                        | 5224 [ $R_{\text{int}}$ = 0.0961,<br>$R_{\text{sigma}}$ = 0.0338] | 4567 [ $R_{\text{int}}$ = 0.1792,<br>$R_{\text{sigma}}$ = 0.0553] |
| Data/restraints/<br>parameters                 | 5224/135/412                                                      | 4567/0/218                                                        |
| Goodness-of-fit on $F^2$                       | 1.031                                                             | 1.103                                                             |
| Final R indexes [ $I \geq 2\sigma(I)$ ]        | $R_1$ = 0.0683, $wR_2$ =<br>0.1766                                | $R_1$ = 0.0608, $wR_2$ =<br>0.1184                                |
| Final R indexes [all data]                     | $R_1$ = 0.0895, $wR_2$ =<br>0.1929                                | $R_1$ = 0.1040, $wR_2$ =<br>0.1396                                |
| Largest diff. peak/hole / e<br>Å <sup>-3</sup> | 0.35/-0.29                                                        | 0.24/-0.24                                                        |

**Table S1 and S2: Compound 6 Tau value**

| <b>5-Membered Ring (1)</b>   | <b>N1</b>       | <b>C1</b>       | <b>N2</b>       | <b>C2</b>       | <b>C3</b>       |
|------------------------------|-----------------|-----------------|-----------------|-----------------|-----------------|
|                              | sp <sup>2</sup> |
| <b>Dev (A) from CPplane</b>  | 0.0053(11)      | -0.0038(12)     | 0.0009(11)      | 0.0024(13)      | -0.0048(13)     |
| <b>Cs(I)-Asym-Par (Deg)</b>  | 0.18(13)        | 0.87(13)        | 1.22(13)        | 1.11(13)        | 0.58(13)        |
| <b>C2(I)-Asym-Par (Deg)</b>  | 1.58(13)        | 1.15(12)        | 0.27(13)        | 0.71(13)        | 1.42(13)        |
| <b>Ring Bond Angle (Deg)</b> | 108.55(9)       | 107.94(9)       | 108.22(9)       | 108.07(10)      | 107.22(10)      |

No C & P - Puckering analysis since  $\langle \text{Tau} \rangle = 0.6 < 5.0$  Deg.

| <b>5-Membered Ring (2)</b>   | <b>N3</b>       | <b>C12</b>      | <b>N5</b>       | <b>N4</b>       | <b>C13</b>      |
|------------------------------|-----------------|-----------------|-----------------|-----------------|-----------------|
|                              | sp <sup>2</sup> |
| <b>Dev (A) from CPplane</b>  | -0.0048(11)     | 0.0032(12)      | -0.0004(12)     | -0.0025(13)     | 0.0045(13)      |
| <b>Cs(I)-Asym-Par (Deg)</b>  | 0.28(15)        | 0.85(14)        | 1.18(15)        | 1.03(15)        | 0.44(14)        |
| <b>C2(I)-Asym-Par (Deg)</b>  | 1.47(15)        | 0.99(14)        | 0.14(14)        | 0.78(15)        | 1.39(15)        |
| <b>Ring Bond Angle (Deg)</b> | 99.53(9)        | 115.30(10)      | 104.38(10)      | 105.43(10)      | 115.35(11)      |

No C & P - Puckering analysis since  $\langle \text{Tau} \rangle = 0.6 < 5.0$  Deg.

## 5. DFT calculations

Quantum chemical calculations were performed using density functional theory (DFT) with the Turbomole 7.5 suite of programs.<sup>6</sup> The geometries of all species, including reactants, products, and transition states, were optimized using the PBE functional<sup>7</sup> and the def-TZVP basis set.<sup>8</sup> To account for long-range interactions, Grimme's dispersion correction (D3) was applied.<sup>9</sup> The efficiency and accuracy of the electronic Coulomb term in the DFT calculations were enhanced by employing the resolution of identity (RI) approximation<sup>10</sup> and the multipole accelerated resolution of identity (marij) approximations.<sup>11</sup> Solvent effects were included by performing optimizations using the COSMO model<sup>12</sup>, with toluene ( $\epsilon = 2.374$ ) specified as the solvent. To confirm whether the stationary points corresponded to local minima or transition states, harmonic frequency calculations were conducted at 298.15 K. The reported  $\Delta G$  values include corrections for zero-point energy, as well as internal energy and entropy contributions derived from frequency calculations on the optimized minima. The absence of imaginary frequencies confirmed that the structures were either reactants or products, while the presence of a single imaginary frequency indicated a transition state. Additionally, intrinsic reaction coordinate (IRC)<sup>13</sup> calculations were performed for all transition states to ensure their validity and to confirm the correct identification of reactant and product structures. Translational entropy values were corrected using the free volume correction introduced by Mammen et al.,<sup>14</sup> which is based on the Sackur-Tetrode equation. This correction provides a physically intuitive adjustment for the translational entropy of molecules in solution.

Finally, to refine the calculations further, single-point energy calculations were performed using the hybrid PBE0 functional<sup>15</sup> with a higher basis set, def2-TZVP, on the geometries optimized at the PBE-D3/defTZVP + COSMO ( $\epsilon = 2.38$ ) level of theory. Solvent effects were again considered, using toluene ( $\epsilon = 2.38$ ) *via* the COSMO solvation model. Consequently, all kinetic and thermodynamic results are reported based on the PBE0-D3/def2TZVP + COSMO ( $\epsilon = 2.38$ )/PBE-D3/defTZVP + COSMO ( $\epsilon = 2.38$ ) level of theory.

## 6. References:

1. (a) M. Iglesias, D. J. Beetstra, J. C. Knight, L.-L. Ooi, A. Stasch, S. Coles, L. Male, M. B. Hursthouse, K. J. Cavell, A. Dervisi and I. A. Fallis, *Organometallics* 2008, **27**, 3279-3289. (b) A. J. Arduengo III, R. Krafczyk, R. Schmutzler, H. A. Craig, J. R. Goerlich, W. M. Marshall and M. Unverzagt, *Tetrahedron* 1999, **55**, 14523-14534. (c) A. C. Filippou, O. Chernov, G. Schakenburg, *Chem. Eur. J.* 2011, **17**, 13574–13583. (d) N. M. Scott, R. Dorta, E. D. Stevens, A. Correa, L. Cavallo and S. P. Nolan, *J. Am. Chem. Soc.* 2005, **127**, 3516–3526. (e) T. W. Hudnall and C. W. Bielawski, *J. Am. Chem. Soc.* 2009, **131**, 16039–16041.
2. S. Stockerl, T. Danelzik, D. G. Piekarski and O. G. Mancheno, *Org. Lett.*, 2019, **21**, 4535-4539.
3. (a) APEX3, SAINT-Plus and SADABS; Bruker AXS Inc.: Madison, WI, USA, 2006. (b) Apex CCD and SAINT v8.30C; Bruker AXS Inc.: Madison, WI, USA, 2013.
4. (a) G. M. Sheldrick, A short history of SHELX. *Acta Crystallogr.*, 2008, **A64**, 112-122. (b) L. Krause, R. Herbst-Irmer, G. M. Sheldrick and D. Stalke, *J. Appl. Crystallogr.*, 2015, **48**, 3-10. (c) L. Krause, R. Herbst-Irmer and D. Stalke, *J. Appl. Crystallogr.*, 2015, **48**, 1907-1913.
5. L. J. Farrugia, *J. Appl. Cryst.*, 1997, **30**, 565-565.
6. TURBOMOLE V7.5 2020, a development of University of Karlsruhe and Forschungszentrum Karlsruhe GmbH, 1989-2007, TURBOMOLE GmbH, since 2007; available from <http://www.turbomole.org>.
7. (a) J. P. Perdew, K. Burke and M. Ernzerhof, *Phys. Rev. Lett.*, 1996, **77**, 3865-3868. (b) M. Ernzerhof and G. E. Scuseria, *J. Chem. Phys.*, 1999, **110**, 5029-5036.
8. (a) F. Weigend and R. Ahlrichs, *Phys. Chem. Chem. Phys.*, 2005, **7**, 3297-3305. (b) A. Schafer, H. Horn and R. Ahlrichs, *J. Chem. Phys.*, 1992, **97**, 2571-2577.
9. S. Grimme, J. Antony, S. Ehrlich and H. Krieg, *J. Chem. Phys.*, 2010, **132**, 154104.
10. K. Eichkorn, O. Treutler, H. Ohm, M. Haser and R. Ahlrichs, *Chem. Phys. Lett.*, 1995, **240**, 283-290.
11. M. Sierka, A. Hogekamp and R. Ahlrichs, *J. Chem. Phys.*, 2003, **118**, 9136-9148.

12. A. Klamt and G. Schuurmann, *J. Chem. Soc., Perkin Trans. 2*, 1993, **5**, 799-805.
13. K. Fukui, *Acc. Chem. Res.*, 1981, **14**, 363-368.
14. M. Mammen, E. I. Shakhnovich, J. M. Deutch and G. M. Whitesides, *J. Org. Chem.*, 1998, **63**, 3821-3830.
15. (a) J. P. Perdew, M. Ernzerhof and K. Burke, *J. Chem. Phys.*, 1996, **105**, 9982-9985. (b) C. Adamo and V. Barone, *J. Chem. Phys.*, 1999, **110**, 6158-6170.

## 7. Optimized Cartesian Coordinates of all Stationary Points at the PBE0-D3/def2TZVP//PBE-D3/defTZVP level of theory

|                                             |            |                                        |            |            |            |            |            |
|---------------------------------------------|------------|----------------------------------------|------------|------------|------------|------------|------------|
| 17                                          |            | O                                      | -0.9435509 | 16.9751853 | 2.8157473  |            |            |
| <b>Diazoalkane</b> Energy = -557.1052335856 |            | N                                      | 0.3576803  | 15.6411871 | 5.5393300  |            |            |
| Si                                          | -0.9562619 | 0.0452544                              | -0.0001350 | N          | 0.6322854  | 16.5253113 | 4.8735300  |
| N                                           | 1.8036442  | -0.3951725                             | 0.0013664  | C          | 0.9204516  | 17.5323491 | 4.0909883  |
| N                                           | 2.8001611  | 0.1764171                              | -0.0004892 | H          | 1.7976191  | 18.1231697 | 4.3397796  |
| C                                           | -1.0160930 | 1.1395163                              | -1.5471400 | C          | 0.0922955  | 17.8456547 | 2.9277203  |
| C                                           | -2.3576801 | -1.2265102                             | 0.0005475  | C          | -1.9288066 | 17.0831005 | 1.7023827  |
| C                                           | -1.0196988 | 1.1447183                              | 1.5430647  | C          | -2.6666844 | 18.4198453 | 1.7864555  |
| C                                           | 0.6413771  | -0.9702731                             | 0.0031572  | H          | -3.4803203 | 18.4291320 | 1.0461787  |
| H                                           | -0.1550810 | 1.8245253                              | -1.5777314 | H          | -1.9951877 | 19.2609732 | 1.5796592  |
| H                                           | -1.0008254 | 0.5310475                              | -2.4628240 | H          | -3.1110788 | 18.5501000 | 2.7836103  |
| H                                           | -1.9322137 | 1.7501677                              | -1.5516631 | C          | -2.8741541 | 15.9191033 | 1.9943520  |
| H                                           | -3.3327703 | -0.7168178                             | -0.0014558 | H          | -3.6700171 | 15.8885618 | 1.2369185  |
| H                                           | -2.3072219 | -1.8694291                             | -0.8904136 | H          | -3.3376592 | 16.0357871 | 2.9838875  |
| H                                           | -2.3092483 | -1.8662819                             | 0.8938874  | H          | -2.3319423 | 14.9635410 | 1.9707487  |
| H                                           | -0.1590234 | 1.8301701                              | 1.5730688  | C          | -1.2205854 | 16.8888145 | 0.3611499  |
| H                                           | -1.9360859 | 1.7549947                              | 1.5436178  | H          | -1.9740215 | 16.8200341 | -0.4373013 |
| H                                           | -1.0060686 | 0.5394040                              | 2.4608637  | H          | -0.6422387 | 15.9537605 | 0.3660825  |
| H                                           | 0.6666910  | -2.0618311                             | 0.0069785  | H          | -0.5482916 | 17.7254069 | 0.1386022  |
| 20                                          |            | 67                                     |            |            |            |            |            |
| <b>Diazoester</b> Energy = -494.2147131556  |            | <b>5-SIPr</b> Energy = -1160.295798220 |            |            |            |            |            |
| O                                           | 0.3427618  | 18.7835957                             | 2.1807286  | N          | -0.5051902 | -0.0564544 | -1.0697104 |

|   |            |            |            |   |            |            |            |
|---|------------|------------|------------|---|------------|------------|------------|
| N | -0.6018991 | 0.0387178  | 1.0785204  | C | -0.7657944 | 3.5418011  | -2.9137437 |
| C | 0.2615226  | 0.0054117  | 0.0404140  | H | -0.3679367 | 3.8588332  | -3.8897953 |
| C | -1.9758046 | 0.0448488  | -0.8200222 | H | -0.8900577 | 4.4442250  | -2.2962280 |
| H | -2.5210820 | -0.7379249 | -1.3654635 | H | -1.7600573 | 3.1020275  | -3.0835447 |
| H | -2.3442487 | 1.0264206  | -1.1627320 | C | -0.2209304 | 0.0047902  | 2.4576027  |
| C | -2.0399714 | -0.1142540 | 0.7006601  | C | -0.1864134 | 1.2207585  | 3.1776994  |
| H | -2.6586615 | 0.6476490  | 1.1947009  | C | 0.1589819  | 1.1749377  | 4.5346914  |
| H | -2.4018236 | -1.1088136 | 1.0112080  | H | 0.1992218  | 2.0984245  | 5.1143947  |
| C | -0.0061858 | -0.0050254 | -2.4101074 | C | 0.4578993  | -0.0390827 | 5.1574066  |
| C | 0.1348948  | -1.2169164 | -3.1239077 | H | 0.7249552  | -0.0561156 | 6.2162840  |
| C | 0.5962053  | -1.1552576 | -4.4453609 | C | 0.4214400  | -1.2270011 | 4.4296440  |
| H | 0.7205788  | -2.0753566 | -5.0185831 | H | 0.6655800  | -2.1697353 | 4.9250111  |
| C | 0.9047503  | 0.0702219  | -5.0401679 | C | 0.0779840  | -1.2305241 | 3.0686652  |
| H | 1.2630405  | 0.0995885  | -6.0714689 | C | -0.4366334 | 2.5433243  | 2.4674886  |
| C | 0.7613200  | 1.2541879  | -4.3191683 | H | -1.1103112 | 2.3390616  | 1.6197270  |
| H | 1.0132455  | 2.2063709  | -4.7920331 | C | -1.1101983 | 3.6021117  | 3.3487003  |
| C | 0.3002856  | 1.2419035  | -2.9932880 | H | -1.3655463 | 4.4848047  | 2.7436466  |
| C | -0.1304909 | -2.5497869 | -2.4386765 | H | -0.4468450 | 3.9451627  | 4.1575105  |
| H | -0.8795296 | -2.3704652 | -1.6511421 | H | -2.0351336 | 3.2206882  | 3.8060876  |
| C | 1.1508964  | -3.0359135 | -1.7348305 | C | 0.8837171  | 3.0705212  | 1.8731527  |
| H | 1.9455374  | -3.2281284 | -2.4721786 | H | 1.3297756  | 2.3274503  | 1.1963506  |
| H | 0.9600250  | -3.9703045 | -1.1838855 | H | 1.6068135  | 3.2872976  | 2.6745887  |
| H | 1.5137469  | -2.2807982 | -1.0229420 | H | 0.7101906  | 3.9982012  | 1.3057767  |
| C | -0.6927595 | -3.6262994 | -3.3748571 | C | 0.0713844  | -2.5362461 | 2.2875279  |
| H | 0.0468375  | -3.9444125 | -4.1252199 | H | -0.2865937 | -2.3161358 | 1.2709577  |
| H | -1.5877121 | -3.2729776 | -3.9083652 | C | 1.4994306  | -3.0915740 | 2.1488037  |
| H | -0.9699469 | -4.5191166 | -2.7945570 | H | 1.4982962  | -4.0125383 | 1.5463213  |
| C | 0.1751824  | 2.5448433  | -2.2177861 | H | 1.9285090  | -3.3303819 | 3.1342160  |
| H | -0.2529601 | 2.3080973  | -1.2324730 | H | 2.1543178  | -2.3588029 | 1.6565340  |
| C | 1.5614899  | 3.1623439  | -1.9666466 | C | -0.8778162 | -3.5747976 | 2.9069440  |
| H | 2.0571683  | 3.4223768  | -2.9148790 | H | -1.9004873 | -3.1789061 | 2.9960558  |
| H | 2.2071589  | 2.4584543  | -1.4226254 | H | -0.5458820 | -3.8769506 | 3.9119288  |
| H | 1.4722206  | 4.0814476  | -1.3677679 | H | -0.9128219 | -4.4803748 | 2.2825801  |

70

6-SIPr Energy = -1199.575387597

N 7.5013853 7.7048051 14.8454788  
N 7.3017557 8.9043480 12.9130548  
C 6.7079381 8.1049846 13.8274879  
C 8.9309271 8.0557562 15.0270074  
H 9.4284505 7.2189217 15.5372609  
H 9.0152883 8.9393148 15.6837010  
C 9.5664252 8.3309076 13.6710844  
H 9.6259228 7.3928262 13.0962468  
H 10.5900630 8.7101469 13.7985451  
C 8.7182017 9.3422823 12.9116780  
H 8.7975631 10.3459004 13.3673591  
H 9.0480144 9.4326977 11.8661681  
C 6.4949594 9.4282445 11.8385588  
C 5.7717605 10.6211966 12.0391875  
C 5.0099097 11.1188355 10.9704174  
H 4.4300233 12.0348020 11.1024225  
C 4.9793749 10.4589866 9.7427243  
H 4.3821736 10.8612777 8.9213942  
C 5.7086451 9.2821164 9.5617355  
H 5.6697856 8.7703276 8.5982917  
C 6.4811680 8.7472182 10.6015058  
C 7.2159859 7.4252187 10.4338944  
H 8.0328453 7.4050408 11.1722075  
C 7.8446321 7.2401397 9.0466500  
H 8.4501320 6.3217462 9.0286813  
H 8.4963695 8.0860971 8.7817801  
H 7.0815370 7.1401624 8.2597950  
C 6.2701758 6.2603654 10.7827910  
H 6.8015847 5.2976231 10.7265460  
H 5.4230182 6.2283207 10.0802039

H 5.8719659 6.3823226 11.8008894  
C 5.7566895 11.3254613 13.3875067  
H 6.5707706 10.8991778 13.9932523  
C 6.0029895 12.8369896 13.2734599  
H 6.0698545 13.2868771 14.2756283  
H 5.1852642 13.3451384 12.7403556  
H 6.9396101 13.0508094 12.7370587  
C 4.4408936 11.0208722 14.1250423  
H 4.4333053 11.4969140 15.1173865  
H 4.3206746 9.9360559 14.2571114  
H 3.5770085 11.4002270 13.5570020  
C 6.9386919 6.8561789 15.8662059  
C 6.3959177 7.4436620 17.0294397  
C 5.9247248 6.5949775 18.0422831  
H 5.5015338 7.0270439 18.9519978  
C 5.9861499 5.2086914 17.9061185  
H 5.6173535 4.5636720 18.7065831  
C 6.5101411 4.6471358 16.7421125  
H 6.5431838 3.5601672 16.6378709  
C 6.9947380 5.4544850 15.7033208  
C 7.5629936 4.8121874 14.4460154  
H 7.7785173 5.6201379 13.7324936  
C 6.5421844 3.8777951 13.7773061  
H 6.9454860 3.4851449 12.8316650  
H 5.6076182 4.4121052 13.5550016  
H 6.2996142 3.0175417 14.4199125  
C 8.8801732 4.0739508 14.7417435  
H 9.3069427 3.6581410 13.8161554  
H 8.7184478 3.2404909 15.4428768  
H 9.6269455 4.7464831 15.1902621  
C 6.3171883 8.9530018 17.2054955  
H 6.6000949 9.4106478 16.2458103  
C 4.8872258 9.4162388 17.5282973

71

H 4.8416015 10.5153537 17.5646307  
H 4.5518977 9.0373745 18.5056161  
H 4.1771668 9.0691555 16.7648362  
C 7.3061999 9.4399107 18.2798026  
H 7.2839996 10.5377049 18.3578117  
H 8.3368283 9.1323167 18.0485342  
H 7.0486254 9.0253388 19.2670223

65

5-IPr Energy = -1159.095156084

N -1.0625745 -0.5628909 0.0452108  
N 1.0617404 -0.5135945 -0.0451353  
C -0.0209141 0.3336094 -0.0103044  
C -0.6484393 -1.8969409 0.0426468  
H -1.3453956 -2.7271297 0.0800162  
C 0.7112810 -1.8652360 -0.0121986  
H 1.4467698 -2.6621495 -0.0315187  
C 2.4246731 -0.0549041 -0.1016446  
C 3.0274888 0.1127971 -1.3659973  
C 4.3576306 0.5536574 -1.3967892  
H 4.8554832 0.6982635 -2.3569227  
C 5.0556990 0.8139514 -0.2159409  
H 6.0917702 1.1562312 -0.2612334  
C 4.4342197 0.6414827 1.0196600  
H 4.9886359 0.8538432 1.9365326  
C 3.1037905 0.2027334 1.1040826  
C 2.4341867 0.0420266 2.4610011  
H 1.4156505 -0.3364781 2.2907771  
C 3.1705166 -0.9819903 3.3402256  
H 2.6347372 -1.1236913 4.2910047  
H 4.1919258 -0.6479564 3.5789093  
H 3.2434440 -1.9584868 2.8387486  
C 2.3009181 1.4008581 3.1691897

H 1.7702496 1.2846112 4.1265005  
H 1.7368421 2.1109978 2.5481985  
H 3.2885663 1.8385745 3.3812979  
C 2.2375147 -0.1061905 -2.6485013  
H 1.4185982 -0.8056140 -2.4184449  
C 3.0671360 -0.7306850 -3.7778114  
H 2.4155622 -0.9645076 -4.6327462  
H 3.5553761 -1.6618863 -3.4543309  
H 3.8475618 -0.0454711 -4.1423996  
C 1.5930487 1.2197731 -3.0964798  
H 0.9799505 1.0643479 -3.9977668  
H 2.3677719 1.9657873 -3.3317725  
H 0.9479055 1.6237996 -2.3031902  
C -2.4456924 -0.1682338 0.0972523  
C -3.1364502 0.0438699 -1.1106941  
C -4.4863685 0.4195308 -1.0300587  
H -5.0504341 0.5954236 -1.9486478  
C -5.1154333 0.5736934 0.2039894  
H -6.1670937 0.8650662 0.2465943  
C -4.4056375 0.3592119 1.3872523  
H -4.9105515 0.4874861 2.3458965  
C -3.0556406 -0.0162863 1.3605032  
C -2.2543087 -0.1837548 2.6441174  
H -1.4231002 -0.8737098 2.4285725  
C -3.0645937 -0.7908067 3.7965873  
H -2.4022562 -0.9931500 4.6511896  
H -3.5430524 -1.7366913 3.5022592  
H -3.8508429 -0.1066564 4.1508653  
C -1.6332602 1.1665909 3.0518457  
H -1.0107916 1.0472929 3.9522038  
H -2.4217019 1.9022486 3.2739413  
H -1.0024936 1.5636513 2.2434498  
C -2.4575372 -0.0921207 -2.4656951



H -1.4347583 -0.4584703 -2.2939741  
C -3.1717756 -1.1131412 -3.3656163  
H -2.6222636 -1.2366749 -4.3110282  
H -4.1934757 -0.7881573 -3.6148475  
H -3.2397748 -2.0965810 -2.8772354  
C -2.3394625 1.2792393 -3.1527724  
H -1.8045607 1.1846075 -4.1101149  
H -1.7864832 1.9862319 -2.5185748  
H -3.3328299 1.7062686 -3.3601226

33

**5-*t*Bu** Energy = -540.2459832739

N 8.7356836 4.6541078 7.4681248  
N 7.9302184 4.4371757 9.4383392  
C 7.7351090 4.0143964 8.1501645  
C 9.0129619 5.3058840 9.5555873  
H 9.3406713 5.7494237 10.4877793  
C 9.5200794 5.4523904 8.2983220  
H 10.3584078 6.0476939 7.9575637  
C 8.8571643 4.5694465 5.9803892  
C 8.6918969 3.1026664 5.5605507  
H 8.7389258 3.0245702 4.4642050  
H 7.7291776 2.7143921 5.9140883  
H 9.4916010 2.4832828 5.9926193  
C 7.7446387 5.4320219 5.3626589  
H 7.7934094 5.3902054 4.2644527  
H 7.8479815 6.4815964 5.6763099  
H 6.7626151 5.0651877 5.6911128  
C 10.2318344 5.0824028 5.5350843  
H 10.3276979 4.9391479 4.4500358  
H 11.0449608 4.5275561 6.0254983  
H 10.3600732 6.1557070 5.7381805  
C 7.1070048 3.9118852 10.5707333

C 7.5036083 2.4452631 10.8058140  
H 6.9082915 2.0147000 11.6246859  
H 8.5686697 2.3703271 11.0714297  
H 7.3306373 1.8616473 9.8915107  
C 5.6261558 4.0097361 10.1793000  
H 5.0017819 3.5867832 10.9799958  
H 5.4464084 3.4601869 9.2470914  
H 5.3350052 5.0588888 10.0225567  
C 7.3643645 4.7364928 11.8366321  
H 6.7022802 4.3736531 12.6345917  
H 7.1472066 5.8023786 11.6742741  
H 8.3995488 4.6332646 12.1937609

84

**TS<sub>1</sub>** Energy = -1717.395922268

N -1.1977120 -1.0288500 0.2109637  
N 0.9706380 -1.1300498 0.5619315  
N 0.4309904 -0.1466044 -3.6369685  
N 0.2919791 0.6548095 -2.7925744  
C -0.0580417 -0.3273514 0.2666439  
C -0.9699593 -2.4786361 0.4642980  
H -1.6103789 -2.8244007 1.2869126  
C 0.5341363 -2.5303804 0.7983436  
H 0.7335209 -2.8075698 1.8443493  
C 2.2978171 -0.6911046 0.9023803  
C 3.3166744 -0.7500104 -0.0714262  
C 4.6111803 -0.3755674 0.3180637  
H 5.4189417 -0.4094610 -0.4154910  
C 4.8822550 0.0461328 1.6180889  
H 5.8974744 0.3354338 1.8977805  
C 3.8562369 0.1076541 2.5597816  
H 4.0752206 0.4483492 3.5740577  
C 2.5466241 -0.2629836 2.2259918

|   |            |            |            |    |            |            |            |
|---|------------|------------|------------|----|------------|------------|------------|
| C | 1.4528549  | -0.1811609 | 3.2798597  | H  | -2.0244224 | -1.4268499 | 2.9760216  |
| H | 0.5186287  | -0.5463106 | 2.8313593  | H  | -3.4151915 | -0.5857377 | 3.6929920  |
| C | 1.7568304  | -1.0766226 | 4.4922078  | C  | -2.6233285 | 2.0145761  | 2.9843909  |
| H | 0.9175084  | -1.0540830 | 5.2038187  | H  | -1.9111309 | 2.2595278  | 3.7853783  |
| H | 2.6577028  | -0.7388195 | 5.0264525  | H  | -3.6260926 | 1.9868656  | 3.4371780  |
| H | 1.9203127  | -2.1212036 | 4.1880178  | H  | -2.6018155 | 2.8325473  | 2.2499749  |
| C | 1.2106189  | 1.2759483  | 3.7086956  | C  | -2.6577046 | -1.5192036 | -2.2913366 |
| H | 0.3849180  | 1.3317804  | 4.4347214  | H  | -1.5732693 | -1.6158126 | -2.1305036 |
| H | 0.9548566  | 1.9082048  | 2.8456655  | C  | -3.2712700 | -2.9275138 | -2.3991530 |
| H | 2.1053297  | 1.7029187  | 4.1856276  | H  | -2.7961198 | -3.4911352 | -3.2159017 |
| C | 3.0554943  | -1.1900914 | -1.5013063 | H  | -4.3491569 | -2.8639849 | -2.6146073 |
| H | 1.9686443  | -1.2858792 | -1.6366473 | H  | -3.1556476 | -3.5040391 | -1.4692146 |
| C | 3.6900999  | -2.5636831 | -1.7824783 | C  | -2.8357902 | -0.7519654 | -3.6124910 |
| H | 3.4459571  | -2.8916192 | -2.8036938 | H  | -2.2745416 | -1.2524140 | -4.4133178 |
| H | 3.3302644  | -3.3307894 | -1.0795542 | H  | -2.4512876 | 0.2722571  | -3.5257772 |
| H | 4.7866491  | -2.5177749 | -1.6934180 | H  | -3.8940695 | -0.7048372 | -3.9113908 |
| C | 3.5407311  | -0.1377770 | -2.5112839 | C  | 0.1896238  | 1.4326806  | -1.7993386 |
| H | 3.2467692  | -0.4344073 | -3.5272345 | H  | 0.0812468  | 0.6764110  | -0.4249818 |
| H | 4.6354172  | -0.0260082 | -2.4852526 | Si | -0.4519799 | 3.1537613  | -1.6846857 |
| H | 3.0813787  | 0.8386853  | -2.3000105 | C  | 0.4558625  | 4.3378631  | -2.8692848 |
| C | -2.5074721 | -0.4604775 | 0.0499816  | H  | 0.3277410  | 4.0123925  | -3.9128332 |
| C | -3.2438291 | -0.7481079 | -1.1190413 | H  | 0.0686007  | 5.3652819  | -2.7815329 |
| C | -4.5585132 | -0.2653830 | -1.2024184 | H  | 1.5334696  | 4.3518626  | -2.6489380 |
| H | -5.1495394 | -0.4801144 | -2.0945015 | C  | -2.3235159 | 3.2492938  | -2.0463160 |
| C | -5.1091663 | 0.5060654  | -0.1841906 | H  | -2.8791634 | 2.5780456  | -1.3739944 |
| H | -6.1308155 | 0.8812902  | -0.2724414 | H  | -2.7065183 | 4.2736823  | -1.9117022 |
| C | -4.3461705 | 0.8226431  | 0.9399937  | H  | -2.5364009 | 2.9390328  | -3.0807730 |
| H | -4.7798172 | 1.4500359  | 1.7190721  | C  | -0.1613024 | 3.7066434  | 0.1133834  |
| C | -3.0373226 | 0.3475391  | 1.0883085  | H  | -0.6779577 | 3.0315827  | 0.8123403  |
| C | -2.2428015 | 0.6715540  | 2.3475331  | H  | 0.9116901  | 3.6873559  | 0.3553204  |
| H | -1.1832315 | 0.7477486  | 2.0576546  | H  | -0.5385548 | 4.7257940  | 0.2874220  |
| C | -2.3668601 | -0.4640954 | 3.3803808  | H  | -1.2137349 | -3.0605303 | -0.4343449 |
| H | -1.7672228 | -0.2409734 | 4.2760385  | H  | 1.0906622  | -3.2147815 | 0.1439007  |

84

Comp 1 Energy = -1717.445557754

|    |           |            |            |
|----|-----------|------------|------------|
| Si | 7.8658587 | 5.1974404  | 14.3705032 |
| N  | 5.2746359 | 2.2085771  | 13.4056442 |
| N  | 5.5994723 | 2.0848314  | 15.6658799 |
| N  | 5.1168013 | 4.9610312  | 14.4194794 |
| N  | 4.1333147 | 5.5595354  | 14.3793318 |
| C  | 6.1356844 | 2.7347335  | 14.4714368 |
| H  | 7.1951788 | 2.4349476  | 14.3405429 |
| C  | 4.4154505 | 1.1400014  | 13.9215825 |
| H  | 4.8679059 | 0.1327499  | 13.8260772 |
| H  | 3.4495713 | 1.1366507  | 13.3934843 |
| C  | 4.2767419 | 1.5287080  | 15.3916473 |
| H  | 3.4426817 | 2.2447203  | 15.5236402 |
| H  | 4.0864404 | 0.6620251  | 16.0416475 |
| C  | 5.7966238 | 2.1187483  | 12.0707640 |
| C  | 6.8647503 | 1.2426514  | 11.7433130 |
| C  | 7.3570671 | 1.2345316  | 10.4304345 |
| H  | 8.1836997 | 0.5678512  | 10.1728413 |
| C  | 6.8021711 | 2.0478793  | 9.4443519  |
| H  | 7.1999347 | 2.0274356  | 8.4272428  |
| C  | 5.7293850 | 2.8764948  | 9.7627327  |
| H  | 5.2834597 | 3.5006434  | 8.9846889  |
| C  | 5.2089291 | 2.9256580  | 11.0642742 |
| C  | 7.4799773 | 0.2817216  | 12.7514870 |
| H  | 6.9862335 | 0.4385098  | 13.7193894 |
| C  | 8.9847089 | 0.5340565  | 12.9425228 |
| H  | 9.5377012 | 0.3823329  | 12.0038765 |
| H  | 9.4007010 | -0.1563694 | 13.6909125 |
| H  | 9.1833390 | 1.5621802  | 13.2817851 |
| C  | 7.2191894 | -1.1820967 | 12.3533368 |
| H  | 7.7133803 | -1.4314593 | 11.4019980 |

|   |           |            |            |
|---|-----------|------------|------------|
| H | 6.1432106 | -1.3752187 | 12.2334064 |
| H | 7.6072099 | -1.8643437 | 13.1251638 |
| C | 4.0213958 | 3.8277247  | 11.3509014 |
| H | 3.8176910 | 3.7490664  | 12.4269973 |
| C | 4.3311501 | 5.2979802  | 11.0279984 |
| H | 4.4980660 | 5.4468723  | 9.9496800  |
| H | 5.2327518 | 5.6383794  | 11.5581682 |
| H | 3.4943644 | 5.9428050  | 11.3338042 |
| C | 2.7660475 | 3.3503656  | 10.5998343 |
| H | 2.9032441 | 3.4109176  | 9.5087077  |
| H | 1.8999028 | 3.9754891  | 10.8656434 |
| H | 2.5254366 | 2.3064003  | 10.8500640 |
| C | 6.1042042 | 2.3318530  | 16.9787477 |
| C | 5.4683095 | 3.2304077  | 17.8719234 |
| C | 5.9905679 | 3.3858158  | 19.1665070 |
| H | 5.4966326 | 4.0687265  | 19.8614534 |
| C | 7.1316071 | 2.7048038  | 19.5741077 |
| H | 7.5297277 | 2.8487760  | 20.5809728 |
| C | 7.7658917 | 1.8349992  | 18.6866008 |
| H | 8.6585777 | 1.3006013  | 19.0140791 |
| C | 7.2648508 | 1.6211489  | 17.3974451 |
| C | 4.2386175 | 4.0411006  | 17.4948073 |
| H | 4.0629357 | 3.9075672  | 16.4222267 |
| C | 2.9873828 | 3.5376845  | 18.2365808 |
| H | 2.0972182 | 4.1016040  | 17.9187914 |
| H | 3.0982276 | 3.6637878  | 19.3247523 |
| H | 2.8068900 | 2.4706268  | 18.0398489 |
| C | 4.4486800 | 5.5458992  | 17.7304210 |
| H | 5.3558552 | 5.9008697  | 17.2196675 |
| H | 4.5503869 | 5.7794377  | 18.8006835 |
| H | 3.5926553 | 6.1145064  | 17.3396996 |
| C | 7.9229186 | 0.5934136  | 16.4877077 |
| H | 7.8627783 | 0.9783360  | 15.4610618 |

|                                                |            |            |            |   |            |            |            |
|------------------------------------------------|------------|------------|------------|---|------------|------------|------------|
| C                                              | 9.4067981  | 0.3488367  | 16.7874464 | H | 2.7137505  | 1.1563473  | -2.6855756 |
| H                                              | 9.8399496  | -0.3036378 | 16.0152506 | C | -0.0831503 | 1.0262228  | -2.8913491 |
| H                                              | 9.5550808  | -0.1557889 | 17.7544976 | C | -0.5039091 | 2.3798444  | -2.9160640 |
| H                                              | 9.9793518  | 1.2877063  | 16.8000766 | C | -1.3355001 | 2.7906262  | -3.9659495 |
| C                                              | 7.1419750  | -0.7338967 | 16.5201522 | H | -1.6780820 | 3.8254846  | -4.0083794 |
| H                                              | 6.0917554  | -0.5829587 | 16.2359123 | C | -1.7338010 | 1.8978912  | -4.9629284 |
| H                                              | 7.1669582  | -1.1713216 | 17.5301998 | H | -2.3786928 | 2.2404988  | -5.7751215 |
| H                                              | 7.5844028  | -1.4615592 | 15.8215849 | C | -1.3210755 | 0.5688706  | -4.9132035 |
| C                                              | 6.2139503  | 4.2805028  | 14.4722143 | H | -1.6525998 | -0.1277221 | -5.6865009 |
| C                                              | 7.5342722  | 7.0320031  | 14.6957850 | C | -0.4994415 | 0.1041453  | -3.8748012 |
| H                                              | 8.4686351  | 7.6075074  | 14.6184465 | C | -0.0958602 | -1.3624101 | -3.8313731 |
| H                                              | 7.1207697  | 7.1870149  | 15.7033532 | H | 0.4269700  | -1.5327223 | -2.8798539 |
| H                                              | 6.8221237  | 7.4450038  | 13.9659298 | C | 0.8515241  | -1.7163561 | -4.9914033 |
| C                                              | 9.0289599  | 4.4626001  | 15.6753769 | H | 1.1798950  | -2.7642681 | -4.9158291 |
| H                                              | 9.2289489  | 3.3983867  | 15.4808430 | H | 1.7457859  | -1.0752182 | -4.9956086 |
| H                                              | 8.5923937  | 4.5419164  | 16.6810869 | H | 0.3484788  | -1.5910625 | -5.9629093 |
| H                                              | 9.9937907  | 4.9924781  | 15.6630132 | C | -1.3244757 | -2.2864916 | -3.8188344 |
| C                                              | 8.5934957  | 4.9377365  | 12.6363364 | H | -1.0068022 | -3.3353313 | -3.7153232 |
| H                                              | 7.9545486  | 5.4101050  | 11.8757244 | H | -1.9054373 | -2.2040236 | -4.7500465 |
| H                                              | 8.6583221  | 3.8671285  | 12.3905687 | H | -1.9801399 | -2.0415990 | -2.9726939 |
| H                                              | 9.6034722  | 5.3701414  | 12.5628288 | C | -0.0457817 | 3.3681429  | -1.8508059 |
|                                                |            |            |            | H | 0.0643173  | 2.7984702  | -0.9158123 |
| 84                                             |            |            |            | C | 1.3341839  | 3.9593623  | -2.1960427 |
| <b>TS<sub>1</sub></b> Energy = -1717.383847685 |            |            |            | H | 1.6730444  | 4.6364551  | -1.3962762 |
| Si                                             | -2.8447002 | 0.6083914  | 1.9135387  | H | 1.2868440  | 4.5343036  | -3.1337857 |
| N                                              | 1.5734483  | 0.0266411  | 0.1118929  | H | 2.0951588  | 3.1765647  | -2.3207653 |
| N                                              | 0.8182263  | 0.6129818  | -1.8585405 | C | -1.0512976 | 4.4948004  | -1.5816012 |
| N                                              | -0.7639979 | -0.9955185 | -0.6731172 | H | -0.7343755 | 5.0710691  | -0.6994957 |
| N                                              | -1.6481997 | -1.2739403 | 0.0931393  | H | -2.0564437 | 4.0983258  | -1.3827670 |
| C                                              | 0.4387839  | 0.2743140  | -0.5986001 | H | -1.1167601 | 5.1991578  | -2.4253824 |
| C                                              | 2.8070619  | 0.1922926  | -0.6973139 | C | 1.6641754  | -0.0347080 | 1.5410307  |
| H                                              | 3.3593876  | 1.0879463  | -0.3678898 | C | 1.8479942  | 1.1627062  | 2.2720954  |
| C                                              | 2.2518031  | 0.3371175  | -2.1192131 | C | 2.0024643  | 1.0690767  | 3.6622601  |

|   |            |            |            |                                         |            |            |            |
|---|------------|------------|------------|-----------------------------------------|------------|------------|------------|
| H | 2.1391691  | 1.9798715  | 4.2494824  | H                                       | -4.9532883 | 1.4420224  | 2.9900914  |
| C | 1.9728582  | -0.1664832 | 4.3076854  | H                                       | -4.8471558 | -0.3292762 | 3.1138469  |
| H | 2.0864118  | -0.2179051 | 5.3926292  | H                                       | -5.3312316 | 0.4254394  | 1.5742398  |
| C | 1.7929094  | -1.3354702 | 3.5692788  | C                                       | -1.7867888 | 0.8603746  | 3.4717093  |
| H | 1.7717640  | -2.2984662 | 4.0836734  | H                                       | -2.0013762 | 1.8314802  | 3.9460129  |
| C | 1.6461701  | -1.2954638 | 2.1753775  | H                                       | -0.7144905 | 0.8177390  | 3.2403419  |
| C | 1.5121678  | -2.5839255 | 1.3787967  | H                                       | -2.0021650 | 0.0669986  | 4.2031397  |
| H | 1.2287189  | -2.3041172 | 0.3534184  | H                                       | 2.3686924  | -0.5933898 | -2.6987203 |
| C | 0.4051533  | -3.4966522 | 1.9281268  | H                                       | 3.4662052  | -0.6802234 | -0.5852980 |
| H | 0.2647364  | -4.3615716 | 1.2627408  |                                         |            |            |            |
| H | -0.5502153 | -2.9584274 | 1.9984331  | 84                                      |            |            |            |
| H | 0.6581890  | -3.8848484 | 2.9271318  | <b>Comp 1'</b> Energy = -1717.475976580 |            |            |            |
| C | 2.8603487  | -3.3258405 | 1.3208395  | Si                                      | 4.7332026  | 0.2713837  | 12.7919705 |
| H | 2.7777485  | -4.2283745 | 0.6961310  | N                                       | 0.2181113  | -3.7113317 | 10.8368723 |
| H | 3.1806236  | -3.6382539 | 2.3271196  | N                                       | 0.9007946  | -3.5522838 | 12.9626901 |
| H | 3.6542163  | -2.6901207 | 0.9006611  | N                                       | 2.7759425  | -1.6098535 | 12.1268068 |
| C | 1.8942560  | 2.5277444  | 1.5991771  | N                                       | 1.9019894  | -2.1462502 | 11.2019242 |
| H | 1.7086280  | 2.3782326  | 0.5258971  | C                                       | 1.0920400  | -3.0580867 | 11.6865851 |
| C | 0.7920755  | 3.4656092  | 2.1183920  | H                                       | 3.3248314  | -0.2912054 | 10.6347139 |
| H | 0.8229604  | 4.4232213  | 1.5765547  | C                                       | -0.4200892 | -4.8416551 | 11.5165668 |
| H | 0.9203748  | 3.6819699  | 3.1898704  | H                                       | 0.1087468  | -5.7859283 | 11.2905585 |
| H | -0.2035802 | 3.0257358  | 1.9796437  | H                                       | -1.4693886 | -4.9482695 | 11.2077006 |
| C | 3.2804481  | 3.1790505  | 1.7517204  | C                                       | -0.2703986 | -4.4461144 | 12.9867988 |
| H | 3.3218625  | 4.1272867  | 1.1947017  | H                                       | -1.1583841 | -3.9032264 | 13.3566793 |
| H | 4.0798835  | 2.5237746  | 1.3751784  | H                                       | -0.0886467 | -5.3054834 | 13.6470922 |
| H | 3.5001989  | 3.3981953  | 2.8079931  | C                                       | 0.3763823  | -3.7050582 | 9.4128498  |
| C | -2.4860328 | -1.0382726 | 1.0649939  | C                                       | 1.4531333  | -4.3912655 | 8.8133114  |
| H | -3.1210739 | -1.8974578 | 1.3157852  | C                                       | 1.5424998  | -4.3733106 | 7.4132466  |
| C | -2.5866008 | 2.0253566  | 0.6801841  | H                                       | 2.3704210  | -4.8891787 | 6.9215391  |
| H | -2.7666574 | 3.0064366  | 1.1453555  | C                                       | 0.5938715  | -3.7052099 | 6.6407923  |
| H | -3.2666412 | 1.9161747  | -0.1777512 | H                                       | 0.6792513  | -3.7062174 | 5.5518796  |
| H | -1.5598751 | 1.9983509  | 0.2911028  | C                                       | -0.4641321 | -3.0313318 | 7.2546005  |
| C | -4.6688594 | 0.5277721  | 2.4464364  | H                                       | -1.1949026 | -2.5062654 | 6.6374317  |

|   |            |            |            |   |            |            |            |
|---|------------|------------|------------|---|------------|------------|------------|
| C | -0.5914918 | -3.0155082 | 8.6494454  | H | -2.5132180 | -0.5489178 | 13.9161209 |
| C | 2.5144146  | -5.1136401 | 9.6315266  | H | -1.7029681 | -0.4595613 | 15.4967540 |
| H | 2.2404736  | -5.0363692 | 10.6939987 | H | -2.0995724 | -2.0437355 | 14.7963278 |
| C | 3.8859441  | -4.4346835 | 9.4771349  | C | 0.0693981  | 0.3743240  | 13.4853868 |
| H | 4.2479479  | -4.5023791 | 8.4393405  | H | 1.0338793  | 0.3528311  | 12.9611026 |
| H | 4.6287388  | -4.9213107 | 10.1278630 | H | 0.1820705  | 0.9931056  | 14.3889845 |
| H | 3.8206998  | -3.3745768 | 9.7569436  | H | -0.6700773 | 0.8622915  | 12.8322757 |
| C | 2.5845786  | -6.6094310 | 9.2817598  | C | 2.9648422  | -4.8685063 | 14.4321454 |
| H | 2.8977545  | -6.7630931 | 8.2378753  | H | 2.3146862  | -5.2921705 | 13.6510091 |
| H | 1.6080806  | -7.0992658 | 9.4136131  | C | 4.2815255  | -4.4640031 | 13.7434791 |
| H | 3.3155361  | -7.1186207 | 9.9281144  | H | 4.7409565  | -5.3325204 | 13.2461468 |
| C | -1.6849068 | -2.2158613 | 9.3435928  | H | 4.9991195  | -4.0769210 | 14.4841569 |
| H | -1.8948383 | -2.7171499 | 10.3023392 | H | 4.1061946  | -3.6761923 | 12.9976404 |
| C | -1.1632165 | -0.8041825 | 9.6796623  | C | 3.1993518  | -5.9591287 | 15.4862885 |
| H | -0.9728752 | -0.2371792 | 8.7546714  | H | 2.2635901  | -6.2397775 | 15.9927837 |
| H | -0.2213835 | -0.8536987 | 10.2449091 | H | 3.9181230  | -5.6379632 | 16.2554528 |
| H | -1.9052889 | -0.2490637 | 10.2749322 | H | 3.6151011  | -6.8594532 | 15.0096976 |
| C | -2.9986767 | -2.1470480 | 8.5558940  | C | 3.4872286  | -0.6213602 | 11.6819722 |
| H | -2.8920963 | -1.5605561 | 7.6304348  | C | 4.1642795  | 2.0798633  | 12.9620683 |
| H | -3.7734156 | -1.6552644 | 9.1626957  | H | 4.8941030  | 2.6660239  | 13.5414622 |
| H | -3.3617015 | -3.1490867 | 8.2831161  | H | 3.1936780  | 2.1329643  | 13.4773553 |
| C | 1.3003084  | -2.9506329 | 14.2021246 | H | 4.0533056  | 2.5545394  | 11.9754192 |
| C | 0.6570991  | -1.7837726 | 14.6668797 | C | 4.8143998  | -0.5558304 | 14.4895406 |
| C | 1.0223359  | -1.2931817 | 15.9288022 | H | 5.1935321  | -1.5837923 | 14.4051786 |
| H | 0.5498311  | -0.3839659 | 16.3078530 | H | 3.8145503  | -0.6114535 | 14.9420586 |
| C | 1.9721912  | -1.9499429 | 16.7101974 | H | 5.4776472  | 0.0069969  | 15.1638972 |
| H | 2.2401745  | -1.5532891 | 17.6917891 | C | 6.4327734  | 0.2366980  | 11.9382450 |
| C | 2.5846378  | -3.1119154 | 16.2372748 | H | 6.3781728  | 0.6821708  | 10.9334340 |
| H | 3.3313822  | -3.6138907 | 16.8549538 | H | 6.7944543  | -0.7969987 | 11.8333208 |
| C | 2.2591097  | -3.6363513 | 14.9808240 | H | 7.1753757  | 0.8031291  | 12.5211286 |
| C | -0.3912624 | -1.0492336 | 13.8428100 |   |            |            |            |
| H | -0.5229620 | -1.5897623 | 12.8938172 |   |            |            |            |
| C | -1.7550617 | -1.0268909 | 14.5551063 |   |            |            |            |

87

TS 3 Energy = -1756.674471630

|    |            |            |            |   |            |            |            |
|----|------------|------------|------------|---|------------|------------|------------|
| Si | -4.1061190 | -0.0656236 | 1.7308066  | H | -0.6629390 | -2.6711709 | -2.7677457 |
| N  | 1.3831558  | 0.2584845  | 0.3836766  | C | -1.0587967 | 3.0406934  | -1.8212691 |
| N  | 0.8156743  | 0.7900356  | -1.7817977 | H | -0.4052180 | 2.7094715  | -1.0007629 |
| N  | -1.1308899 | -1.2945347 | -0.6599539 | C | -0.4662038 | 4.3359872  | -2.4069045 |
| N  | -2.0325281 | -0.9043783 | -0.0112317 | H | -0.4040703 | 5.1173830  | -1.6337371 |
| C  | 0.4593931  | 0.3041225  | -0.5866400 | H | -1.0950718 | 4.7188087  | -3.2258178 |
| C  | 2.7851554  | 0.7155985  | 0.2261396  | H | 0.5439323  | 4.1710374  | -2.8106637 |
| H  | 3.4201379  | 0.0996505  | 0.8772552  | C | -2.4489828 | 3.2941027  | -1.2165919 |
| H  | 2.8707196  | 1.7602270  | 0.5713899  | H | -2.3770367 | 4.0211105  | -0.3926971 |
| C  | 3.2012999  | 0.5970047  | -1.2338968 | H | -2.8787226 | 2.3648719  | -0.8166934 |
| H  | 3.2730166  | -0.4660232 | -1.5137360 | H | -3.1470253 | 3.7063754  | -1.9612944 |
| H  | 4.1921407  | 1.0482303  | -1.3828198 | C | 1.0162262  | -0.3045553 | 1.6637491  |
| C  | 2.1704336  | 1.2909060  | -2.1153789 | C | 0.5948946  | 0.5575126  | 2.6985850  |
| H  | 2.2008085  | 2.3851182  | -1.9738407 | C | 0.2733079  | -0.0113939 | 3.9389708  |
| H  | 2.3551684  | 1.0907566  | -3.1796287 | H | -0.0590185 | 0.6324153  | 4.7558190  |
| C  | -0.1752884 | 0.8520909  | -2.8303904 | C | 0.3586986  | -1.3874548 | 4.1409624  |
| C  | -1.0773216 | 1.9352886  | -2.8664952 | H | 0.0944539  | -1.8137831 | 5.1110904  |
| C  | -1.9962166 | 1.9849199  | -3.9251813 | C | 0.7737457  | -2.2213676 | 3.1031698  |
| H  | -2.7076932 | 2.8119405  | -3.9791909 | H | 0.8333793  | -3.2985128 | 3.2716817  |
| C  | -2.0174516 | 0.9974710  | -4.9087696 | C | 1.1144958  | -1.7016070 | 1.8463744  |
| H  | -2.7414607 | 1.0548344  | -5.7245391 | C | 1.6060028  | -2.6288321 | 0.7423961  |
| C  | -1.1215736 | -0.0693303 | -4.8452795 | H | 1.5596884  | -2.0689629 | -0.2018808 |
| H  | -1.1566338 | -0.8476103 | -5.6114748 | C | 0.7165885  | -3.8677495 | 0.5663348  |
| C  | -0.1853379 | -0.1659986 | -3.8073898 | H | 1.0542651  | -4.4504452 | -0.3045178 |
| C  | 0.7662720  | -1.3520673 | -3.7486432 | H | -0.3259187 | -3.5702479 | 0.3939199  |
| H  | 1.3639647  | -1.2522279 | -2.8308176 | H | 0.7579106  | -4.5311175 | 1.4436931  |
| C  | 1.7305579  | -1.3619672 | -4.9475283 | C | 3.0704385  | -3.0395821 | 0.9883847  |
| H  | 2.4483087  | -2.1915212 | -4.8565298 | H | 3.4394269  | -3.6649468 | 0.1607805  |
| H  | 2.3003083  | -0.4229232 | -5.0207311 | H | 3.1623643  | -3.6201142 | 1.9193532  |
| H  | 1.1840030  | -1.4932472 | -5.8940450 | H | 3.7326075  | -2.1650937 | 1.0757286  |
| C  | 0.0042304  | -2.6837195 | -3.6396133 | C | 0.5214973  | 2.0666492  | 2.5079877  |
| H  | 0.7133466  | -3.5181445 | -3.5248847 | H | 0.5865762  | 2.2652889  | 1.4270604  |
| H  | -0.5966268 | -2.8760934 | -4.5419523 | C | -0.8022698 | 2.6695641  | 3.0043429  |

|               |                          |            |            |   |            |            |            |
|---------------|--------------------------|------------|------------|---|------------|------------|------------|
| H             | -0.8525475               | 3.7381756  | 2.7463429  | C | 3.0739660  | 1.3806865  | -1.3469038 |
| H             | -0.9007780               | 2.5893823  | 4.0976742  | H | 3.5874196  | 0.4535663  | -1.0482884 |
| H             | -1.6658648               | 2.1656399  | 2.5503769  | H | 3.8373557  | 2.0916410  | -1.6939740 |
| C             | 1.7142385                | 2.7582923  | 3.1958315  | C | 2.0768600  | 1.1158647  | -2.4642404 |
| H             | 1.7017500                | 3.8415182  | 2.9994557  | H | 1.8071809  | 2.0655578  | -2.9622164 |
| H             | 2.6758485                | 2.3553183  | 2.8461884  | H | 2.5091796  | 0.4601719  | -3.2386058 |
| H             | 1.6696573                | 2.6102895  | 4.2861482  | C | -0.1410543 | 0.1646348  | -2.9380580 |
| C             | -2.5607442               | 0.0573434  | 0.7004870  | C | -1.1564999 | 1.1037692  | -3.2220853 |
| H             | -1.8482197               | 0.9051509  | 0.7464021  | C | -2.0805610 | 0.7892197  | -4.2282890 |
| C             | -5.2624326               | -1.3716389 | 0.9814090  | H | -2.8826430 | 1.4926647  | -4.4621806 |
| H             | -6.1641495               | -1.4976555 | 1.5996164  | C | -1.9910340 | -0.4105444 | -4.9357971 |
| H             | -4.7560373               | -2.3464011 | 0.9149789  | H | -2.7177258 | -0.6365524 | -5.7192185 |
| H             | -5.5750634               | -1.0812371 | -0.0323583 | C | -0.9786859 | -1.3241522 | -4.6392184 |
| C             | -3.7002398               | -0.5460959 | 3.5305566  | H | -0.9279908 | -2.2678283 | -5.1871081 |
| H             | -4.6106908               | -0.6116775 | 4.1469702  | C | -0.0386672 | -1.0567395 | -3.6341563 |
| H             | -3.0271313               | 0.1966315  | 3.9849888  | C | 1.0089986  | -2.0958706 | -3.2629748 |
| H             | -3.1844032               | -1.5175963 | 3.5608952  | H | 1.6826632  | -1.6352613 | -2.5240543 |
| C             | -4.9384137               | 1.6456711  | 1.7504376  | C | 1.8542599  | -2.5330013 | -4.4688736 |
| H             | -5.8142040               | 1.6541929  | 2.4172614  | H | 2.6406584  | -3.2346900 | -4.1517978 |
| H             | -5.2667779               | 1.9328311  | 0.7408262  | H | 2.3369365  | -1.6721685 | -4.9556392 |
| H             | -4.2369138               | 2.4159759  | 2.1071586  | H | 1.2408173  | -3.0452599 | -5.2259689 |
|               |                          |            |            | C | 0.3446511  | -3.2994642 | -2.5704858 |
| 87            |                          |            |            | H | 1.1075464  | -4.0185132 | -2.2334168 |
| <b>Comp 3</b> | Energy = -1756.750083722 |            |            | H | -0.3360419 | -3.8242651 | -3.2591651 |
| Si            | -2.8318637               | -1.5665896 | 2.7079481  | H | -0.2301353 | -2.9584809 | -1.6982089 |
| N             | 1.3195823                | 0.9529281  | 0.3086678  | C | -1.2903430 | 2.3953707  | -2.4278457 |
| N             | 0.8522977                | 0.4961475  | -1.9495620 | H | -0.3655915 | 2.5199876  | -1.8438461 |
| N             | -0.4545386               | -0.5449677 | -0.3996287 | C | -1.4339303 | 3.6324672  | -3.3274857 |
| N             | -1.0167172               | -0.5067043 | 0.8511794  | H | -1.4440627 | 4.5477575  | -2.7163300 |
| C             | 0.5499186                | 0.2903570  | -0.6189909 | H | -2.3725171 | 3.6102890  | -3.9017152 |
| C             | 2.3093553                | 1.9413067  | -0.1559489 | H | -0.6018564 | 3.7073237  | -4.0438719 |
| H             | 2.9743780                | 2.1545967  | 0.6892808  | C | -2.4521656 | 2.2966633  | -1.4215048 |
| H             | 1.8085657                | 2.8868189  | -0.4352925 | H | -2.4972856 | 3.2014967  | -0.7953304 |



|   |            |            |            |                                       |            |            |            |
|---|------------|------------|------------|---------------------------------------|------------|------------|------------|
| H | -2.3296188 | 1.4263148  | -0.7625382 | C                                     | -4.2722008 | -0.3209187 | 2.6984175  |
| H | -3.4145168 | 2.1986185  | -1.9476908 | H                                     | -4.8580690 | -0.3946343 | 3.6278401  |
| C | 1.3901142  | 0.5980867  | 1.7025102  | H                                     | -4.9463860 | -0.5108025 | 1.8501247  |
| C | 0.9158655  | 1.5361265  | 2.6456758  | H                                     | -3.8970247 | 0.7090854  | 2.6096080  |
| C | 1.1398224  | 1.2822483  | 4.0036259  | C                                     | -3.5414176 | -3.3271537 | 2.8101479  |
| H | 0.7794955  | 1.9941685  | 4.7502499  | H                                     | -4.1439008 | -3.4555242 | 3.7219928  |
| C | 1.7930840  | 0.1207278  | 4.4187918  | H                                     | -2.7356507 | -4.0767917 | 2.8262698  |
| H | 1.9530362  | -0.0668371 | 5.4826814  | H                                     | -4.1873658 | -3.5416319 | 1.9450382  |
| C | 2.2227418  | -0.8086672 | 3.4733282  | C                                     | -1.6926947 | -1.2241826 | 4.1817533  |
| H | 2.7209959  | -1.7219709 | 3.8066517  | H                                     | -2.2525342 | -1.2543146 | 5.1290179  |
| C | 2.0451533  | -0.5870619 | 2.0995530  | H                                     | -1.2203338 | -0.2376407 | 4.0816624  |
| C | 2.5499541  | -1.6176564 | 1.1005727  | H                                     | -0.8842049 | -1.9684964 | 4.2283845  |
| H | 2.3093340  | -1.2575796 | 0.0908295  |                                       |            |            |            |
| C | 1.8296502  | -2.9650060 | 1.2756590  | 87                                    |            |            |            |
| H | 2.1548598  | -3.6764711 | 0.5012914  | <b>TS 3'</b> Energy = -1756.680423758 |            |            |            |
| H | 0.7419055  | -2.8374701 | 1.1923295  | Si                                    | -3.2058507 | -1.0181221 | 0.8910823  |
| H | 2.0508751  | -3.4110705 | 2.2579899  | N                                     | 1.6268231  | -0.2104388 | 0.4452614  |
| C | 4.0771333  | -1.7811999 | 1.1805382  | N                                     | 0.5998300  | 0.2434848  | -1.5909764 |
| H | 4.4294949  | -2.4862479 | 0.4120052  | N                                     | -0.8640753 | -3.8228320 | -0.5263451 |
| H | 4.3871937  | -2.1719410 | 2.1617311  | N                                     | -1.2591161 | -2.7915208 | -0.1411460 |
| H | 4.5909068  | -0.8199646 | 1.0280570  | C                                     | 0.5114369  | 0.0101871  | -0.2702444 |
| C | 0.1147143  | 2.7556195  | 2.2145404  | C                                     | 2.9794914  | -0.2669400 | -0.1480084 |
| H | 0.0855301  | 2.7571537  | 1.1151502  | H                                     | 3.5691288  | -0.9919081 | 0.4284479  |
| C | -1.3418944 | 2.6325258  | 2.6906362  | H                                     | 3.4688368  | 0.7164287  | -0.0411815 |
| H | -1.9429921 | 3.4762735  | 2.3177110  | C                                     | 2.8767234  | -0.6664202 | -1.6122206 |
| H | -1.4066373 | 2.6283601  | 3.7899287  | H                                     | 2.5340051  | -1.7099975 | -1.6916414 |
| H | -1.7764957 | 1.6977365  | 2.3111966  | H                                     | 3.8629402  | -0.5982713 | -2.0912595 |
| C | 0.7546630  | 4.0733817  | 2.6766405  | C                                     | 1.8906776  | 0.2545300  | -2.3154313 |
| H | 0.1738413  | 4.9328281  | 2.3081825  | H                                     | 2.2810484  | 1.2851019  | -2.3581417 |
| H | 1.7861685  | 4.1720378  | 2.3057591  | H                                     | 1.7059962  | -0.0660662 | -3.3469068 |
| H | 0.7865522  | 4.1395976  | 3.7750471  | C                                     | -0.5810144 | 0.6082278  | -2.3508433 |
| C | -1.8690924 | -1.4608266 | 1.0819772  | C                                     | -1.1885298 | 1.8703266  | -2.1345905 |
| H | -2.0363540 | -2.2106239 | 0.2812708  | C                                     | -2.2507398 | 2.2387611  | -2.9716095 |

|   |            |            |            |   |            |            |            |
|---|------------|------------|------------|---|------------|------------|------------|
| H | -2.7377934 | 3.2033975  | -2.8251485 | H | 1.5472326  | -2.3863836 | 4.5296753  |
| C | -2.6973243 | 1.4017443  | -3.9922615 | C | 1.5493092  | -1.4710870 | 2.5777112  |
| H | -3.5204617 | 1.7160841  | -4.6373858 | C | 1.5250423  | -2.8134745 | 1.8636807  |
| C | -2.1077565 | 0.1547052  | -4.1668665 | H | 1.2709154  | -2.6345209 | 0.8089557  |
| H | -2.4840481 | -0.5139294 | -4.9434427 | C | 0.4521312  | -3.7498020 | 2.4419304  |
| C | -1.0553262 | -0.2758730 | -3.3460295 | H | 0.3616563  | -4.6459418 | 1.8140312  |
| C | -0.5210883 | -1.6889423 | -3.5320122 | H | -0.5263419 | -3.2501473 | 2.4633544  |
| H | 0.1587812  | -1.9105672 | -2.6956239 | H | 0.7052823  | -4.0718674 | 3.4635241  |
| C | 0.2518883  | -1.8505346 | -4.8547524 | C | 2.9070442  | -3.4936520 | 1.9150521  |
| H | 0.6522005  | -2.8718050 | -4.9390088 | H | 2.8846589  | -4.4405153 | 1.3553675  |
| H | 1.0932900  | -1.1473933 | -4.9444046 | H | 3.1904456  | -3.7191267 | 2.9549704  |
| H | -0.4132671 | -1.6770388 | -5.7145601 | H | 3.6990580  | -2.8625824 | 1.4853247  |
| C | -1.6673829 | -2.7152407 | -3.4717249 | C | 1.7085889  | 2.3407367  | 1.8823803  |
| H | -1.2611692 | -3.7341173 | -3.4143829 | H | 1.5772948  | 2.1697924  | 0.8044482  |
| H | -2.3039440 | -2.6484039 | -4.3669737 | C | 0.5907993  | 3.2919342  | 2.3386169  |
| H | -2.2948714 | -2.5522420 | -2.5866591 | H | 0.6250322  | 4.2276172  | 1.7610426  |
| C | -0.7102652 | 2.8367317  | -1.0584595 | H | 0.6982386  | 3.5566683  | 3.4009603  |
| H | -0.3401922 | 2.2282559  | -0.2193173 | H | -2.1648594 | 0.3277341  | 2.7347385  |
| C | 0.4566954  | 3.7015249  | -1.5701282 | C | 3.0916843  | 2.9864155  | 2.0841995  |
| H | 0.8180772  | 4.3728548  | -0.7763757 | H | 3.1633593  | 3.9267455  | 1.5167147  |
| H | 0.1325081  | 4.3220194  | -2.4197532 | H | 3.9008761  | 2.3202323  | 1.7506280  |
| H | 1.3045946  | 3.0899132  | -1.9076170 | H | 3.2672169  | 3.2173588  | 3.1461366  |
| C | -1.8281075 | 3.7310552  | -0.5064312 | C | -1.5801855 | -1.6353447 | 0.2703150  |
| H | -1.4646643 | 4.2828915  | 0.3714819  | H | -0.5997689 | -0.6221933 | 0.1152415  |
| H | -2.7044472 | 3.1425465  | -0.1994895 | C | -4.0605157 | -2.2961358 | 2.0132213  |
| H | -2.1585267 | 4.4775812  | -1.2442550 | H | -5.0350768 | -1.9260468 | 2.3680620  |
| C | 1.5674692  | -0.2346568 | 1.8944422  | H | -3.4343699 | -2.5190854 | 2.8900065  |
| C | 1.6241084  | 0.9953594  | 2.5886742  | H | -4.2305945 | -3.2385013 | 1.4703582  |
| C | 1.6367474  | 0.9647481  | 3.9903097  | C | -2.8141082 | 0.5601092  | 1.8775297  |
| H | 1.6776153  | 1.9036863  | 4.5458747  | H | -3.7288231 | 1.0459802  | 2.2496378  |
| C | 1.6111574  | -0.2427053 | 4.6835504  | H | -2.2791658 | 1.2808823  | 1.2417140  |
| H | 1.6240415  | -0.2479376 | 5.7755065  | H | -0.3999829 | 2.8353010  | 2.2054525  |
| C | 1.5681049  | -1.4440704 | 3.9799921  | C | -4.3714909 | -0.5720193 | -0.5497296 |

H -5.3127935 -0.1278715 -0.1887780  
H -4.6180605 -1.4693034 -1.1378783  
H -3.8809693 0.1450104 -1.2255527

87

**Comp 3'** Energy = -1756.717937642

Si -3.3543099 -0.4403207 1.9124712  
N 0.4548387 0.2124537 0.9201064  
N -0.6161144 0.1545175 -1.2129012  
N -1.7677008 -3.1132522 0.2006499  
N -1.7513270 -1.9869498 0.4265472  
C -0.8701614 0.2700934 0.2295319  
C 1.3638347 1.2734627 0.4776102  
H 2.3082812 1.1652289 1.0291759  
H 0.9679470 2.2893173 0.7032653  
C 1.5928587 1.1899346 -1.0289390  
H 2.1221346 0.2583304 -1.2803361  
H 2.2095880 2.0425538 -1.3568204  
C 0.2371528 1.2196034 -1.7297280  
H -0.2286634 2.2191186 -1.5629229  
H 0.3396255 1.0900624 -2.8151575  
C -1.4733361 -0.5222098 -2.1421083  
C -2.7430964 -0.0107714 -2.5156548  
C -3.5098438 -0.7201647 -3.4512103  
H -4.4920599 -0.3417269 -3.7406122  
C -3.0311365 -1.8898286 -4.0407078  
H -3.6428402 -2.4252926 -4.7703100  
C -1.7645151 -2.3630534 -3.7065801  
H -1.3870489 -3.2702152 -4.1831315  
C -0.9698163 -1.6983353 -2.7621972  
C 0.4292318 -2.2135917 -2.4579883  
H 0.7394043 -1.7263375 -1.5218610  
C 1.4189221 -1.7807382 -3.5564459

H 2.4414365 -2.1011239 -3.3021334  
H 1.4280133 -0.6899258 -3.6917036  
H 1.1507220 -2.2354465 -4.5232875  
C 0.4936994 -3.7347366 -2.2598231  
H 1.5016038 -4.0267330 -1.9276066  
H 0.2887724 -4.2787970 -3.1949059  
H -0.2274740 -4.0734004 -1.5037574  
C -3.2411532 1.3369586 -2.0106941  
H -2.7094271 1.5623821 -1.0742650  
C -2.8928017 2.4445620 -3.0266515  
H -3.1864395 3.4320461 -2.6380595  
H -3.4298122 2.2769801 -3.9733723  
H -1.8182324 2.4685683 -3.2511602  
C -4.7482565 1.3651927 -1.7180705  
H -5.0257234 2.3188301 -1.2439974  
H -5.0503993 0.5468899 -1.0504794  
H -5.3409275 1.2814332 -2.6409460  
C 0.5621961 -0.1843529 2.2999222  
C 0.3274524 0.6960506 3.3889417  
C 0.5489995 0.2318386 4.6963303  
H 0.3763533 0.9047011 5.5388109  
C 0.9754700 -1.0695867 4.9422957  
H 1.1282252 -1.4135009 5.9676904  
C 1.2142725 -1.9283145 3.8704815  
H 1.5660028 -2.9428279 4.0661671  
C 1.0357211 -1.5026826 2.5481041  
C 1.4344129 -2.4164139 1.3984748  
H 0.8344460 -2.1185844 0.5296973  
C 1.1923895 -3.9055024 1.6705594  
H 1.3750351 -4.4852194 0.7540636  
H 0.1569216 -4.0947037 1.9855812  
H 1.8686563 -4.2999990 2.4453671  
C 2.9062750 -2.1686691 1.0172768

|                                      |            |            |            |   |            |            |            |
|--------------------------------------|------------|------------|------------|---|------------|------------|------------|
| H                                    | 3.1900950  | -2.7901422 | 0.1532125  | N | -0.9797584 | -1.1889081 | -0.6501081 |
| H                                    | 3.5749543  | -2.4203958 | 1.8553888  | N | -1.7068493 | -1.0223049 | 0.2712671  |
| H                                    | 3.0757586  | -1.1161124 | 0.7495529  | C | 0.4741889  | 0.3700262  | -0.5889940 |
| C                                    | -0.1159265 | 2.1450962  | 3.2111970  | C | 2.7281180  | 0.7530860  | -0.4829785 |
| H                                    | -0.4899861 | 2.2593690  | 2.1826573  | H | 3.6972155  | 0.8342541  | -0.0038666 |
| C                                    | -1.2522738 | 2.5505586  | 4.1668370  | C | 2.3384639  | 0.9721371  | -1.7702010 |
| H                                    | -1.6432440 | 3.5409919  | 3.8890864  | H | 2.8973566  | 1.2832890  | -2.6454230 |
| H                                    | -0.8972472 | 2.6199122  | 5.2056904  | C | 0.1500960  | 0.7995997  | -2.9939299 |
| H                                    | -2.9343262 | 2.0497390  | 2.0026346  | C | -0.7316054 | 1.8895262  | -3.1382139 |
| C                                    | 1.0719092  | 3.1096343  | 3.4014652  | C | -1.5164605 | 1.9321648  | -4.2994335 |
| H                                    | 0.7619256  | 4.1491008  | 3.2122524  | H | -2.2169437 | 2.7571649  | -4.4426401 |
| H                                    | 1.9076069  | 2.8720532  | 2.7302295  | C | -1.4214027 | 0.9364460  | -5.2712833 |
| H                                    | 1.4456200  | 3.0505452  | 4.4354635  | H | -2.0411241 | 0.9905758  | -6.1688838 |
| C                                    | -1.8706600 | -0.7321193 | 0.7473387  | C | -0.5457122 | -0.1337802 | -5.0944688 |
| H                                    | -1.3121522 | 1.2785156  | 0.4356744  | H | -0.4933643 | -0.9186481 | -5.8521015 |
| C                                    | -2.9256775 | -1.0386488 | 3.6578884  | C | 0.2527517  | -0.2329136 | -3.9465513 |
| H                                    | -3.7769904 | -0.8838448 | 4.3388359  | C | 1.1456304  | -1.4485533 | -3.7418497 |
| H                                    | -2.0451104 | -0.5254494 | 4.0651825  | H | 1.6780628  | -1.3252567 | -2.7878868 |
| H                                    | -2.7004119 | -2.1157019 | 3.6347834  | C | 2.2042730  | -1.5690563 | -4.8505146 |
| C                                    | -3.8076788 | 1.3981087  | 1.8735150  | H | 2.8659763  | -2.4260026 | -4.6550508 |
| H                                    | -4.5120297 | 1.6126752  | 2.6915112  | H | 2.8251110  | -0.6626572 | -4.9137196 |
| H                                    | -4.2950858 | 1.6592722  | 0.9257167  | H | 1.7371791  | -1.7247810 | -5.8350454 |
| H                                    | -2.0858330 | 1.8367893  | 4.1459864  | C | 0.3043117  | -2.7311698 | -3.6218954 |
| C                                    | -4.7920252 | -1.4964575 | 1.2676917  | H | 0.9566696  | -3.5938170 | -3.4172020 |
| H                                    | -5.6942968 | -1.3098208 | 1.8696163  | H | -0.2456673 | -2.9378577 | -4.5529908 |
| H                                    | -4.5607516 | -2.5696718 | 1.3397725  | H | -0.4193069 | -2.6387893 | -2.8006019 |
| H                                    | -5.0218960 | -1.2706250 | 0.2169996  | C | -0.8825631 | 2.9609738  | -2.0685967 |
|                                      |            |            |            | H | -0.0501352 | 2.8477273  | -1.3581873 |
| 82                                   |            |            |            | C | -0.8065452 | 4.3837579  | -2.6438363 |
| <b>TS 4</b> Energy = -1716.189826684 |            |            |            | H | -0.8413359 | 5.1209211  | -1.8272919 |
| Si                                   | -3.2732813 | -0.5888037 | 2.6068614  | H | -1.6512338 | 4.5985291  | -3.3153951 |
| N                                    | 1.5781502  | 0.3797626  | 0.2149558  | H | 0.1241824  | 4.5401090  | -3.2085334 |
| N                                    | 0.9656434  | 0.7221053  | -1.8098800 | C | -2.1876637 | 2.7453531  | -1.2795082 |

|   |            |            |            |                                        |            |            |            |
|---|------------|------------|------------|----------------------------------------|------------|------------|------------|
| H | -2.2758382 | 3.4898379  | -0.4728236 | H                                      | -1.3601952 | 0.6450324  | 1.2700410  |
| H | -2.2151671 | 1.7454179  | -0.8253403 | C                                      | -3.6077108 | -2.4567431 | 2.6751450  |
| H | -3.0636790 | 2.8519062  | -1.9381561 | H                                      | -4.3922714 | -2.6981012 | 3.4079245  |
| C | 1.5395702  | 0.0924808  | 1.6275793  | H                                      | -2.6922005 | -2.9987415 | 2.9561765  |
| C | 1.3743034  | 1.1656612  | 2.5255686  | H                                      | -3.9325759 | -2.8272982 | 1.6912850  |
| C | 1.3636337  | 0.8673080  | 3.8950700  | C                                      | -2.5300207 | 0.0342335  | 4.2425585  |
| H | 1.2358410  | 1.6741323  | 4.6195415  | H                                      | -3.2264309 | -0.1081003 | 5.0827432  |
| C | 1.4968806  | -0.4456403 | 4.3450378  | H                                      | -2.2951885 | 1.1078761  | 4.1740508  |
| H | 1.4818501  | -0.6579677 | 5.4162328  | H                                      | -1.5920336 | -0.4953262 | 4.4646365  |
| C | 1.6332043  | -1.4896149 | 3.4310388  | C                                      | -4.8993952 | 0.3519452  | 2.2916294  |
| H | 1.7199406  | -2.5151706 | 3.7949957  | H                                      | -5.6241676 | 0.1980924  | 3.1063259  |
| C | 1.6514796  | -1.2461206 | 2.0501900  | H                                      | -5.3616146 | 0.0225761  | 1.3489700  |
| C | 1.8005588  | -2.3971316 | 1.0669279  | H                                      | -4.7022094 | 1.4320322  | 2.2080462  |
| H | 1.5660720  | -2.0141442 | 0.0634719  |                                        |            |            |            |
| C | 0.8031466  | -3.5304670 | 1.3511233  | 82                                     |            |            |            |
| H | 0.8659288  | -4.2921245 | 0.5595837  | <b>Comp 4</b> Energy = -1716.264366216 |            |            |            |
| H | -0.2264428 | -3.1486056 | 1.3762965  | Si                                     | -1.3962715 | 2.6935453  | 9.5628605  |
| H | 1.0124654  | -4.0300015 | 2.3095413  | N                                      | 1.0070017  | 7.4040382  | 8.4632693  |
| C | 3.2489573  | -2.9179974 | 1.0542911  | N                                      | 1.7332678  | 8.1346103  | 10.4108886 |
| H | 3.3612417  | -3.7240600 | 0.3131187  | N                                      | 0.6461498  | 6.0457461  | 10.5230788 |
| H | 3.5303159  | -3.3209525 | 2.0396784  | N                                      | -0.0808756 | 5.1284789  | 9.8051948  |
| H | 3.9612217  | -2.1186301 | 0.8010038  | C                                      | 1.0597627  | 7.0794921  | 9.8147092  |
| C | 1.2084616  | 2.6027810  | 2.0524974  | C                                      | 2.0866458  | 9.0847262  | 9.4517836  |
| H | 1.1099376  | 2.5880755  | 0.9570350  | H                                      | 2.6190393  | 9.9876382  | 9.7241829  |
| C | -0.0707436 | 3.2470799  | 2.6121727  | C                                      | 1.6417211  | 8.6352658  | 8.2524688  |
| H | -0.1948228 | 4.2608558  | 2.2024965  | H                                      | 1.7120582  | 9.0617521  | 7.2590179  |
| H | -0.0363111 | 3.3319973  | 3.7086516  | C                                      | 0.4400529  | 6.6203973  | 7.4001434  |
| H | -0.9609677 | 2.6601099  | 2.3458019  | C                                      | 1.2466788  | 5.6497439  | 6.7758820  |
| C | 2.4504912  | 3.4426401  | 2.3984162  | C                                      | 0.6721896  | 4.9027327  | 5.7387350  |
| H | 2.3400718  | 4.4693452  | 2.0178897  | H                                      | 1.2626549  | 4.1294086  | 5.2421924  |
| H | 3.3605105  | 3.0092296  | 1.9582453  | C                                      | -0.6432463 | 5.1301797  | 5.3335002  |
| H | 2.5976382  | 3.4984405  | 3.4880550  | H                                      | -1.0759742 | 4.5327933  | 4.5281714  |
| C | -2.0199649 | -0.2474040 | 1.2747476  | C                                      | -1.4073158 | 6.1226478  | 5.9498921  |

|   |            |           |            |   |            |            |            |
|---|------------|-----------|------------|---|------------|------------|------------|
| H | -2.4340745 | 6.2936274 | 5.6197999  | C | -0.3684920 | 9.2248260  | 12.0799991 |
| C | -0.8805092 | 6.8947341 | 6.9931336  | H | -0.2877462 | 9.2283850  | 10.9824920 |
| C | -1.7306165 | 7.9424564 | 7.6973460  | C | -1.4638020 | 8.2097534  | 12.4556632 |
| H | -1.0616116 | 8.5411187 | 8.3333724  | H | -2.4217582 | 8.4901438  | 11.9909265 |
| C | -2.7613858 | 7.2742701 | 8.6241947  | H | -1.6102535 | 8.1781735  | 13.5464562 |
| H | -3.3090734 | 8.0360660 | 9.2001718  | H | -1.1899387 | 7.2019769  | 12.1120259 |
| H | -2.2687834 | 6.5871907 | 9.3261626  | C | -0.7472648 | 10.6492692 | 12.5140876 |
| H | -3.4936050 | 6.6942152 | 8.0418744  | H | -1.6849980 | 10.9560201 | 12.0267780 |
| C | -2.4057991 | 8.9077382 | 6.7115959  | H | 0.0343974  | 11.3732722 | 12.2402837 |
| H | -2.9457747 | 9.6936057 | 7.2607226  | H | -0.9038667 | 10.7142494 | 13.6014398 |
| H | -3.1373845 | 8.3895929 | 6.0730657  | C | -0.4050320 | 4.0453564  | 10.4460135 |
| H | -1.6680205 | 9.3927795 | 6.0550870  | H | -0.0698100 | 3.9320095  | 11.4974217 |
| C | 2.6794266  | 5.3892400 | 7.2170395  | C | -2.8333192 | 3.4563936  | 8.5881369  |
| H | 2.9220729  | 6.1089283 | 8.0133037  | H | -3.3874756 | 2.6791102  | 8.0396861  |
| C | 1.9793459  | 8.2348740 | 11.8212033 | H | -2.4436930 | 4.1847231  | 7.8625040  |
| C | 0.9753625  | 8.7847322 | 12.6419493 | H | -3.5345780 | 3.9798886  | 9.2540645  |
| C | 1.2386979  | 8.8704638 | 14.0166179 | C | -0.2804156 | 1.7472687  | 8.3469428  |
| H | 0.4809393  | 9.2847341 | 14.6847199 | H | -0.8350473 | 0.9234403  | 7.8716047  |
| C | 2.4515174  | 8.4265622 | 14.5429829 | H | 0.6004716  | 1.3248035  | 8.8525256  |
| H | 2.6378628  | 8.5013082 | 15.6165277 | H | 0.0721028  | 2.4295280  | 7.5596139  |
| C | 3.4279724  | 7.8846858 | 13.7057396 | C | -2.0403855 | 1.5044849  | 10.8979797 |
| H | 4.3690083  | 7.5355367 | 14.1342976 | H | -2.6120943 | 0.6784993  | 10.4484942 |
| C | 3.2126206  | 7.7733951 | 12.3252836 | H | -2.6987924 | 2.0277712  | 11.6079349 |
| C | 4.2393937  | 7.1113853 | 11.4177233 | H | -1.2067124 | 1.0673880  | 11.4686951 |
| H | 4.0288413  | 7.4337031 | 10.3861728 | C | 2.8364787  | 3.9809317  | 7.8141359  |
| C | 5.6835266  | 7.5225095 | 11.7379647 | H | 2.6370678  | 3.2041130  | 7.0603382  |
| H | 6.3689632  | 7.0932063 | 10.9922394 | H | 3.8627382  | 3.8370238  | 8.1855591  |
| H | 6.0039135  | 7.1553004 | 12.7245104 | H | 2.1397079  | 3.8297331  | 8.6493728  |
| H | 5.8045693  | 8.6158871 | 11.7260170 | C | 3.6729784  | 5.6262859  | 6.0677015  |
| C | 4.0702963  | 5.5796825 | 11.4631762 | H | 3.5822525  | 6.6461058  | 5.6650927  |
| H | 4.7531842  | 5.0964215 | 10.7474798 | H | 4.7061661  | 5.4866202  | 6.4204871  |
| H | 3.0383721  | 5.2922778 | 11.2150296 | H | 3.5034888  | 4.9203890  | 5.2401587  |
| H | 4.3013446  | 5.1964581 | 12.4695475 |   |            |            |            |

|                                       |            |            |            |           |            |            |            |
|---------------------------------------|------------|------------|------------|-----------|------------|------------|------------|
| 82                                    |            |            | H          | 2.1442505 | -3.7268980 | -3.0833857 |            |
| <b>TS 4'</b> Energy = -1716.195664332 |            |            | H          | 2.3762544 | -3.8441739 | -1.3222188 |            |
| N                                     | -1.2516352 | -1.0322213 | 0.6213296  | H         | 3.7501123  | -3.4346443 | -2.3695607 |
| N                                     | 0.9118296  | -1.2369647 | 0.3937100  | C         | 2.7246589  | -1.0592859 | -3.4130135 |
| N                                     | -0.4793765 | -0.3141319 | -3.6372913 | H         | 2.0980087  | -1.4246980 | -4.2371772 |
| N                                     | -0.1918294 | 0.4707995  | -2.8043286 | H         | 3.7791289  | -1.2316515 | -3.6776090 |
| C                                     | -0.1020672 | -0.3420807 | 0.4524789  | H         | 2.5568075  | 0.0213183  | -3.3210450 |
| C                                     | -0.9650327 | -2.3963098 | 0.6425572  | C         | -2.5360846 | -0.4383347 | 0.9244115  |
| H                                     | -1.7456691 | -3.1375012 | 0.7619006  | C         | -3.4742329 | -0.2733777 | -0.1121268 |
| C                                     | 0.3841997  | -2.5231104 | 0.5011852  | C         | -4.7187527 | 0.2704478  | 0.2396544  |
| H                                     | 1.0184158  | -3.4000347 | 0.4729455  | H         | -5.4741760 | 0.4115650  | -0.5349819 |
| C                                     | 2.3140594  | -0.8944600 | 0.3030044  | C         | -5.0015853 | 0.6430277  | 1.5524587  |
| C                                     | 3.0028134  | -1.1704394 | -0.8944693 | H         | -5.9761172 | 1.0694826  | 1.7989046  |
| C                                     | 4.3707538  | -0.8566782 | -0.9286810 | C         | -4.0434232 | 0.4784353  | 2.5518561  |
| H                                     | 4.9373277  | -1.0542158 | -1.8396403 | H         | -4.2735745 | 0.7801437  | 3.5755446  |
| C                                     | 5.0075275  | -0.2759845 | 0.1636512  | C         | -2.7875839 | -0.0723843 | 2.2630264  |
| H                                     | 6.0696065  | -0.0290553 | 0.1073224  | C         | -1.7572357 | -0.2370108 | 3.3709829  |
| C                                     | 4.2915125  | 0.0028594  | 1.3282420  | H         | -0.8916707 | -0.7772509 | 2.9606413  |
| H                                     | 4.8027835  | 0.4648086  | 2.1728134  | C         | -2.2963644 | -1.0835426 | 4.5358308  |
| C                                     | 2.9292759  | -0.3035980 | 1.4313574  | H         | -1.5068189 | -1.2432450 | 5.2855287  |
| C                                     | 2.1740226  | -0.0589684 | 2.7330382  | H         | -2.6420576 | -2.0671224 | 4.1865337  |
| H                                     | 1.1388557  | 0.2118713  | 2.4769398  | H         | -3.1389354 | -0.5870504 | 5.0393186  |
| C                                     | 2.1177661  | -1.3487335 | 3.5749685  | C         | -1.2595936 | 1.1344248  | 3.8608338  |
| H                                     | 1.5306520  | -1.1845596 | 4.4915768  | H         | -0.4867396 | 1.0091512  | 4.6339330  |
| H                                     | 3.1317857  | -1.6592035 | 3.8693155  | H         | -2.0828375 | 1.7185336  | 4.2987501  |
| H                                     | 1.6563623  | -2.1792555 | 3.0218547  | H         | -0.8306454 | 1.7258929  | 3.0381705  |
| C                                     | 2.7347688  | 1.1025051  | 3.5624194  | C         | -3.1856782 | -0.6671309 | -1.5489067 |
| H                                     | 2.0647163  | 1.3076728  | 4.4096294  | H         | -2.1084587 | -0.8564043 | -1.6485246 |
| H                                     | 2.8191065  | 2.0228699  | 2.9669879  | C         | -3.9243719 | -1.9663739 | -1.9181256 |
| H                                     | 3.7253919  | 0.8689021  | 3.9805733  | H         | -3.6623494 | -2.2652653 | -2.9434021 |
| C                                     | 2.3367768  | -1.7847646 | -2.1155145 | H         | -5.0158059 | -1.8293339 | -1.8678918 |
| H                                     | 1.2474149  | -1.6776290 | -2.0098870 | H         | -3.6576519 | -2.7928723 | -1.2418720 |
| C                                     | 2.6690112  | -3.2854933 | -2.2233125 | C         | -3.5245525 | 0.4630286  | -2.5323628 |

H -3.1960915 0.1753336 -3.5402747  
H -2.9907055 1.3839578 -2.2578457  
H -4.6048114 0.6716203 -2.5636583  
C 0.0590046 1.2282964 -1.8346911  
H -0.0218217 0.7280985 0.3027956  
Si 0.9411695 2.8073765 -1.6124044  
C 2.7463906 2.7791168 -2.2393005  
H 2.7829022 2.5907433 -3.3232142  
H 3.2517313 3.7388289 -2.0438272  
H 3.3120186 1.9803100 -1.7362488  
C 0.0510226 4.2762043 -2.4452171  
H -0.9761163 4.3707509 -2.0620854  
H 0.5804210 5.2249914 -2.2610113  
H -0.0080211 4.1219287 -3.5332639  
C 1.0217228 3.1636885 0.2654911  
H 0.0193393 3.1655335 0.7228282  
H 1.6427049 2.4165196 0.7848261  
H 1.4738214 4.1503019 0.4504691

82

**Comp 4'** Energy = -1716.227678941

N -0.8069954 0.6543913 0.0243103  
N 1.4055952 0.7908359 -0.5343865  
N -0.0018779 2.3683178 -3.4982526  
N -0.0346210 2.5918064 -2.3672151  
C 0.2818571 1.6429994 -0.1327866  
C -0.3755846 -0.5867442 -0.4786813  
H -1.0660743 -1.4161144 -0.5828567  
C 0.9417546 -0.5215927 -0.7636338  
H 1.6102607 -1.2857024 -1.1441268  
C 2.7472956 1.0885936 -0.1236563  
C 3.6782614 1.5358810 -1.0910602  
C 4.9819274 1.8451770 -0.6747123

H 5.7084746 2.1959658 -1.4109557  
C 5.3646865 1.7095183 0.6580416  
H 6.3836509 1.9563038 0.9642057  
C 4.4453991 1.2455187 1.5980132  
H 4.7569914 1.1216571 2.6377975  
C 3.1317760 0.9222894 1.2299289  
C 2.1801626 0.3740043 2.2832276  
H 1.1923251 0.2462767 1.8193347  
C 2.6267566 -1.0208692 2.7555925  
H 1.9037510 -1.4294414 3.4783361  
H 3.6115478 -0.9798841 3.2458219  
H 2.6960426 -1.7186343 1.9085638  
C 2.0338869 1.3378511 3.4722902  
H 1.3028052 0.9495572 4.1965098  
H 1.6970666 2.3333347 3.1458935  
H 2.9888195 1.4669404 4.0036174  
C 3.3099038 1.6765965 -2.5574529  
H 2.2708144 1.3409264 -2.6623236  
C 4.1776999 0.7728606 -3.4494330  
H 3.8435364 0.8394776 -4.4958139  
H 4.1108859 -0.2792053 -3.1347859  
H 5.2378955 1.0678476 -3.4163345  
C 3.3804984 3.1422397 -3.0149302  
H 3.0393361 3.2367020 -4.0563605  
H 4.4092861 3.5312673 -2.9561457  
H 2.7413219 3.7794760 -2.3869181  
C -2.1595867 1.0177443 0.2820809  
C -3.1329534 0.9835959 -0.7476345  
C -4.4522601 1.3427497 -0.4309397  
H -5.2131402 1.3165938 -1.2140276  
C -4.8055265 1.7572696 0.8492861  
H -5.8341540 2.0522364 1.0674419  
C -3.8391006 1.7889819 1.8559157



|    |            |            |            |                 |                          |            |            |
|----|------------|------------|------------|-----------------|--------------------------|------------|------------|
| H  | -4.1272545 | 2.0961960  | 2.8621300  | C               | -2.3430619               | 4.7968907  | -0.3648058 |
| C  | -2.5179371 | 1.4029910  | 1.6020737  | H               | -2.8220254               | 4.6766797  | -1.3478817 |
| C  | -1.5192414 | 1.2885069  | 2.7442527  | H               | -2.7803316               | 4.0508320  | 0.3142484  |
| H  | -0.5233573 | 1.5390195  | 2.3540817  | H               | -2.5862867               | 5.8021561  | 0.0133693  |
| C  | -1.4596917 | -0.1743002 | 3.2266992  |                 |                          |            |            |
| H  | -0.7238899 | -0.2884811 | 4.0376883  | 50              |                          |            |            |
| H  | -1.1745916 | -0.8496837 | 2.4077898  | TS <sub>7</sub> | Energy = -1097.338570492 |            |            |
| H  | -2.4416039 | -0.4913160 | 3.6099365  | N               | -0.3379499               | 1.3418831  | 1.8290607  |
| C  | -1.7910417 | 2.2386927  | 3.9162078  | N               | 0.5725767                | -0.5700994 | 2.2650641  |
| H  | -0.9559009 | 2.1968716  | 4.6306085  | C               | 0.5932462                | 0.1616633  | 3.4472331  |
| H  | -2.7034707 | 1.9645595  | 4.4674160  | H               | 1.0303666                | -0.2002044 | 4.3689769  |
| H  | -1.8981316 | 3.2804188  | 3.5789747  | C               | 0.0195246                | 1.3661165  | 3.1725805  |
| C  | -2.8109596 | 0.5758612  | -2.1771966 | H               | -0.1247359               | 2.2245542  | 3.8158999  |
| H  | -1.7208856 | 0.4772259  | -2.2670640 | C               | -1.0776117               | 2.4491794  | 1.1388700  |
| C  | -3.4281159 | -0.7942298 | -2.5134751 | C               | -2.5842983               | 2.1904695  | 1.3006475  |
| H  | -3.1503618 | -1.1011333 | -3.5329693 | H               | -3.1564842               | 2.9895001  | 0.8072252  |
| H  | -4.5269773 | -0.7535675 | -2.4579544 | H               | -2.8619541               | 2.1725692  | 2.3649131  |
| H  | -3.0883913 | -1.5743353 | -1.8163881 | H               | -2.8532204               | 1.2259585  | 0.8497772  |
| C  | -3.2675866 | 1.6356815  | -3.1936460 | C               | -0.6965221               | 3.7900218  | 1.7844298  |
| H  | -2.9094748 | 1.3750901  | -4.2000099 | H               | -1.1678201               | 4.6006399  | 1.2120431  |
| H  | -2.8711099 | 2.6285327  | -2.9399587 | H               | 0.3917591                | 3.9463813  | 1.7688316  |
| H  | -4.3648198 | 1.7097567  | -3.2348963 | H               | -1.0545048               | 3.8747716  | 2.8202519  |
| C  | -0.0307110 | 2.8258319  | -1.0960533 | C               | -0.6826054               | 2.4769276  | -0.3409644 |
| H  | 0.5033670  | 2.1489579  | 0.8243736  | H               | -1.1967590               | 3.3178713  | -0.8277609 |
| Si | -0.4660869 | 4.5705745  | -0.4981438 | H               | -0.9611965               | 1.5552151  | -0.8621264 |
| C  | 0.3352858  | 4.7810241  | 1.2092511  | H               | 0.4016485                | 2.6199160  | -0.4535502 |
| H  | 1.4119451  | 4.5571377  | 1.1805818  | C               | 1.0358207                | -1.9920982 | 2.1521875  |
| H  | 0.2121064  | 5.8240393  | 1.5389850  | C               | 1.5650793                | -2.2422688 | 0.7366052  |
| H  | -0.1346449 | 4.1385802  | 1.9684550  | H               | 1.9407194                | -3.2738614 | 0.6767622  |
| C  | 0.2463865  | 5.8148258  | -1.7367298 | H               | 2.3916050                | -1.5565465 | 0.5019626  |
| H  | -0.0455324 | 6.8390301  | -1.4595400 | H               | 0.7884315                | -2.1147219 | -0.0245128 |
| H  | 1.3445247  | 5.7640359  | -1.7632227 | C               | -0.1584562               | -2.9089440 | 2.4610846  |
| H  | -0.1277269 | 5.6231748  | -2.7537725 | H               | 0.1502085                | -3.9621866 | 2.3916615  |

|               |                          |            |            |    |            |            |            |
|---------------|--------------------------|------------|------------|----|------------|------------|------------|
| H             | -0.9711999               | -2.7249078 | 1.7457391  | C  | 0.0420207  | 2.5779893  | 0.3360358  |
| H             | -0.5355279               | -2.7258616 | 3.4783428  | C  | -1.2344160 | 2.4959428  | -0.5151748 |
| C             | 2.1684437                | -2.2361582 | 3.1607585  | H  | -1.2107429 | 3.2777241  | -1.2892724 |
| H             | 2.5647647                | -3.2486871 | 3.0041435  | H  | -2.1211234 | 2.6588679  | 0.1152034  |
| H             | 1.8225360                | -2.1811365 | 4.2025343  | H  | -1.2994339 | 1.5189591  | -1.0069859 |
| H             | 2.9914047                | -1.5204782 | 3.0192923  | C  | 0.1019990  | 3.9736909  | 0.9794428  |
| C             | -0.0124744               | 0.1440344  | 1.2574668  | H  | 0.1532265  | 4.7108451  | 0.1669882  |
| N             | -1.4857510               | -0.7941424 | 0.2022071  | H  | 0.9961856  | 4.1068635  | 1.6053636  |
| N             | -1.2430936               | -0.9487936 | -0.9585534 | H  | -0.7959841 | 4.2002191  | 1.5723719  |
| C             | -0.3724234               | -0.7511055 | -1.9176239 | C  | 1.3190997  | 2.3871927  | -0.4985941 |
| H             | 0.5399435                | -0.2405057 | -1.5494489 | H  | 1.3798442  | 3.1832446  | -1.2555437 |
| Si            | -0.6151259               | -1.3142654 | -3.6816683 | H  | 1.3073399  | 1.4201308  | -1.0127284 |
| C             | 0.1234236                | 0.0038692  | -4.8367416 | H  | 2.2083136  | 2.4549070  | 0.1455096  |
| H             | 1.1867841                | 0.1716277  | -4.6053060 | C  | -0.0367623 | -1.7993226 | 3.0050334  |
| H             | 0.0533505                | -0.3074664 | -5.8902584 | C  | 1.2622367  | -2.4639134 | 2.5171984  |
| H             | -0.4034967               | 0.9628289  | -4.7230745 | H  | 1.2672299  | -3.5212180 | 2.8194651  |
| C             | -2.4713374               | -1.5387322 | -4.0123738 | H  | 2.1371852  | -1.9710420 | 2.9669256  |
| H             | -2.6454432               | -1.9166113 | -5.0313079 | H  | 1.3347616  | -2.4004709 | 1.4253290  |
| H             | -2.9071311               | -2.2576823 | -3.3024282 | C  | -1.2770616 | -2.4867447 | 2.4078747  |
| H             | -3.0073908               | -0.5848696 | -3.9005581 | H  | -1.2940144 | -3.5412324 | 2.7193381  |
| C             | 0.2800963                | -2.9633701 | -4.0169651 | H  | -1.2524259 | -2.4344886 | 1.3135465  |
| H             | -0.1253346               | -3.7602378 | -3.3753264 | H  | -2.1957528 | -2.0033746 | 2.7722365  |
| H             | 0.1669845                | -3.2750888 | -5.0673823 | C  | -0.1022622 | -1.9044421 | 4.5352890  |
| H             | 1.3556703                | -2.8721202 | -3.8017778 | H  | -0.1069582 | -2.9698774 | 4.8010092  |
|               |                          |            |            | H  | -1.0201131 | -1.4557925 | 4.9424661  |
| 50            |                          |            |            | H  | 0.7716044  | -1.4451637 | 5.0199952  |
| <b>Comp 7</b> | Energy = -1097.398411305 |            |            | C  | -0.0001191 | 0.1324216  | 1.3030348  |
| N             | -0.0112142               | 1.5332339  | 1.4188708  | N  | 0.0529095  | -0.7504190 | 0.3108228  |
| N             | -0.0319472               | -0.3519335 | 2.6125497  | N  | -0.0348608 | -0.3156682 | -0.9753222 |
| C             | -0.0634873               | 0.7155016  | 3.4987022  | C  | 0.0833134  | -1.2439229 | -1.8847528 |
| H             | -0.0927205               | 0.5869530  | 4.5709724  | H  | 0.2521876  | -2.2870810 | -1.5465610 |
| C             | -0.0537919               | 1.8599146  | 2.7765435  | Si | 0.0026571  | -0.8343924 | -3.7246105 |
| H             | -0.0744121               | 2.8803085  | 3.1291115  | C  | -1.2708039 | -1.9814319 | -4.5515261 |

|                       |                          |            |            |    |           |            |            |
|-----------------------|--------------------------|------------|------------|----|-----------|------------|------------|
| H                     | -2.2789045               | -1.8052711 | -4.1477143 | C  | 6.6426477 | 3.3625439  | 10.5078707 |
| H                     | -1.3013387               | -1.8132385 | -5.6391145 | C  | 7.0902767 | 1.9163972  | 10.2976376 |
| H                     | -1.0162279               | -3.0382798 | -4.3791659 | H  | 6.7564950 | 1.3135797  | 11.1530005 |
| C                     | 1.7065559                | -1.1652825 | -4.5080833 | H  | 8.1833719 | 1.8413168  | 10.2211663 |
| H                     | 1.6772894                | -0.9984269 | -5.5961426 | H  | 6.6505672 | 1.4974580  | 9.3867789  |
| H                     | 2.4701016                | -0.4997208 | -4.0783437 | C  | 5.1135027 | 3.4409595  | 10.6164144 |
| H                     | 2.0243559                | -2.2041265 | -4.3321812 | H  | 4.7725575 | 2.8195290  | 11.4570380 |
| C                     | -0.4792174               | 0.9807844  | -3.9867519 | H  | 4.6380095 | 3.0729972  | 9.6973972  |
| H                     | 0.2366727                | 1.6499260  | -3.4884485 | H  | 4.7709304 | 4.4694389  | 10.8005898 |
| H                     | -0.4907970               | 1.2217372  | -5.0605804 | C  | 7.3142540 | 3.9323695  | 11.7700393 |
| H                     | -1.4771320               | 1.1888855  | -3.5749429 | H  | 7.0389249 | 3.3227269  | 12.6416131 |
|                       |                          |            |            | H  | 7.0028029 | 4.9678015  | 11.9664488 |
| 50                    |                          |            |            | H  | 8.4079437 | 3.9121338  | 11.6620792 |
| <b>TS<sub>7</sub></b> | Energy = -1097.341440323 |            |            | C  | 7.9110204 | 3.7650486  | 8.3386436  |
| N                     | 8.2316775                | 4.8958211  | 7.6430019  | N  | 6.6386024 | 3.0601391  | 4.7131632  |
| N                     | 7.0930733                | 4.1913024  | 9.3463435  | N  | 6.7394894 | 2.3987280  | 5.6705083  |
| C                     | 6.8826572                | 5.5600503  | 9.2626230  | C  | 6.9319108 | 1.7407505  | 6.7481655  |
| H                     | 6.2585068                | 6.1074643  | 9.9585461  | H  | 7.6436858 | 2.6328930  | 7.6947623  |
| C                     | 7.5968542                | 6.0025891  | 8.1914781  | Si | 5.9684283 | 0.1530527  | 6.9570319  |
| H                     | 7.7018150                | 7.0035449  | 7.7916628  | C  | 5.5775625 | -0.5803831 | 5.2452053  |
| C                     | 9.3195091                | 5.0173966  | 6.6129152  | H  | 6.5009432 | -0.8592665 | 4.7163805  |
| C                     | 8.7477441                | 5.6523191  | 5.3394983  | H  | 4.9496801 | -1.4797996 | 5.3405238  |
| H                     | 9.5536043                | 5.7685392  | 4.6013673  | H  | 5.0372414 | 0.1477494  | 4.6214408  |
| H                     | 8.3316915                | 6.6509418  | 5.5374293  | C  | 4.3034455 | 0.4684911  | 7.8398655  |
| H                     | 7.9637759                | 5.0170083  | 4.9051569  | H  | 3.6837324 | -0.4420110 | 7.8446829  |
| C                     | 10.4128309               | 5.9150413  | 7.2244803  | H  | 4.4437204 | 0.7861037  | 8.8835203  |
| H                     | 11.2555120               | 5.9955631  | 6.5242574  | H  | 3.7454504 | 1.2604264  | 7.3174453  |
| H                     | 10.7823229               | 5.4856770  | 8.1669544  | C  | 6.9540766 | -1.1219720 | 7.9660912  |
| H                     | 10.0438598               | 6.9311597  | 7.4250214  | H  | 7.2370498 | -0.7388950 | 8.9570580  |
| C                     | 9.9092456                | 3.6362098  | 6.3173486  | H  | 6.3463092 | -2.0283314 | 8.1153118  |
| H                     | 10.7364105               | 3.7614945  | 5.6039310  | H  | 7.8746017 | -1.4087692 | 7.4369348  |
| H                     | 9.1759310                | 2.9563591  | 5.8703605  |    |           |            |            |
| H                     | 10.3054950               | 3.1715724  | 7.2314269  | 50 |           |            |            |

Comp 7' Energy = -1097.370555239

N -0.6937940 1.0774649 -1.0381119  
N -0.5389590 0.1992160 1.1330509  
C -1.6511879 1.0583579 1.0192519  
H -2.3897168 1.1213239 1.8121789  
C -1.7396539 1.5628819 -0.2269970  
H -2.5653958 2.1204168 -0.6575510  
C -0.0073160 1.9993619 -1.9868719  
C -1.0796079 2.7741648 -2.7687898  
H -0.5980570 3.3560528 -3.5670267  
H -1.6260889 3.4801037 -2.1279038  
H -1.7997719 2.0813889 -3.2282868  
C 0.9024259 2.9960448 -1.2402919  
H 1.3413359 3.7226577 -1.9400749  
H 1.7343849 2.4838978 -0.7332879  
H 0.3224350 3.5446407 -0.4832460  
C 0.8140409 1.1690179 -2.9820368  
H 1.2839269 1.8299749 -3.7247757  
H 0.1720180 0.4447810 -3.5029507  
H 1.6158329 0.6139300 -2.4785058  
C 0.3033280 0.2449760 2.3618038  
C 1.2032359 -0.9967719 2.3956698  
H 1.7933799 -1.0068739 3.3236198  
H 1.9085529 -1.0086639 1.5545009  
H 0.5989630 -1.9132369 2.3459328  
C -0.6250780 0.2041650 3.5854567  
H -0.0216320 0.0972720 4.4976947  
H -1.3128959 -0.6515590 3.5203037  
H -1.2148349 1.1261749 3.6849827  
C 1.1568129 1.5277719 2.4092418  
H 1.7138139 1.5897569 3.3557948  
H 0.5126260 2.4154628 2.3224588  
H 1.8928199 1.5565009 1.5910859

C 0.1125120 0.1568070 -0.1991430  
N -2.0020409 -2.3398138 -1.0874119  
N -0.9699689 -1.8489219 -0.9494429  
C 0.1795480 -1.2740739 -0.7853539  
H 1.1619379 0.4956510 -0.1365990  
Si 1.6986379 -2.2895238 -1.2898539  
C 1.5675669 -2.7461268 -3.1267648  
H 1.5874419 -1.8463439 -3.7585357  
H 2.4017158 -3.3993708 -3.4255918  
H 0.6283860 -3.2827508 -3.3296528  
C 1.7594569 -3.8836947 -0.2630430  
H 2.5900768 -4.5277677 -0.5904900  
H 1.8940209 -3.6601667 0.8049609  
H 0.8245899 -4.4527757 -0.3757260  
C 3.2720378 -1.2676059 -0.9934419  
H 3.4115068 -0.9937459 0.0617200  
H 4.1355397 -1.8833609 -1.2900569  
H 3.2998438 -0.3486590 -1.5950009  
53

TS<sub>14</sub> Energy = -1034.459009204

N -0.2917298 1.3931519 1.9619184  
N 0.6059347 -0.5160276 2.4039217  
C 0.5196839 0.1705472 3.6109627  
H 0.8835130 -0.2198655 4.5529411  
C -0.0477451 1.3771263 3.3317982  
H -0.2587251 2.2099313 3.9906405  
C -0.9806967 2.5137335 1.2437442  
C -2.4933313 2.2420298 1.2703701  
H -3.0302799 3.0511497 0.7546206  
H -2.8605837 2.1888395 2.3059206  
H -2.7198805 1.2917027 0.7688098  
C -0.6659824 3.8398585 1.9515024  
H -1.0966865 4.6632655 1.3655687

|   |            |            |            |                                         |            |            |            |
|---|------------|------------|------------|-----------------------------------------|------------|------------|------------|
| H | 0.4186295  | 4.0038843  | 2.0278645  | H                                       | 2.1097238  | -0.8292246 | -7.1883021 |
| H | -1.1062942 | 3.8922909  | 2.9570451  | H                                       | 2.0234037  | 0.4563846  | -5.9528551 |
| C | -0.4655998 | 2.5812839  | -0.1979152 | H                                       | 2.7968256  | -1.1047456 | -5.5639664 |
| H | -0.9380130 | 3.4344049  | -0.7049652 | C                                       | -0.5240477 | -0.4774493 | -6.3758676 |
| H | -0.7056465 | 1.6731281  | -0.7596615 | H                                       | -0.4948277 | 0.6036971  | -6.1758444 |
| H | 0.6244166  | 2.7210516  | -0.2183645 | H                                       | -0.4163511 | -0.6284185 | -7.4603528 |
| C | 1.1033758  | -1.9236298 | 2.2715834  | H                                       | -1.4952903 | -0.8728408 | -6.0576410 |
| C | 1.7375310  | -2.1074089 | 0.8886453  |                                         |            |            |            |
| H | 2.1376591  | -3.1285184 | 0.8133823  | 53                                      |            |            |            |
| H | 2.5615397  | -1.3960137 | 0.7379586  | <b>Comp 14</b> Energy = -1034.517239759 |            |            |            |
| H | 1.0094895  | -1.9642024 | 0.0840880  | O                                       | 6.5623812  | 5.9813016  | 9.3341681  |
| C | -0.0912245 | -2.8734213 | 2.4550982  | O                                       | 8.1093353  | 6.1103459  | 11.0390188 |
| H | 0.2424889  | -3.9180326 | 2.3731349  | N                                       | 2.2428572  | 8.6853307  | 10.2655285 |
| H | -0.8522463 | -2.6834648 | 1.6866321  | N                                       | 2.3440331  | 9.6561425  | 12.2702315 |
| H | -0.5502758 | -2.7342951 | 3.4452544  | N                                       | 4.2752508  | 8.4361955  | 11.7663779 |
| C | 2.1645934  | -2.1909609 | 3.3493844  | N                                       | 4.9462168  | 7.6490878  | 10.9230061 |
| H | 2.5900100  | -3.1902626 | 3.1845047  | C                                       | 3.0571785  | 8.8518734  | 11.3904825 |
| H | 1.7425490  | -2.1808140 | 4.3639776  | C                                       | 1.1207313  | 9.9759547  | 11.7052146 |
| H | 2.9822862  | -1.4574025 | 3.2958543  | H                                       | 0.3872480  | 10.5933086 | 12.2032033 |
| C | 0.0964419  | 0.2230168  | 1.3743764  | C                                       | 1.0584805  | 9.3859551  | 10.4866066 |
| N | -1.4242724 | -0.8152485 | -0.0039724 | H                                       | 0.2567444  | 9.4157198  | 9.7641594  |
| N | -1.0509481 | -0.8960931 | -1.1049807 | C                                       | 2.5021520  | 7.9174771  | 8.9846197  |
| C | -0.1737596 | -0.7041877 | -2.0648127 | C                                       | 2.6757838  | 6.4245550  | 9.3031667  |
| H | 0.7471602  | -0.1923845 | -1.7684266 | H                                       | 2.7767750  | 5.8683112  | 8.3603413  |
| C | -0.4486147 | -1.1593605 | -3.4109375 | H                                       | 1.7933155  | 6.0428505  | 9.8379298  |
| O | -1.4628205 | -1.7447990 | -3.7849653 | H                                       | 3.5801194  | 6.2558780  | 9.8972329  |
| O | 0.6162716  | -0.8300862 | -4.2119454 | C                                       | 3.7252838  | 8.5105375  | 8.2690137  |
| C | 0.6253965  | -1.1812215 | -5.6499693 | H                                       | 3.8557148  | 8.0016311  | 7.3031110  |
| C | 0.5760192  | -2.7014700 | -5.8240315 | H                                       | 4.6348287  | 8.3566006  | 8.8592370  |
| H | -0.3892627 | -3.1062567 | -5.4992009 | H                                       | 3.5737528  | 9.5834390  | 8.0784914  |
| H | 0.7275239  | -2.9512874 | -6.8846333 | C                                       | 1.2844962  | 8.0706516  | 8.0575949  |
| H | 1.3783712  | -3.1776034 | -5.2416981 | H                                       | 1.4995123  | 7.5086370  | 7.1393538  |
| C | 1.9734007  | -0.6296012 | -6.1158860 | H                                       | 1.1052989  | 9.1166635  | 7.7693660  |

|   |            |            |            |   |            |            |            |
|---|------------|------------|------------|---|------------|------------|------------|
| H | 0.3682575  | 7.6483999  | 8.4946683  | O | -2.5253568 | -0.4429627 | -2.6722660 |
| C | 2.8144598  | 10.1081186 | 13.6255225 | O | -1.9346751 | 1.3876733  | -1.3942534 |
| C | 1.7282470  | 10.9846865 | 14.2642027 | O | 0.0360549  | 0.1220380  | 3.2941312  |
| H | 2.0916644  | 11.3064690 | 15.2489340 | N | -0.2516150 | -0.7367153 | 0.1414296  |
| H | 0.7889072  | 10.4346293 | 14.4202063 | N | 0.2226876  | 0.5088613  | 0.2831289  |
| H | 1.5251172  | 11.8892492 | 13.6729792 | N | -2.6440262 | -0.1310277 | 0.8233644  |
| C | 3.0489959  | 8.8767216  | 14.5162530 | N | -2.0686017 | 0.8204845  | 1.4522049  |
| H | 3.3674894  | 9.2077260  | 15.5152583 | C | -2.0710536 | -0.6945887 | -0.3412457 |
| H | 3.8268353  | 8.2341200  | 14.0878312 | C | -2.1948330 | 0.0667034  | -1.5924263 |
| H | 2.1202571  | 8.2969934  | 14.6227897 | C | -2.4531648 | 2.4364981  | -2.3090887 |
| C | 4.0963751  | 10.9426659 | 13.4665496 | C | -1.8218679 | 2.3449493  | -3.6994626 |
| H | 4.4216210  | 11.2979150 | 14.4549960 | H | -2.1731876 | 3.1936107  | -4.3053331 |
| H | 3.9082472  | 11.8188435 | 12.8286226 | H | -2.1018891 | 1.4110934  | -4.1996003 |
| H | 4.8954585  | 10.3392775 | 13.0215144 | H | -0.7273800 | 2.4034264  | -3.6352662 |
| C | 6.1301744  | 7.2658781  | 11.3222774 | C | -3.9766863 | 2.3190601  | -2.3672220 |
| H | 6.5509787  | 7.5712140  | 12.2896399 | H | -4.3887344 | 3.1689003  | -2.9303758 |
| C | 6.9088117  | 6.3966762  | 10.4364339 | H | -4.3981838 | 2.3356967  | -1.3521332 |
| C | 9.1055214  | 5.2354472  | 10.3811438 | H | -4.2820577 | 1.3899924  | -2.8652906 |
| C | 10.2433693 | 5.1993391  | 11.4020163 | C | -2.0257042 | 3.7221936  | -1.6027251 |
| H | 11.0629853 | 4.5692171  | 11.0282254 | H | -2.3578123 | 4.5967977  | -2.1798383 |
| H | 9.8913415  | 4.7858895  | 12.3576315 | H | -0.9311477 | 3.7611243  | -1.5073706 |
| H | 10.6336724 | 6.2111349  | 11.5814101 | H | -2.4676223 | 3.7736125  | -0.5980781 |
| C | 9.5793931  | 5.8653127  | 9.0683681  | C | -0.6749431 | 1.1903454  | 1.2062866  |
| H | 10.4163787 | 5.2769134  | 8.6639864  | H | -0.7116542 | 2.2490754  | 0.9093445  |
| H | 9.9342136  | 6.8911563  | 9.2449427  | C | 0.0605592  | 1.0930294  | 2.5548115  |
| H | 8.7730053  | 5.8901189  | 8.3264476  | O | 0.8052174  | 2.2110101  | 2.7314491  |
| C | 8.5242933  | 3.8341768  | 10.1734104 | N | 1.1058170  | -1.6352096 | -1.8499131 |
| H | 9.3180070  | 3.1604034  | 9.8180221  | N | 0.4469047  | -2.9616692 | -0.1965292 |
| H | 7.7131841  | 3.8457375  | 9.4361637  | C | 0.4348234  | -1.6538429 | -0.6343569 |
| H | 8.1376661  | 3.4377967  | 11.1235038 | C | 1.0574141  | -3.7491128 | -1.1481587 |
|   |            |            |            | H | 1.1747554  | -4.8175998 | -1.0435024 |
|   |            |            |            | C | 1.4555686  | -2.9375355 | -2.1608558 |
|   |            |            |            | H | 1.9552211  | -3.1974700 | -3.0836695 |

73

TS<sub>int1</sub> Energy = -1528.648750409

|   |            |            |            |                                       |            |            |            |
|---|------------|------------|------------|---------------------------------------|------------|------------|------------|
| C | 1.7918921  | 2.3066606  | 3.8430641  | H                                     | 0.6302072  | -1.7377873 | -4.5231619 |
| C | 1.0660086  | 2.2760718  | 5.1888143  | H                                     | -0.5397907 | -0.6146914 | -3.7763115 |
| H | 0.6034589  | 1.2988742  | 5.3688493  | C                                     | 2.9179877  | -0.7730670 | -3.2891007 |
| H | 1.7863760  | 2.4822278  | 5.9940206  | H                                     | 3.0759578  | -1.6957763 | -3.8628355 |
| H | 0.2857591  | 3.0505329  | 5.2194774  | H                                     | 3.2162076  | 0.0627140  | -3.9358677 |
| C | 2.4272596  | 3.6743818  | 3.5973217  | H                                     | 3.5788608  | -0.7799801 | -2.4110020 |
| H | 3.1824375  | 3.8795900  | 4.3690235  | H                                     | -2.3993722 | -1.7264003 | -0.4904277 |
| H | 2.9141629  | 3.7031194  | 2.6123969  |                                       |            |            |            |
| H | 1.6656782  | 4.4661122  | 3.6346581  | 73                                    |            |            |            |
| C | 2.8322512  | 1.1930067  | 3.7118237  | <i>Int1'</i> Energy = -1528.669939633 |            |            |            |
| H | 3.2525365  | 1.1840820  | 2.6956970  | O                                     | -1.6390025 | 0.7112885  | -3.1771479 |
| H | 3.6506281  | 1.3768383  | 4.4232789  | O                                     | -0.5602718 | 2.1773544  | -1.7720740 |
| H | 2.3945244  | 0.2106046  | 3.9238044  | O                                     | -0.9334933 | -0.2531754 | 2.9423961  |
| C | 0.1623734  | -3.4537208 | 1.2207879  | N                                     | -0.2432586 | -0.3179439 | -0.1995827 |
| C | 1.4503202  | -0.5517807 | -2.8718656 | N                                     | 0.5975632  | 0.5918118  | 0.4700521  |
| C | 0.3751318  | -4.9740104 | 1.2561755  | N                                     | -2.2553057 | 1.1069214  | 0.1193969  |
| H | 1.4155456  | -5.2608075 | 1.0476011  | N                                     | -1.6312335 | 1.7570322  | 1.0028149  |
| H | 0.1406977  | -5.3137445 | 2.2730382  | C                                     | -1.4827228 | 0.2293265  | -0.8043608 |
| H | -0.2981240 | -5.5047110 | 0.5669742  | C                                     | -1.2393688 | 1.0548632  | -2.0677298 |
| C | 1.1775670  | -2.7720348 | 2.1486027  | C                                     | -0.4576250 | 3.3232446  | -2.7205597 |
| H | 1.0178526  | -1.6889004 | 2.1808081  | C                                     | 0.3388068  | 2.9439027  | -3.9675989 |
| H | 1.0445841  | -3.1581255 | 3.1692164  | H                                     | 0.4758715  | 3.8418876  | -4.5882714 |
| H | 2.2060656  | -2.9920632 | 1.8258646  | H                                     | -0.1854899 | 2.1847017  | -4.5590934 |
| C | -1.2784096 | -3.1539106 | 1.6456961  | H                                     | 1.3323841  | 2.5657432  | -3.6925275 |
| H | -1.9979518 | -3.5738001 | 0.9284150  | C                                     | -1.8688544 | 3.8020175  | -3.0603581 |
| H | -1.4537245 | -3.6338844 | 2.6191164  | H                                     | -1.8052265 | 4.7330355  | -3.6419836 |
| H | -1.4565666 | -2.0820700 | 1.7624139  | H                                     | -2.4339186 | 4.0048184  | -2.1397610 |
| C | 1.3377425  | 0.8592459  | -2.3088619 | H                                     | -2.4102748 | 3.0557553  | -3.6548720 |
| H | 1.6035385  | 1.5521458  | -3.1206650 | C                                     | 0.2915848  | 4.3586795  | -1.8844472 |
| H | 0.3357527  | 1.0991930  | -1.9477361 | H                                     | 0.4238231  | 5.2826492  | -2.4646085 |
| H | 2.0241172  | 1.0128846  | -1.4683279 | H                                     | 1.2814688  | 3.9776798  | -1.5967366 |
| C | 0.5098920  | -0.7420603 | -4.0717201 | H                                     | -0.2709725 | 4.5918873  | -0.9699553 |
| H | 0.7538901  | 0.0077611  | -4.8372518 | C                                     | -0.2205336 | 1.4216723  | 1.2986101  |

|   |            |            |            |                                                  |            |            |            |
|---|------------|------------|------------|--------------------------------------------------|------------|------------|------------|
| H | 0.2825835  | 2.3939030  | 1.4154057  | C                                                | -2.4049036 | -2.2775881 | 0.8133611  |
| C | -0.2740932 | 0.7453146  | 2.6777112  | H                                                | -3.0440255 | -2.2335047 | -0.0794689 |
| O | 0.6078276  | 1.3535599  | 3.5140825  | H                                                | -2.9916258 | -2.7422716 | 1.6184330  |
| N | 1.3718231  | -1.6368994 | -1.6047528 | H                                                | -2.1435085 | -1.2727043 | 1.1550774  |
| N | -0.3227456 | -2.6854567 | -0.6086409 | C                                                | 2.5004269  | 0.6510037  | -1.6487273 |
| C | 0.2690274  | -1.4471891 | -0.7821545 | H                                                | 3.1396806  | 1.2683638  | -2.2969477 |
| C | 0.3655209  | -3.6115979 | -1.3726634 | H                                                | 1.5694167  | 1.1842187  | -1.4381111 |
| H | 0.0817797  | -4.6520019 | -1.4320959 | H                                                | 3.0039671  | 0.5111950  | -0.6841960 |
| C | 1.4057368  | -2.9760172 | -1.9625302 | C                                                | 1.6751537  | -0.4863783 | -3.7524709 |
| H | 2.1544114  | -3.3755664 | -2.6314467 | H                                                | 2.3224173  | 0.1730333  | -4.3474836 |
| C | 0.9205307  | 0.7744866  | 4.8477282  | H                                                | 1.5835939  | -1.4454507 | -4.2820945 |
| C | -0.3285097 | 0.7835413  | 5.7310095  | H                                                | 0.6802090  | -0.0292875 | -3.6891420 |
| H | -1.0906561 | 0.0960274  | 5.3467835  | C                                                | 3.6749935  | -1.3593265 | -2.4785777 |
| H | -0.0543193 | 0.4763726  | 6.7513649  | H                                                | 3.6847077  | -2.2235440 | -3.1564741 |
| H | -0.7534878 | 1.7964514  | 5.7790564  | H                                                | 4.3764533  | -0.6226691 | -2.8919240 |
| C | 1.9733105  | 1.7426353  | 5.3863544  | H                                                | 4.0487648  | -1.6699482 | -1.4931770 |
| H | 2.2891598  | 1.4303802  | 6.3918755  | H                                                | -2.1409969 | -0.5927179 | -1.0974554 |
| H | 2.8551821  | 1.7589036  | 4.7306029  |                                                  |            |            |            |
| H | 1.5642565  | 2.7608181  | 5.4481536  | 53                                               |            |            |            |
| C | 1.5088183  | -0.6285792 | 4.6827393  | <b>TS<sub>14'</sub></b> Energy = -1034.463158091 |            |            |            |
| H | 2.3331405  | -0.6120075 | 3.9546366  | N                                                | 8.7342448  | 4.6839546  | 7.9688178  |
| H | 1.9076668  | -0.9715308 | 5.6485276  | N                                                | 7.1182139  | 4.3206601  | 9.3591310  |
| H | 0.7483430  | -1.3406122 | 4.3423153  | C                                                | 7.8152639  | 5.4222324  | 9.8358681  |
| C | -1.1747767 | -3.1548738 | 0.5765158  | H                                                | 7.5512127  | 5.9508279  | 10.7424664 |
| C | 2.2954830  | -0.6820021 | -2.3590992 | C                                                | 8.8324290  | 5.6550190  | 8.9558311  |
| C | -1.6615829 | -4.5826648 | 0.2824004  | H                                                | 9.5972674  | 6.4203983  | 8.9689285  |
| H | -0.8476057 | -5.3206076 | 0.2761119  | C                                                | 9.6273557  | 4.5386235  | 6.7694567  |
| H | -2.3488922 | -4.8698515 | 1.0881626  | C                                                | 8.8308271  | 4.9564503  | 5.5245159  |
| H | -2.2156549 | -4.6389234 | -0.6659560 | H                                                | 9.4681360  | 4.8771719  | 4.6324523  |
| C | -0.2405117 | -3.1541455 | 1.7944710  | H                                                | 8.4842300  | 5.9963820  | 5.6126519  |
| H | 0.1068532  | -2.1381440 | 2.0147846  | H                                                | 7.9588937  | 4.3065713  | 5.3793897  |
| H | -0.7888174 | -3.5172795 | 2.6751872  | C                                                | 10.8541831 | 5.4416162  | 6.9362096  |
| H | 0.6209948  | -3.8157549 | 1.6205046  | H                                                | 11.5201969 | 5.2819636  | 6.0784327  |



|   |            |            |            |                                          |            |            |            |
|---|------------|------------|------------|------------------------------------------|------------|------------|------------|
| H | 11.4161449 | 5.1987361  | 7.8497405  | H                                        | 5.5889805  | -1.5771453 | 8.3820571  |
| H | 10.5851580 | 6.5079338  | 6.9509105  | H                                        | 4.0330295  | -1.2822950 | 7.5519181  |
| C | 10.0672691 | 3.0707281  | 6.6756383  | H                                        | 4.6962852  | -2.9340972 | 7.6371832  |
| H | 10.7359529 | 2.9469478  | 5.8121103  | C                                        | 7.0352202  | -2.3947807 | 6.1596144  |
| H | 9.2043886  | 2.4041348  | 6.5425821  | H                                        | 7.5598061  | -2.1713296 | 5.2189507  |
| H | 10.6093284 | 2.7686796  | 7.5832388  | H                                        | 7.6744036  | -2.1050277 | 7.0012644  |
| C | 5.9525594  | 3.6453794  | 10.0282754 | H                                        | 6.8556131  | -3.4792733 | 6.2030166  |
| C | 6.4017188  | 2.2378118  | 10.4469278 |                                          |            |            |            |
| H | 5.5675351  | 1.7173063  | 10.9391342 | 53                                       |            |            |            |
| H | 7.2399838  | 2.2968813  | 11.1571726 | <b>Comp 14'</b> Energy = -1034.480475694 |            |            |            |
| H | 6.7185375  | 1.6413833  | 9.5794054  | N                                        | 8.4496201  | 4.1329996  | 7.5909851  |
| C | 4.7918606  | 3.5802272  | 9.0260119  | N                                        | 6.8370506  | 3.9831476  | 9.1454451  |
| H | 3.9239417  | 3.1046371  | 9.5038997  | C                                        | 6.7929136  | 5.2687506  | 8.5819852  |
| H | 5.0651130  | 2.9856150  | 8.1434435  | H                                        | 6.1244719  | 6.0406098  | 8.9436382  |
| H | 4.5002612  | 4.5888791  | 8.6988424  | C                                        | 7.7668359  | 5.3592523  | 7.6420987  |
| C | 5.5310981  | 4.4536963  | 11.2594280 | H                                        | 8.0748438  | 6.2217752  | 7.0636769  |
| H | 4.6696395  | 3.9526981  | 11.7202468 | C                                        | 9.4855906  | 3.8018305  | 6.5883139  |
| H | 5.2229368  | 5.4757995  | 10.9946940 | C                                        | 8.8949145  | 3.6408612  | 5.1697820  |
| H | 6.3289781  | 4.5015831  | 12.0151533 | H                                        | 9.7049345  | 3.5143524  | 4.4364116  |
| C | 7.6799797  | 3.8627348  | 8.2104609  | H                                        | 8.3118133  | 4.5298918  | 4.8880429  |
| N | 5.4566687  | 2.9226788  | 4.5322549  | H                                        | 8.2404106  | 2.7617076  | 5.1045914  |
| N | 5.9820775  | 2.3930572  | 5.4140588  | C                                        | 10.5156997 | 4.9461383  | 6.5813937  |
| C | 6.6269673  | 1.9635181  | 6.4429152  | H                                        | 11.3513947 | 4.6828171  | 5.9178216  |
| H | 7.1623945  | 2.8833949  | 7.3103326  | H                                        | 10.9096221 | 5.1171044  | 7.5933038  |
| C | 6.6265228  | 0.5720271  | 6.8194337  | H                                        | 10.0847823 | 5.8867842  | 6.2108299  |
| O | 7.2174240  | 0.1373812  | 7.8141383  | C                                        | 10.1918230 | 2.5066697  | 7.0156823  |
| O | 5.8891492  | -0.2111519 | 5.9584777  | H                                        | 11.0056397 | 2.2882750  | 6.3104574  |
| C | 5.6949465  | -1.6558344 | 6.2057853  | H                                        | 9.5118209  | 1.6436829  | 7.0217673  |
| C | 4.8107145  | -2.0728145 | 5.0295782  | H                                        | 10.6253063 | 2.6132373  | 8.0213260  |
| H | 5.3214985  | -1.8773496 | 4.0761298  | C                                        | 5.8373735  | 3.4641935  | 10.1043892 |
| H | 4.5821798  | -3.1464547 | 5.0918369  | C                                        | 6.3537228  | 2.1424902  | 10.6918548 |
| H | 3.8662871  | -1.5109152 | 5.0400275  | H                                        | 5.6475359  | 1.7846580  | 11.4541294 |
| C | 4.9615729  | -1.8713158 | 7.5327669  | H                                        | 7.3342572  | 2.2848500  | 11.1701619 |

|   |           |            |            |   |           |            |            |
|---|-----------|------------|------------|---|-----------|------------|------------|
| H | 6.4517458 | 1.3574731  | 9.9295454  | N | 3.5122379 | -0.5268333 | -1.2491729 |
| C | 4.4554788 | 3.2483252  | 9.4490361  | N | 3.4100767 | -1.8797080 | 0.4639039  |
| H | 3.7145467 | 2.9746609  | 10.2142232 | C | 4.3147172 | -2.4214009 | -0.4344159 |
| H | 4.4863700 | 2.4420597  | 8.7040201  | H | 4.8441601 | -3.3456725 | -0.2445011 |
| H | 4.1118700 | 4.1675341  | 8.9523937  | C | 4.3787341 | -1.5751625 | -1.5046170 |
| C | 5.7030246 | 4.4913095  | 11.2435667 | H | 4.9747368 | -1.6354477 | -2.4049129 |
| H | 5.0336095 | 4.0942071  | 12.0197545 | C | 3.1786360 | 0.6192661  | -2.1782778 |
| H | 5.2745334 | 5.4407174  | 10.8929281 | C | 3.1836346 | 1.9130973  | -1.3554631 |
| H | 6.6840021 | 4.6971511  | 11.6949366 | H | 2.9190102 | 2.7522935  | -2.0121547 |
| C | 7.5885123 | 3.1532890  | 8.2239977  | H | 4.1787726 | 2.1008693  | -0.9269179 |
| N | 5.1018698 | 3.4152326  | 5.6857732  | H | 2.4401031 | 1.8852674  | -0.5474448 |
| N | 5.8413126 | 2.8932182  | 6.3979054  | C | 4.2449057 | 0.6892403  | -3.2751635 |
| C | 6.6796253 | 2.3168013  | 7.2044672  | H | 4.0302994 | 1.5652457  | -3.9002584 |
| H | 8.1484324 | 2.3549337  | 8.7271588  | H | 4.2245274 | -0.1928929 | -3.9311448 |
| C | 6.8033224 | 0.8675457  | 7.1936802  | H | 5.2555420 | 0.8108867  | -2.8585416 |
| O | 7.5890365 | 0.2521278  | 7.9179231  | C | 1.7966206 | 0.3333897  | -2.7804944 |
| O | 5.9521787 | 0.2979357  | 6.2984275  | H | 1.5426240 | 1.1288395  | -3.4941828 |
| C | 5.9081612 | -1.1752958 | 6.1037469  | H | 1.0174443 | 0.3306240  | -2.0062084 |
| C | 4.8302548 | -1.3263778 | 5.0314600  | H | 1.7993074 | -0.6286179 | -3.3135952 |
| H | 5.1175095 | -0.7907364 | 4.1157500  | C | 2.9721573 | -2.5373202 | 1.7500363  |
| H | 4.6934838 | -2.3893370 | 4.7877955  | C | 1.9512473 | -3.6247709 | 1.3814072  |
| H | 3.8722951 | -0.9216444 | 5.3868320  | H | 1.6144442 | -4.1318583 | 2.2959656  |
| C | 5.4841370 | -1.8647155 | 7.4021133  | H | 2.3943457 | -4.3777073 | 0.7132133  |
| H | 6.2546475 | -1.7675145 | 8.1756840  | H | 1.0765901 | -3.1771608 | 0.8898563  |
| H | 4.5448969 | -1.4311063 | 7.7747044  | C | 2.3319265 | -1.4848625 | 2.6551081  |
| H | 5.3134798 | -2.9336195 | 7.2058626  | H | 2.0773658 | -1.9548212 | 3.6140045  |
| C | 7.2601471 | -1.6747585 | 5.5913704  | H | 1.4034905 | -1.1002631 | 2.2175474  |
| H | 7.5636573 | -1.1059482 | 4.7003082  | H | 3.0165994 | -0.6490481 | 2.8572529  |
| H | 8.0371717 | -1.5789989 | 6.3585842  | C | 4.2098635 | -3.1387021 | 2.4277254  |
| H | 7.1716322 | -2.7336405 | 5.3074780  | H | 3.9056468 | -3.5597137 | 3.3949726  |
|   |           |            |            | H | 4.9738877 | -2.3704259 | 2.6124007  |
|   |           |            |            | H | 4.6567034 | -3.9548387 | 1.8429455  |
|   |           |            |            | C | 2.9242061 | -0.7356892 | -0.0547866 |

73

**TS<sub>int1</sub>** Energy = -1528.681832189

|   |            |            |            |             |                          |            |            |
|---|------------|------------|------------|-------------|--------------------------|------------|------------|
| N | 0.5204836  | 1.3165484  | 3.5038314  | H           | -4.7119701               | -1.9339408 | -2.8312466 |
| N | 0.4531439  | 1.3541392  | 2.3485380  | H           | -6.1679128               | -2.8820700 | -2.4321313 |
| C | 0.4576161  | 1.2372137  | 1.0700507  | C           | -5.5899740               | -3.1742831 | 0.3120665  |
| H | 2.1583963  | -0.0885681 | 0.3905820  | H           | -5.0120819               | -3.6082113 | 1.1412480  |
| C | -0.1215634 | 2.2442156  | 0.2087012  | H           | -6.0907107               | -2.2654411 | 0.6646699  |
| O | -0.2419131 | 2.1186884  | -1.0117352 | H           | -6.3523105               | -3.9055565 | 0.0049594  |
| O | -0.5130068 | 3.3651299  | 0.9067932  | H           | -2.4959769               | 0.8644095  | 0.8531614  |
| C | -1.1807091 | 4.4950586  | 0.2199109  |             |                          |            |            |
| C | -1.4453245 | 5.4661448  | 1.3709274  | 73          |                          |            |            |
| H | -0.5017365 | 5.7633233  | 1.8502371  | <b>Int1</b> | Energy = -1528.724698442 |            |            |
| H | -1.9470998 | 6.3682762  | 0.9929494  | N           | 1.0671951                | 0.6774584  | 3.1657878  |
| H | -2.0888248 | 4.9975596  | 2.1287518  | N           | -0.1657995               | -1.0795610 | 2.7696773  |
| C | -2.4978872 | 4.0305001  | -0.4064227 | C           | 0.0975588                | -1.0626058 | 4.1296454  |
| H | -2.3214594 | 3.3365172  | -1.2356613 | H           | -0.2780946               | -1.8150778 | 4.8094299  |
| H | -3.1238354 | 3.5302113  | 0.3470681  | C           | 0.8759667                | 0.0340275  | 4.3770165  |
| H | -3.0512339 | 4.9033942  | -0.7839238 | H           | 1.2956851                | 0.3933031  | 5.3067854  |
| C | -0.2367405 | 5.1238314  | -0.8092442 | C           | 1.9074463                | 1.9039652  | 2.9044395  |
| H | 0.7208538  | 5.3867403  | -0.3352733 | C           | 1.1041991                | 2.8461790  | 1.9977700  |
| H | -0.0468090 | 4.4352739  | -1.6404506 | H           | 1.7022634                | 3.7479964  | 1.8074064  |
| H | -0.6879770 | 6.0461747  | -1.2042442 | H           | 0.1658630                | 3.1495506  | 2.4842384  |
| N | -0.1248680 | -0.6642618 | 0.4193327  | H           | 0.8649504                | 2.3794972  | 1.0293145  |
| N | -1.3039963 | -0.7337323 | 0.3048459  | C           | 2.2162593                | 2.5867511  | 4.2392624  |
| C | -2.4752050 | -0.1497994 | 0.4451041  | H           | 2.7772686                | 3.5072546  | 4.0310777  |
| C | -3.7171804 | -0.7873429 | 0.0765906  | H           | 2.8431927                | 1.9614633  | 4.8912669  |
| O | -4.8169551 | -0.2473217 | 0.2132225  | H           | 1.2982035                | 2.8660078  | 4.7763443  |
| O | -3.5243508 | -2.0455075 | -0.4396780 | C           | 3.2016169                | 1.4419596  | 2.2192828  |
| C | -4.6685186 | -2.8716281 | -0.8733827 | H           | 3.8275820                | 2.3169523  | 1.9940852  |
| C | -3.9848108 | -4.1507710 | -1.3599437 | H           | 2.9840180                | 0.9121627  | 1.2821470  |
| H | -3.4159652 | -4.6170445 | -0.5431159 | H           | 3.7720426                | 0.7683804  | 2.8755706  |
| H | -4.7381095 | -4.8673229 | -1.7172208 | C           | -1.0500090               | -2.0563619 | 2.0279597  |
| H | -3.2930001 | -3.9272592 | -2.1842934 | C           | -0.3110813               | -2.5037393 | 0.7606663  |
| C | -5.4141437 | -2.1912744 | -2.0250193 | H           | -0.9455471               | -3.2156160 | 0.2157366  |
| H | -5.9162897 | -1.2782877 | -1.6853132 | H           | 0.6389173                | -2.9962871 | 1.0112153  |

|   |            |            |            |                                                 |            |            |            |
|---|------------|------------|------------|-------------------------------------------------|------------|------------|------------|
| H | -0.0952935 | -1.6608538 | 0.0936116  | C                                               | -3.1319669 | 0.1523837  | -2.0726408 |
| C | -2.3583372 | -1.3310957 | 1.6856052  | O                                               | -3.6848989 | -0.2772772 | -3.0911432 |
| H | -3.0329742 | -2.0290478 | 1.1701219  | O                                               | -3.8019539 | 0.4845707  | -0.9215229 |
| H | -2.1851743 | -0.4788298 | 1.0126750  | C                                               | -5.2667030 | 0.3456946  | -0.8326455 |
| H | -2.8597607 | -0.9794056 | 2.5998920  | C                                               | -5.5588610 | 0.8198658  | 0.5926975  |
| C | -1.3199475 | -3.2613018 | 2.9328495  | H                                               | -5.2149166 | 1.8546097  | 0.7315735  |
| H | -1.9151415 | -3.9870361 | 2.3635925  | H                                               | -6.6396448 | 0.7786550  | 0.7898000  |
| H | -1.9024561 | -2.9891734 | 3.8249595  | H                                               | -5.0435387 | 0.1815587  | 1.3243188  |
| H | -0.3888765 | -3.7583098 | 3.2427279  | C                                               | -5.6835445 | -1.1188871 | -1.0022980 |
| C | 0.4304236  | -0.0144220 | 2.2007956  | H                                               | -5.4855761 | -1.4689579 | -2.0217148 |
| N | 0.8145711  | 1.9024545  | -3.7573875 | H                                               | -5.1324552 | -1.7548745 | -0.2935369 |
| N | 1.0511843  | 1.2514760  | -2.8386001 | H                                               | -6.7585340 | -1.2223213 | -0.7904489 |
| C | 1.1201945  | 0.5703850  | -1.7161890 | C                                               | -5.9579893 | 1.2599647  | -1.8490819 |
| H | 0.4175747  | 0.2574101  | 1.1244528  | H                                               | -5.5956094 | 2.2923948  | -1.7371268 |
| C | 2.3236843  | -0.1859811 | -1.4059492 | H                                               | -5.7659317 | 0.9251961  | -2.8745328 |
| O | 2.4923111  | -0.7589048 | -0.3285645 | H                                               | -7.0434774 | 1.2545860  | -1.6683513 |
| O | 3.2151493  | -0.1629236 | -2.4377296 | H                                               | -1.1474168 | 0.1200236  | -2.9055314 |
| C | 4.5139090  | -0.8736222 | -2.3480470 |                                                 |            |            |            |
| C | 5.1515654  | -0.5616072 | -3.7014422 | 73                                              |            |            |            |
| H | 5.2806670  | 0.5226524  | -3.8271184 | <b>TS<sub>13</sub></b> Energy = -1528.718960464 |            |            |            |
| H | 6.1373158  | -1.0428769 | -3.7695684 | N                                               | 0.9091052  | 1.1154245  | 2.8169792  |
| H | 4.5211464  | -0.9348918 | -4.5204866 | N                                               | -0.4210207 | -0.6112343 | 2.9227197  |
| C | 4.2791171  | -2.3775792 | -2.1917952 | C                                               | -0.2539551 | -0.1443035 | 4.2160546  |
| H | 3.8192589  | -2.6082708 | -1.2237245 | H                                               | -0.7297481 | -0.6032678 | 5.0721457  |
| H | 3.6255453  | -2.7461028 | -2.9954394 | C                                               | 0.5847929  | 0.9346306  | 4.1508199  |
| H | 5.2414944  | -2.9051330 | -2.2622697 | H                                               | 0.9641613  | 1.5693161  | 4.9403010  |
| C | 5.3557777  | -0.2947612 | -1.2078812 | C                                               | 1.8526242  | 2.1342184  | 2.2246267  |
| H | 5.4319966  | 0.7977311  | -1.3069920 | C                                               | 1.1376029  | 2.8147968  | 1.0490519  |
| H | 4.9213554  | -0.5353881 | -0.2309645 | H                                               | 1.8108344  | 3.5616762  | 0.6061158  |
| H | 6.3710306  | -0.7150040 | -1.2580913 | H                                               | 0.2266589  | 3.3277928  | 1.3893541  |
| N | 0.1763072  | 0.8311305  | -0.6638449 | H                                               | 0.8646902  | 2.0904449  | 0.2681444  |
| N | -1.1091450 | 0.7004313  | -0.8530487 | C                                               | 2.2095495  | 3.1641729  | 3.2989928  |
| C | -1.6955544 | 0.3470605  | -1.9843061 | H                                               | 2.8618978  | 3.9210551  | 2.8439941  |

|   |            |            |            |                                         |            |            |            |
|---|------------|------------|------------|-----------------------------------------|------------|------------|------------|
| H | 2.7615499  | 2.7144051  | 4.1368381  | H                                       | 4.4367152  | -2.5567406 | -1.7147688 |
| H | 1.3169797  | 3.6775784  | 3.6846301  | H                                       | 4.1757810  | -2.6373301 | -3.4810859 |
| C | 3.1078295  | 1.3841441  | 1.7547715  | H                                       | 5.8270029  | -2.4732336 | -2.8333948 |
| H | 3.8122870  | 2.1000976  | 1.3084010  | C                                       | 5.4207387  | 0.0357897  | -1.6094197 |
| H | 2.8650640  | 0.6237698  | 0.9999872  | H                                       | 5.2556521  | 1.1227234  | -1.6461966 |
| H | 3.6070854  | 0.8917444  | 2.6022026  | H                                       | 5.0917747  | -0.3424785 | -0.6348959 |
| C | -1.3039523 | -1.7525814 | 2.4706603  | H                                       | 6.4994116  | -0.1510624 | -1.7186362 |
| C | -0.4985030 | -2.6114191 | 1.4862559  | N                                       | 0.1817721  | 0.0188618  | -0.8492528 |
| H | -1.1286223 | -3.4449295 | 1.1469136  | N                                       | -1.1175036 | 0.0225715  | -1.0619613 |
| H | 0.3976528  | -3.0259192 | 1.9696603  | C                                       | -1.6413997 | -0.3338783 | -2.2412548 |
| H | -0.1893675 | -2.0409185 | 0.6010105  | C                                       | -3.0899820 | -0.3583050 | -2.4243852 |
| C | -2.5467590 | -1.1477779 | 1.8009944  | O                                       | -3.6319298 | -0.9341678 | -3.3706727 |
| H | -3.2198798 | -1.9607060 | 1.4928698  | O                                       | -3.7608667 | 0.3117093  | -1.4400859 |
| H | -2.2782656 | -0.5691705 | 0.9032833  | C                                       | -5.2363091 | 0.3213483  | -1.3977515 |
| H | -3.0906953 | -0.5004980 | 2.5049606  | C                                       | -5.5236675 | 1.1351473  | -0.1344725 |
| C | -1.6967476 | -2.5839840 | 3.6945955  | H                                       | -5.0945240 | 2.1432111  | -0.2210149 |
| H | -2.2809778 | -3.4459616 | 3.3472608  | H                                       | -6.6088364 | 1.2260529  | 0.0168513  |
| H | -2.3307354 | -2.0195599 | 4.3935871  | H                                       | -5.0853731 | 0.6448472  | 0.7464863  |
| H | -0.8157209 | -2.9672171 | 4.2298808  | C                                       | -5.7755549 | -1.1042097 | -1.2480131 |
| C | 0.2906524  | 0.1676892  | 2.0862255  | H                                       | -5.5818322 | -1.6981477 | -2.1482080 |
| N | -0.1077028 | 1.1796851  | -3.5907738 | H                                       | -5.3037199 | -1.5982251 | -0.3855204 |
| N | 0.7613038  | 0.6985158  | -2.9816782 | H                                       | -6.8609161 | -1.0679074 | -1.0719546 |
| C | 1.0688651  | -0.0879611 | -1.9188712 | C                                       | -5.8039409 | 1.0282411  | -2.6317893 |
| H | 0.3545090  | 0.0754415  | 0.9754262  | H                                       | -5.3497568 | 2.0240220  | -2.7399625 |
| C | 2.4320846  | -0.5293513 | -1.6917575 | H                                       | -5.6107436 | 0.4491548  | -3.5417487 |
| O | 2.7805652  | -1.1103883 | -0.6614189 | H                                       | -6.8902845 | 1.1560853  | -2.5129405 |
| O | 3.2467587  | -0.2385130 | -2.7476555 | H                                       | -1.0801862 | -0.8772412 | -3.0076472 |
| C | 4.6687824  | -0.6519327 | -2.7525355 |                                         |            |            |            |
| C | 5.1570038  | -0.1351584 | -4.1058179 | 73                                      |            |            |            |
| H | 5.0390588  | 0.9558542  | -4.1678875 | <b>Comp 13</b> Energy = -1528.756148899 |            |            |            |
| H | 6.2198587  | -0.3818195 | -4.2399261 | O                                       | 0.8109429  | 5.6153470  | 8.2339920  |
| H | 4.5842784  | -0.5950387 | -4.9232776 | O                                       | 0.4055452  | 6.0231984  | 10.4568641 |
| C | 4.7780363  | -2.1769267 | -2.6845178 | O                                       | 6.1570956  | 2.4205105  | 11.0789631 |

|   |            |            |            |   |            |            |            |
|---|------------|------------|------------|---|------------|------------|------------|
| N | 3.2089658  | 4.3837531  | 8.9376292  | H | 8.9678337  | 3.1319280  | 13.8152100 |
| N | 4.3292961  | 3.8777546  | 9.2971447  | H | 7.3165186  | 3.7433328  | 14.0880493 |
| N | 2.4143989  | 4.3023280  | 11.1367934 | C | 8.7209777  | 5.5444521  | 12.5332005 |
| N | 3.5142845  | 3.7834486  | 11.5314253 | H | 9.7283893  | 5.4070508  | 12.9511152 |
| C | 2.3734514  | 4.9067861  | 9.8973379  | H | 8.7914817  | 6.2116464  | 11.6625942 |
| C | 1.1360250  | 5.5345860  | 9.4234394  | H | 8.0892683  | 6.0253936  | 13.2931237 |
| C | -0.9387691 | 6.6076369  | 10.2418391 | C | 8.9765245  | 3.5485122  | 11.0209145 |
| C | -0.8377962 | 7.8707116  | 9.3832164  | H | 9.0029614  | 4.2005388  | 10.1359117 |
| H | -1.8170358 | 8.3713453  | 9.3574385  | H | 10.0075895 | 3.4150463  | 11.3802061 |
| H | -0.5326051 | 7.6307857  | 8.3582906  | H | 8.5735378  | 2.5712389  | 10.7320401 |
| H | -0.1075126 | 8.5680065  | 9.8189243  | C | 1.0395605  | 0.9721792  | 9.0711337  |
| C | -1.8767732 | 5.5626754  | 9.6316530  | C | 3.4056616  | 3.5064106  | 5.3799023  |
| H | -2.9020340 | 5.9604669  | 9.6142234  | C | 0.2761496  | -0.2704470 | 8.5878251  |
| H | -1.8736132 | 4.6482084  | 10.2424386 | H | 0.9540913  | -1.1119705 | 8.3872225  |
| H | -1.5786744 | 5.3105205  | 8.6072316  | H | -0.4297496 | -0.5851327 | 9.3682061  |
| C | -1.3746498 | 6.9551417  | 11.6651251 | H | -0.2923236 | -0.0511690 | 7.6724006  |
| H | -2.3780482 | 7.4039701  | 11.6516029 | C | 1.8626629  | 0.6700676  | 10.3313191 |
| H | -0.6755095 | 7.6727197  | 12.1169232 | H | 2.4592764  | 1.5399021  | 10.6367938 |
| H | -1.3989353 | 6.0522204  | 12.2907051 | H | 1.1768067  | 0.4156483  | 11.1508283 |
| C | 4.6512157  | 4.2613385  | 10.6919192 | H | 2.5367961  | -0.1846618 | 10.1805748 |
| H | 4.6818497  | 5.3697755  | 10.7556123 | C | 0.0645131  | 2.1196043  | 9.3378445  |
| C | 5.9406059  | 3.6188737  | 11.1345766 | H | -0.5055844 | 2.3979045  | 8.4393682  |
| O | 6.7978367  | 4.5629178  | 11.5998559 | H | -0.6545839 | 1.7867169  | 10.0972057 |
| N | 2.9946812  | 2.4338543  | 6.3525266  | H | 0.5806558  | 3.0008719  | 9.7374980  |
| N | 1.9956182  | 1.3641529  | 7.9753465  | C | 2.4076744  | 4.6623165  | 5.4565556  |
| C | 2.0040959  | 2.5049468  | 7.2605598  | H | 2.7335084  | 5.4441161  | 4.7577658  |
| C | 3.0310803  | 0.5581133  | 7.5261660  | H | 1.3982909  | 4.3441309  | 5.1546731  |
| H | 3.2444057  | -0.4095378 | 7.9613291  | H | 2.3571778  | 5.0941585  | 6.4654660  |
| C | 3.6537402  | 1.2260603  | 6.5148918  | C | 3.4000575  | 2.8881853  | 3.9740421  |
| H | 4.5096966  | 0.9457191  | 5.9147351  | H | 3.6816118  | 3.6591618  | 3.2439091  |
| C | 8.1386879  | 4.1909782  | 12.1284587 | H | 4.1209919  | 2.0633455  | 3.8824552  |
| C | 7.9834824  | 3.2794818  | 13.3469356 | H | 2.4001422  | 2.5129111  | 3.7132210  |
| H | 7.5765418  | 2.3017267  | 13.0648692 | C | 4.8127636  | 3.9785569  | 5.7753241  |

|   |           |           |           |
|---|-----------|-----------|-----------|
| H | 5.5502311 | 3.1691415 | 5.6727653 |
| H | 5.1167169 | 4.7987787 | 5.1102310 |
| H | 4.8237616 | 4.3294119 | 6.8148349 |
| H | 1.3493599 | 3.3560902 | 7.4056569 |
